# Supplementary material for: Cervical Cancer Development: Implications of HPV16 E6E7-NFX1-123 Regulated Genes
Source: MDPI journal article supplement (doi:10.3390/cancers13246182), 2021-12-08

## Full Blot Images

| Antibody | Company/Cat. #                     | Primary Dilution | Secondary  | Secondary Dilution |
|----------|------------------------------------|------------------|------------|--------------------|
| RAB7B    | Novus Biologicals – H00338382-B01P | 1:1200           | Mouse-HRP  | 1:2500             |
| NOTCH1   | Cell Signaling – #3447             | 1:1000           | Rat-HRP    | 1:2000             |
| SLPI     | R&D Systems – AF1274               | 1:500            | Goat-HRP   | 1:2000             |
| RPS29    | Abcam – ab56224                    | 1:2500           | Rabbit-HRP | 1:2000             |
| FBN2     | ProteinTech – 20252-1-AP           | 1:750            | Rabbit-HRP | 1:2000             |
| NFX1-123 | Homemade. Kind gift of Ann Roman.  | 1:1200           | Rabbit-HRP | 1:2000             |
| FLAG     | Millipore-Sigma – F3165            | 1:1000           | Mouse-HRP  | 1:2000             |
| GAPDH    | Abcam – ab8245                     | 1:125,000        | Mouse-HRP  | 1:2500             |
| p53      | Santa Cruz – sc-126                | 1:1500           | Mouse-HRP  | 1:2500             |
| Rb       | Cell Signaling – #9309             | 1:1500           | Mouse-HRP  | 1:2500             |

All blots blocked and antibodies incubated in 4% non-fat dry milk in TBS-T

Blot 1  
FLAG 1:1000  
Mouse-HRP 1:2000

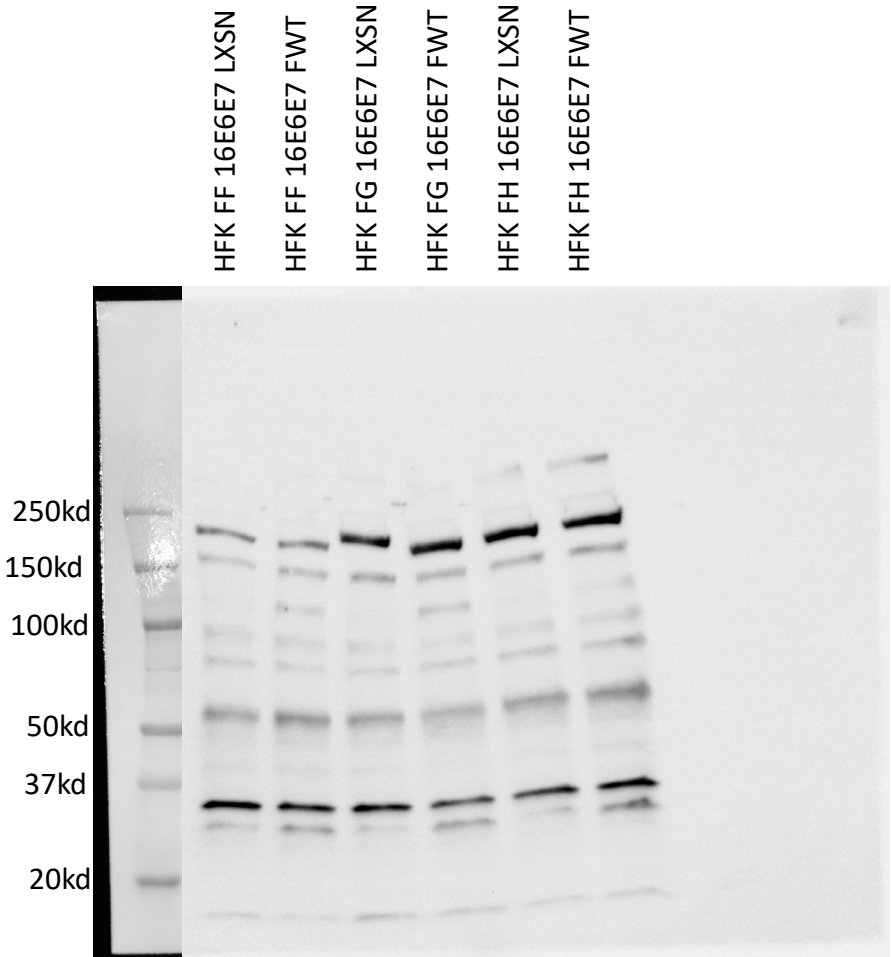



Blot 1  
GAPDH 1:125,000  
Mouse-HRP 1:2500

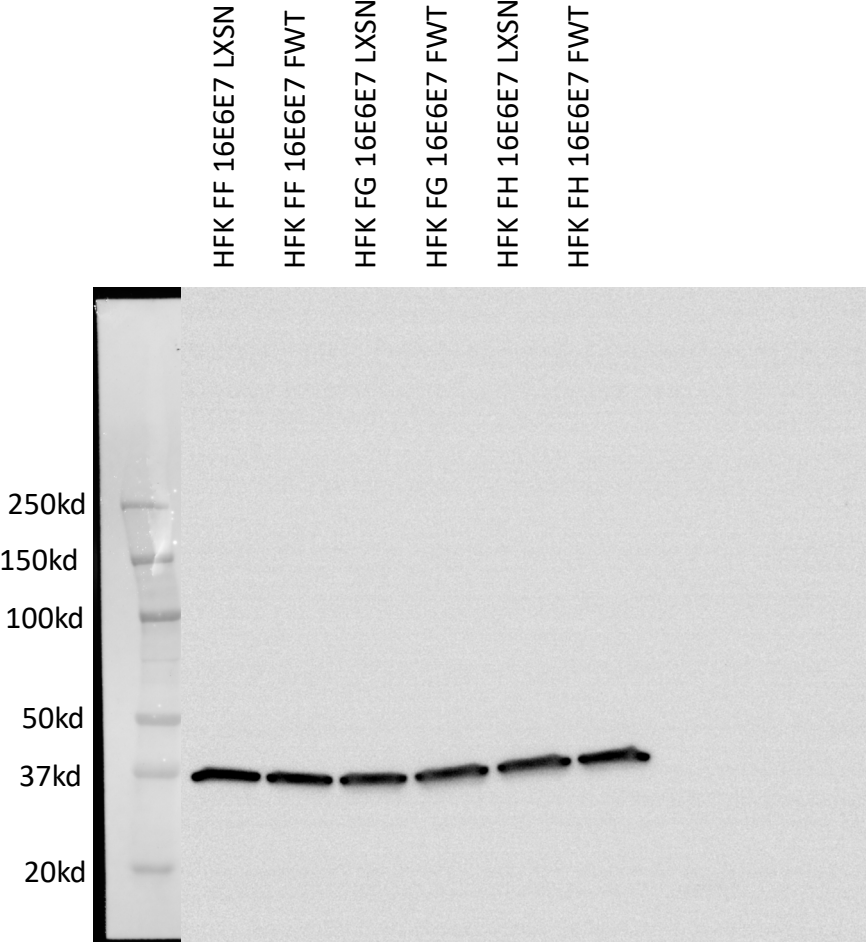

Blot 2  
Notch 1 1:1000  
Rat-HRP 1:2000

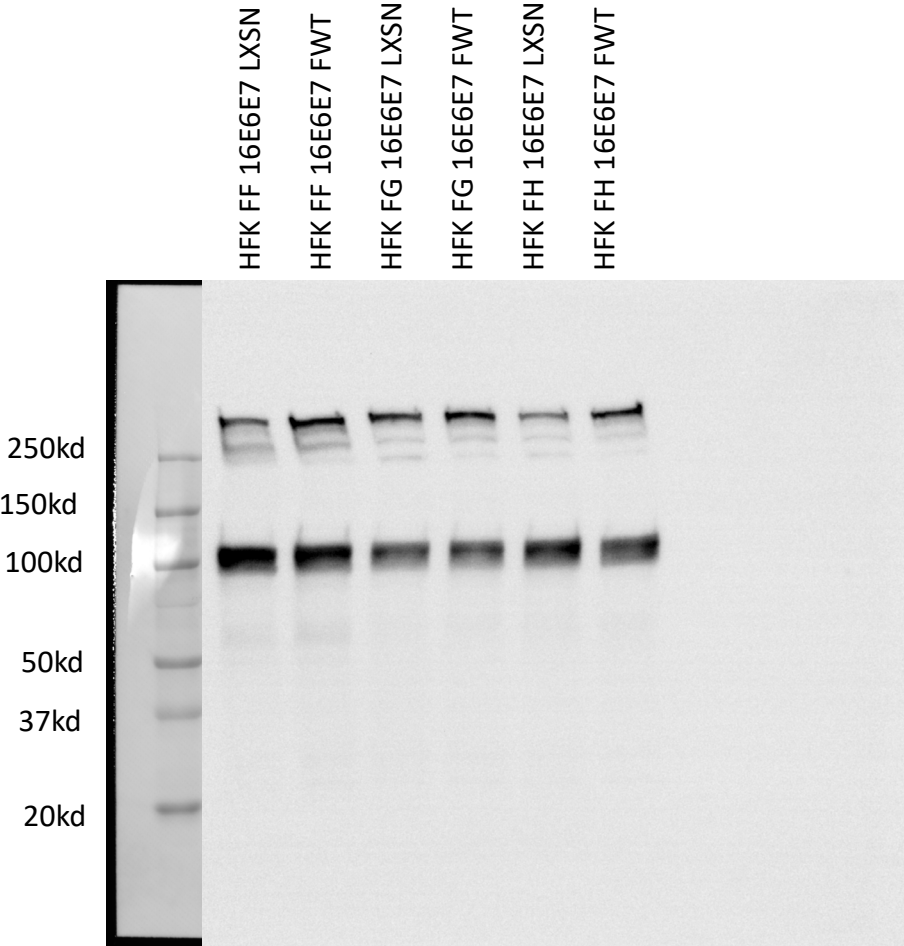

Blot 2  
RAB7B 1:1200  
Mouse-HRP 1:2500

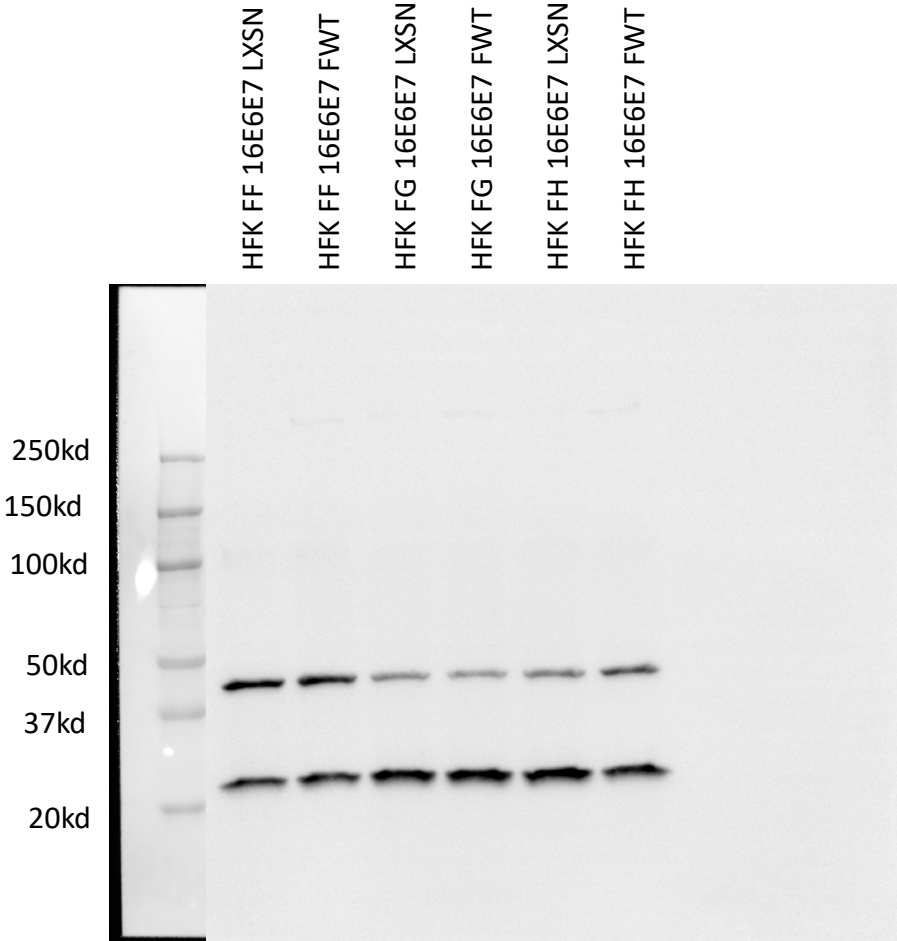

Blot 2  
GAPDH 1:125,000  
Mouse-HRP 1:2500

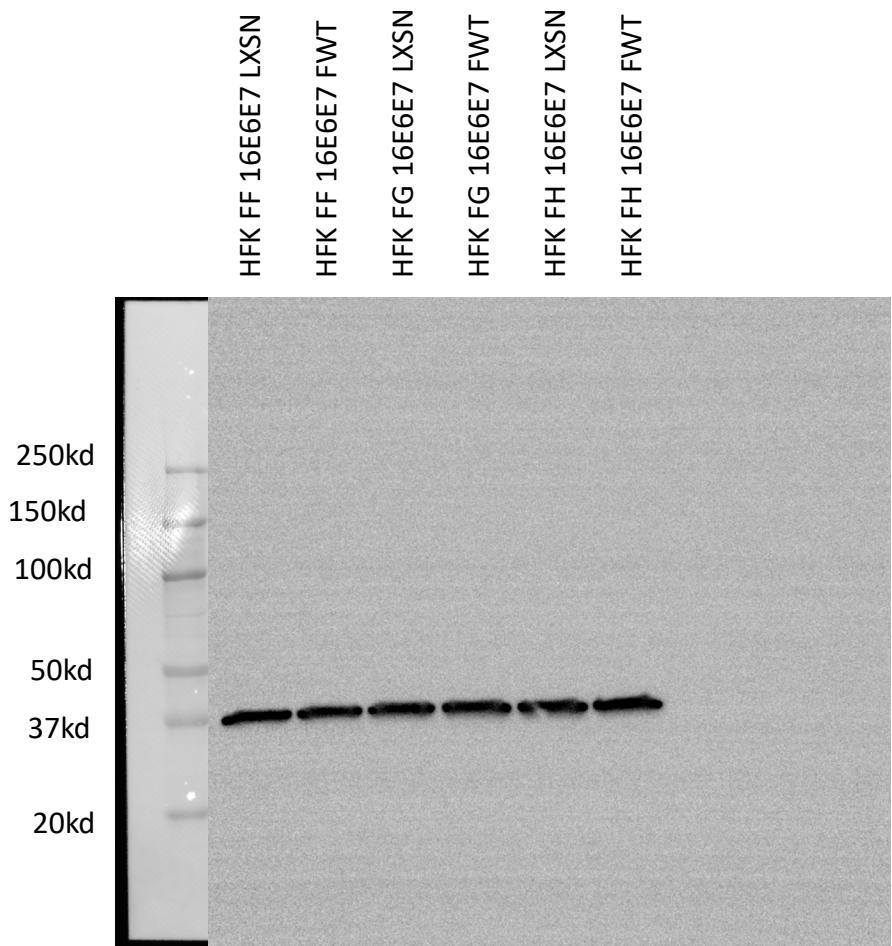

Blot 1  
Fbn2 1:750  
Rabbit-HRP 1:2000

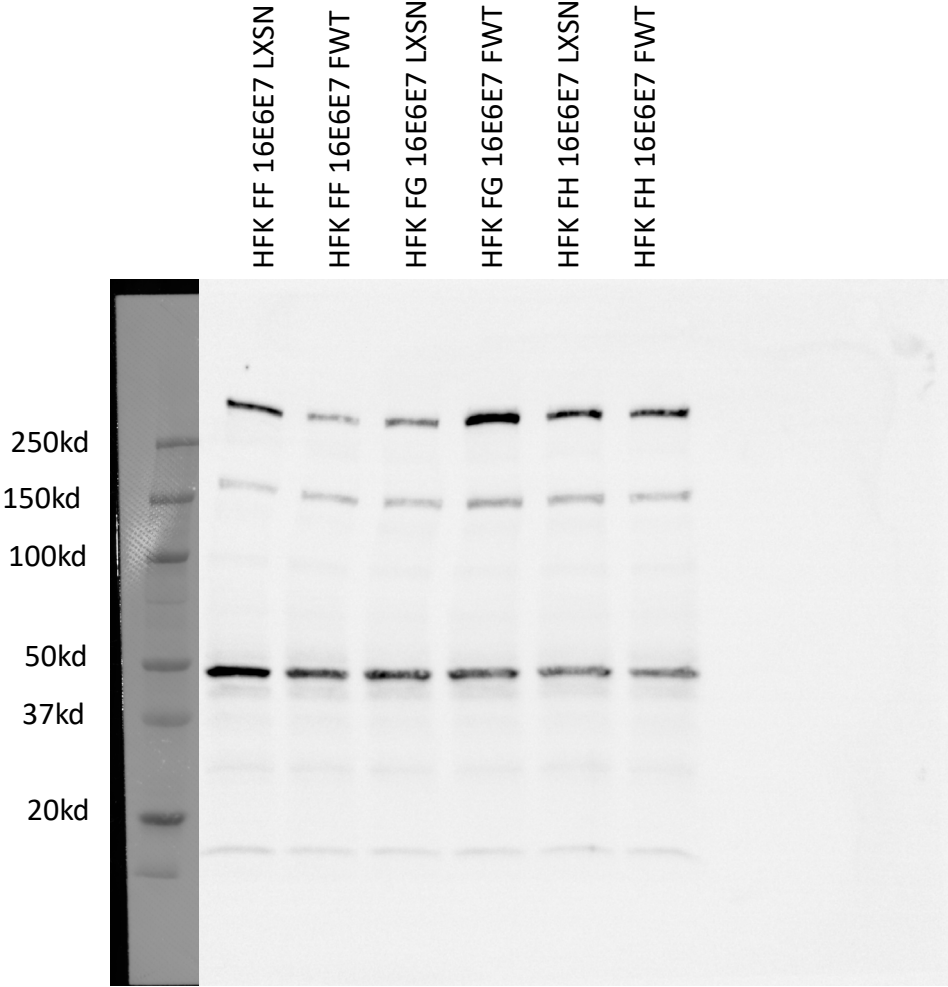

Blot 1  
Nfx1-123 1:1200  
Rabbit-HRP 1:2000

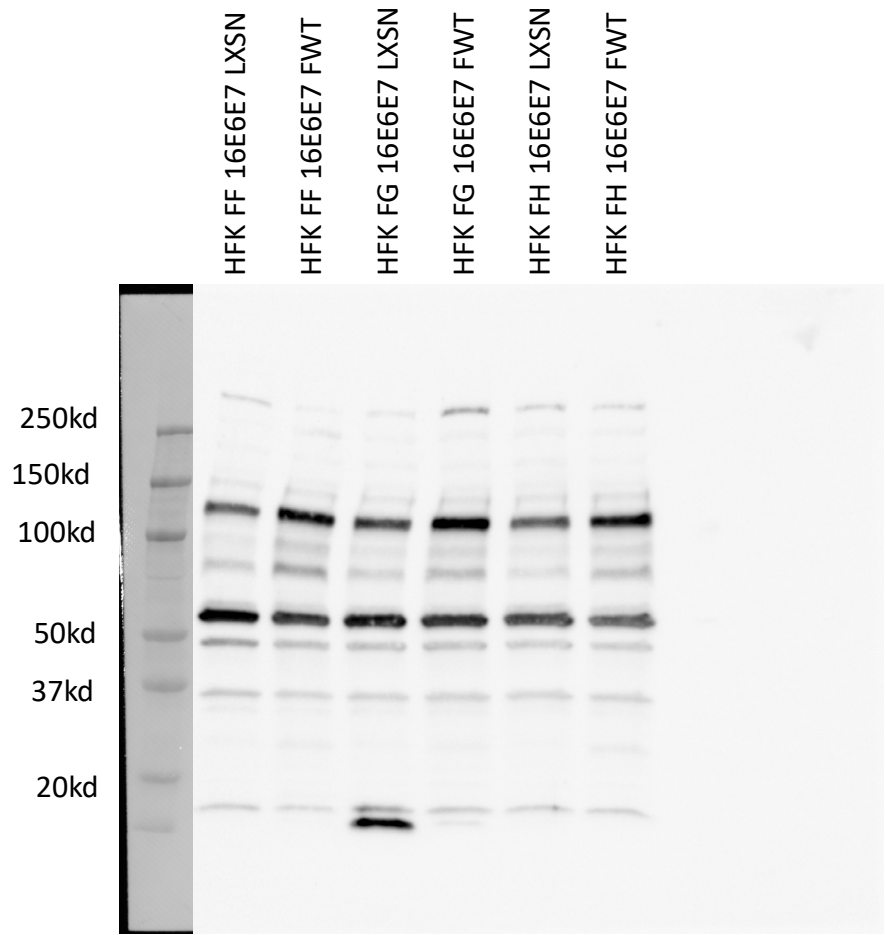

Blot 1  
GAPDH 1:125,000  
Mouse-HRP 1:2500

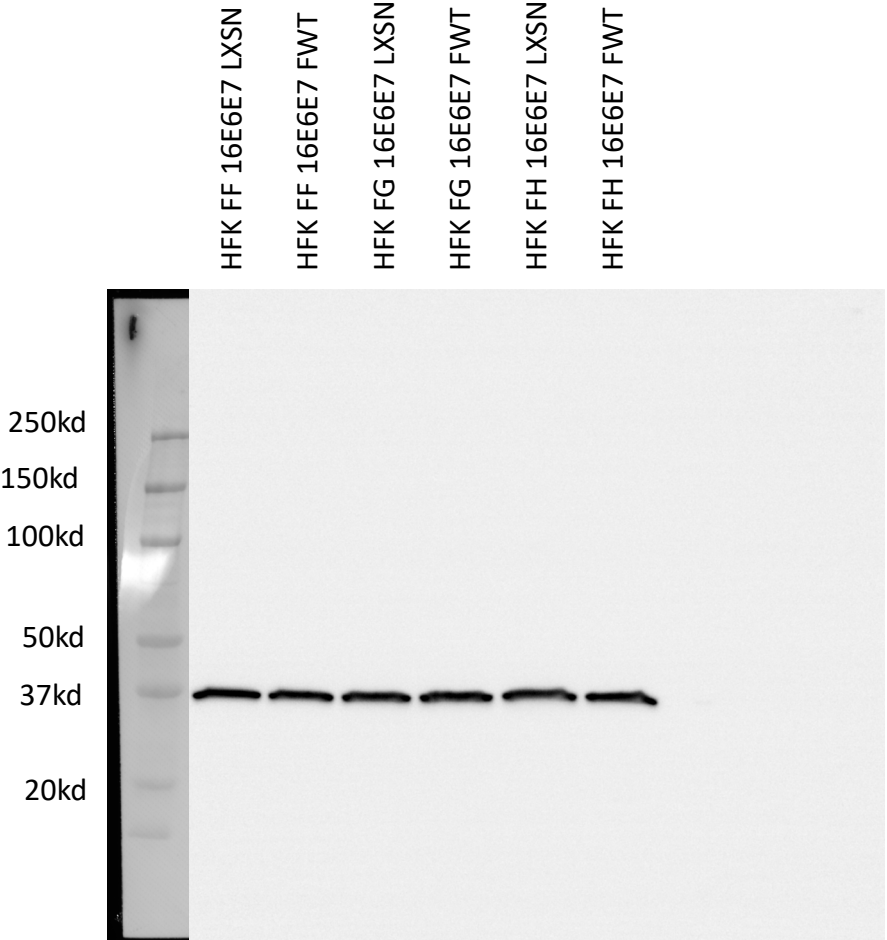

SLPI 1:500 Goat-  
HRP 1:2000

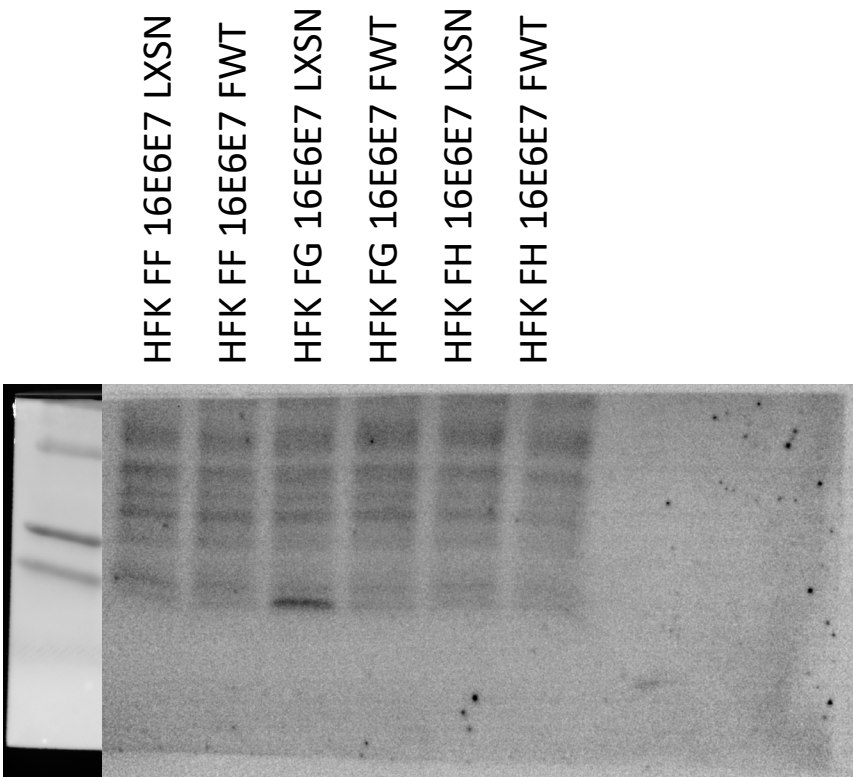



GAPDH 1:125,000  
Mouse-HRP 1:2500

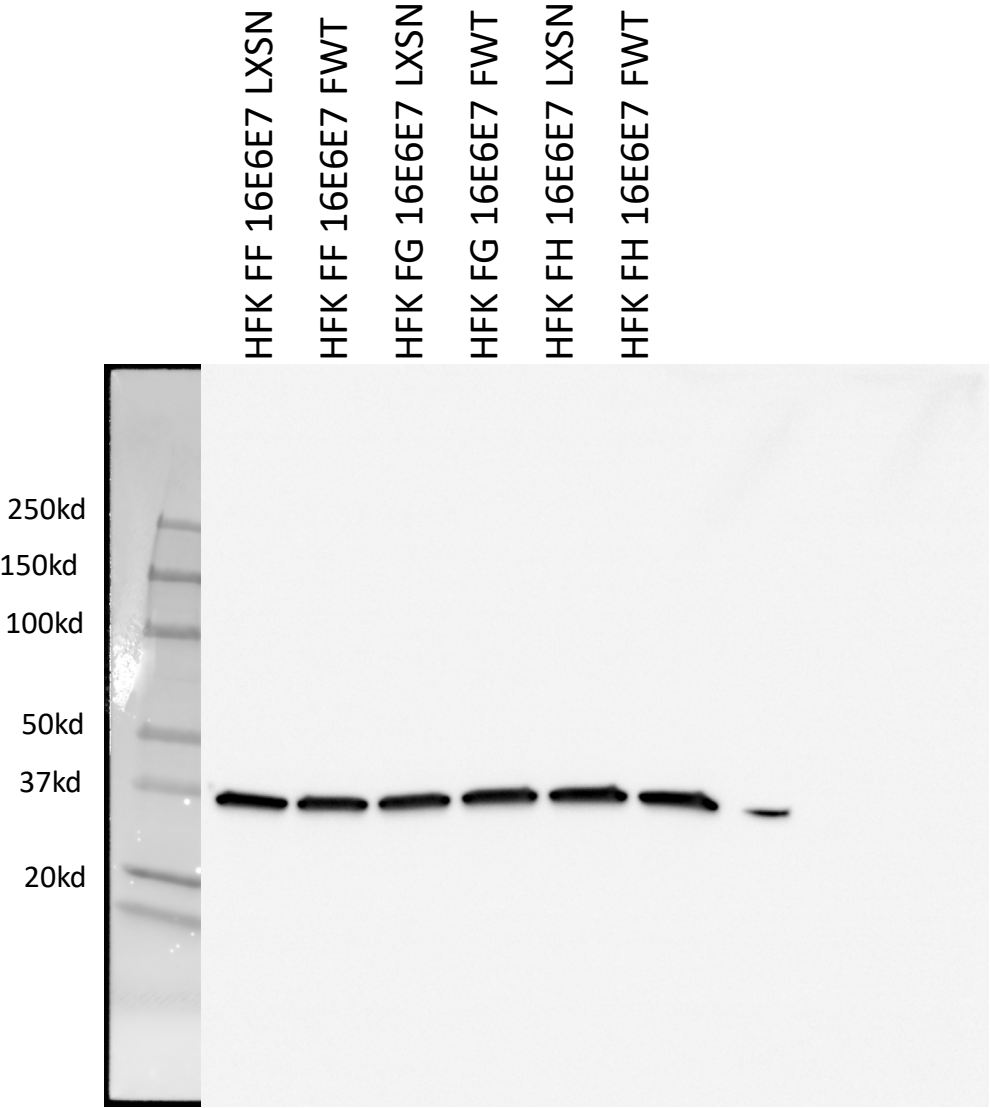

Blot 2  
RPS29 1:2500  
Rabbit-HRP 1:2000

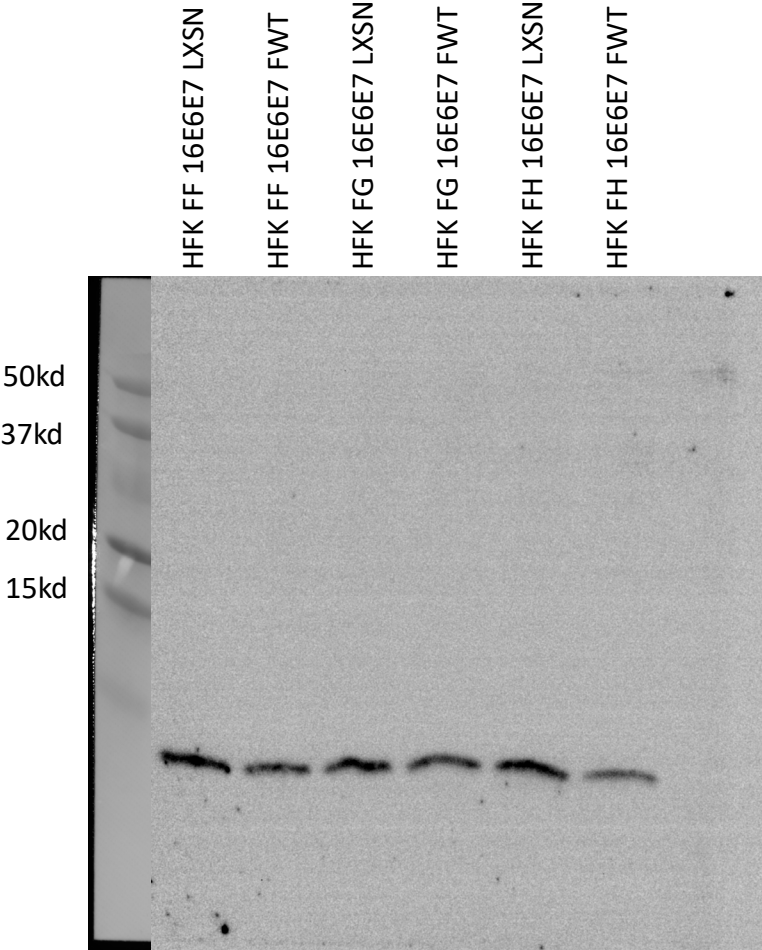

Blot 2

GAPDH 1:125,000

Mouse-HRP 1:2500

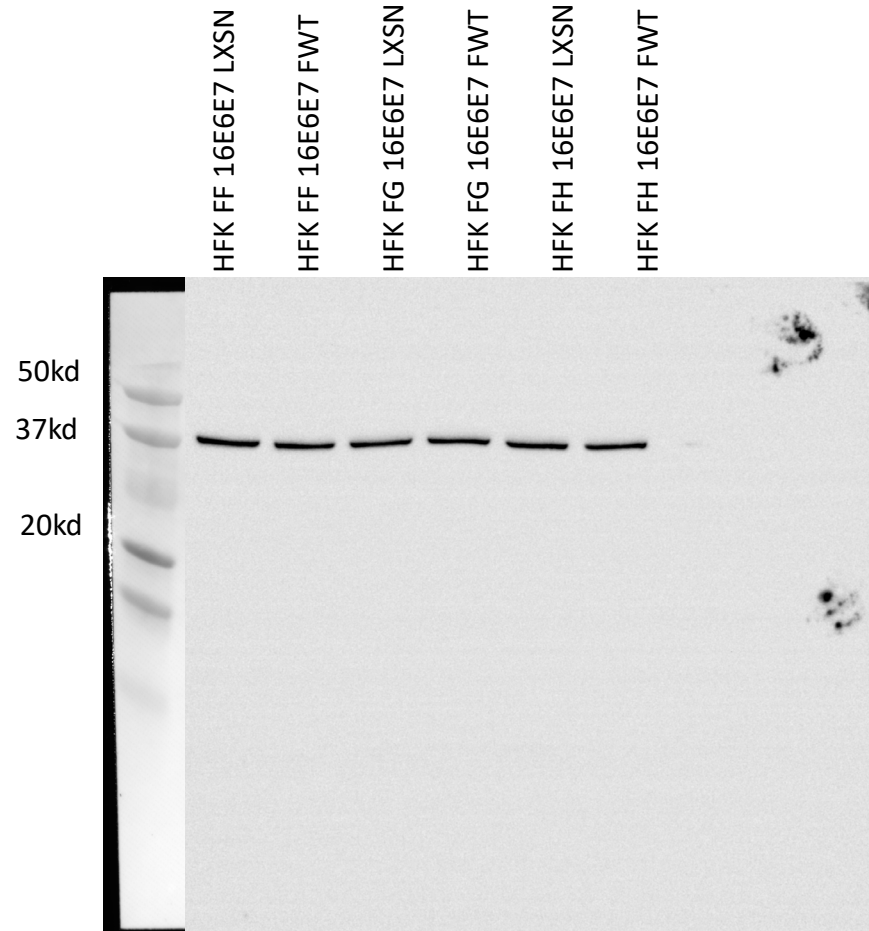



Blot 1  
SLPI 1:750 Goat-  
HRP 1:2500

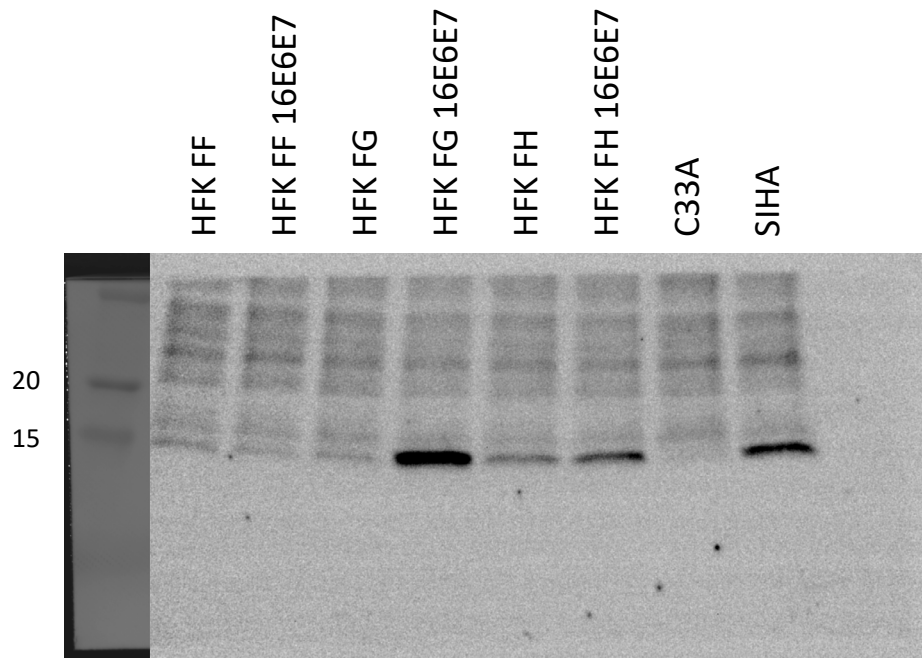

Blot 1  
RAB7B 1:1000  
Mouse-HRP 1:2500

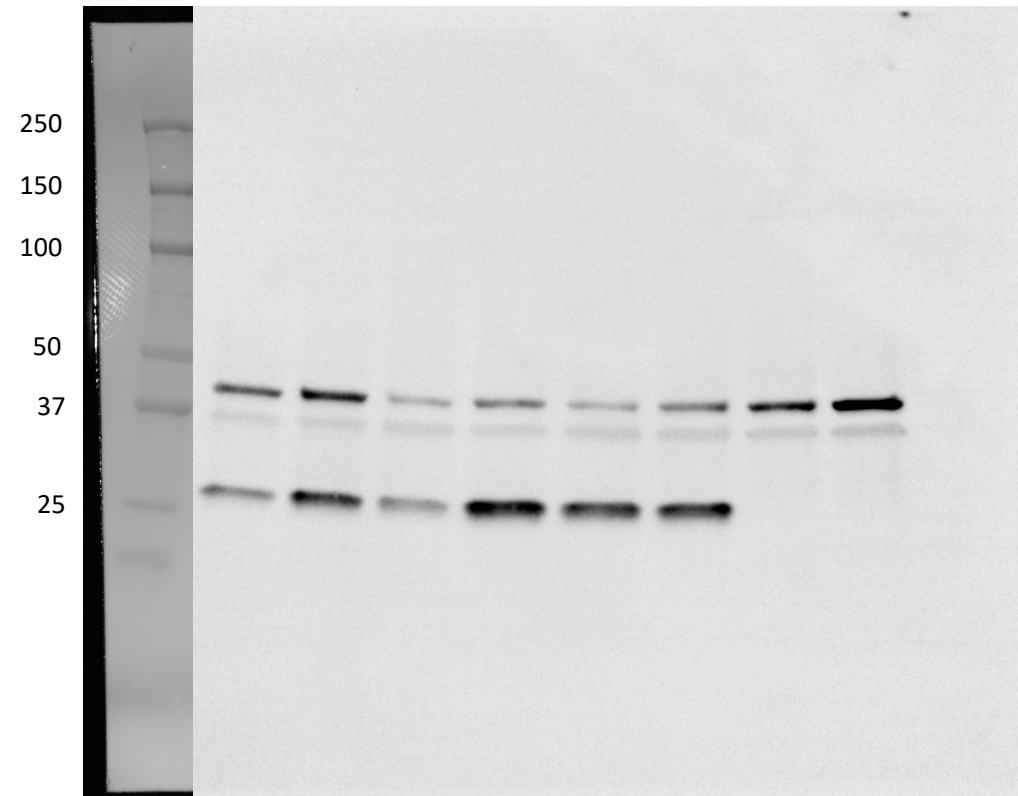

Blot 1  
GAPDH 1:125,000  
Mouse-HRP 1:2500

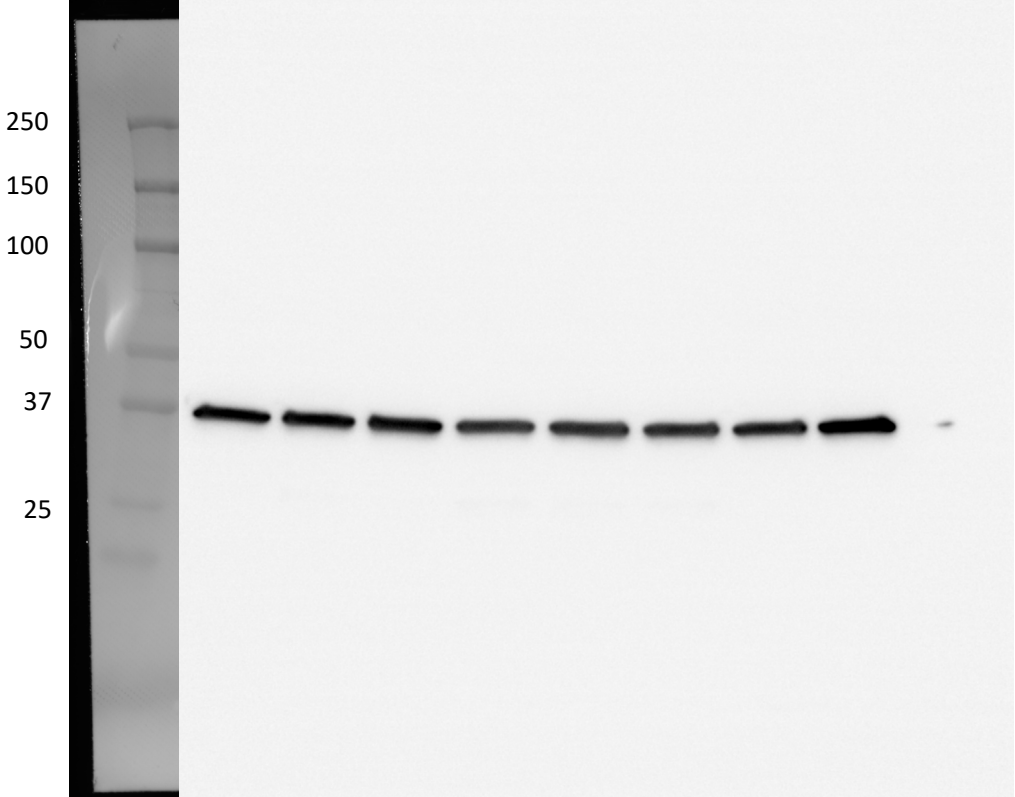

Blot 4  
FBN2 1:750  
Rabbit-HRP 1:2000

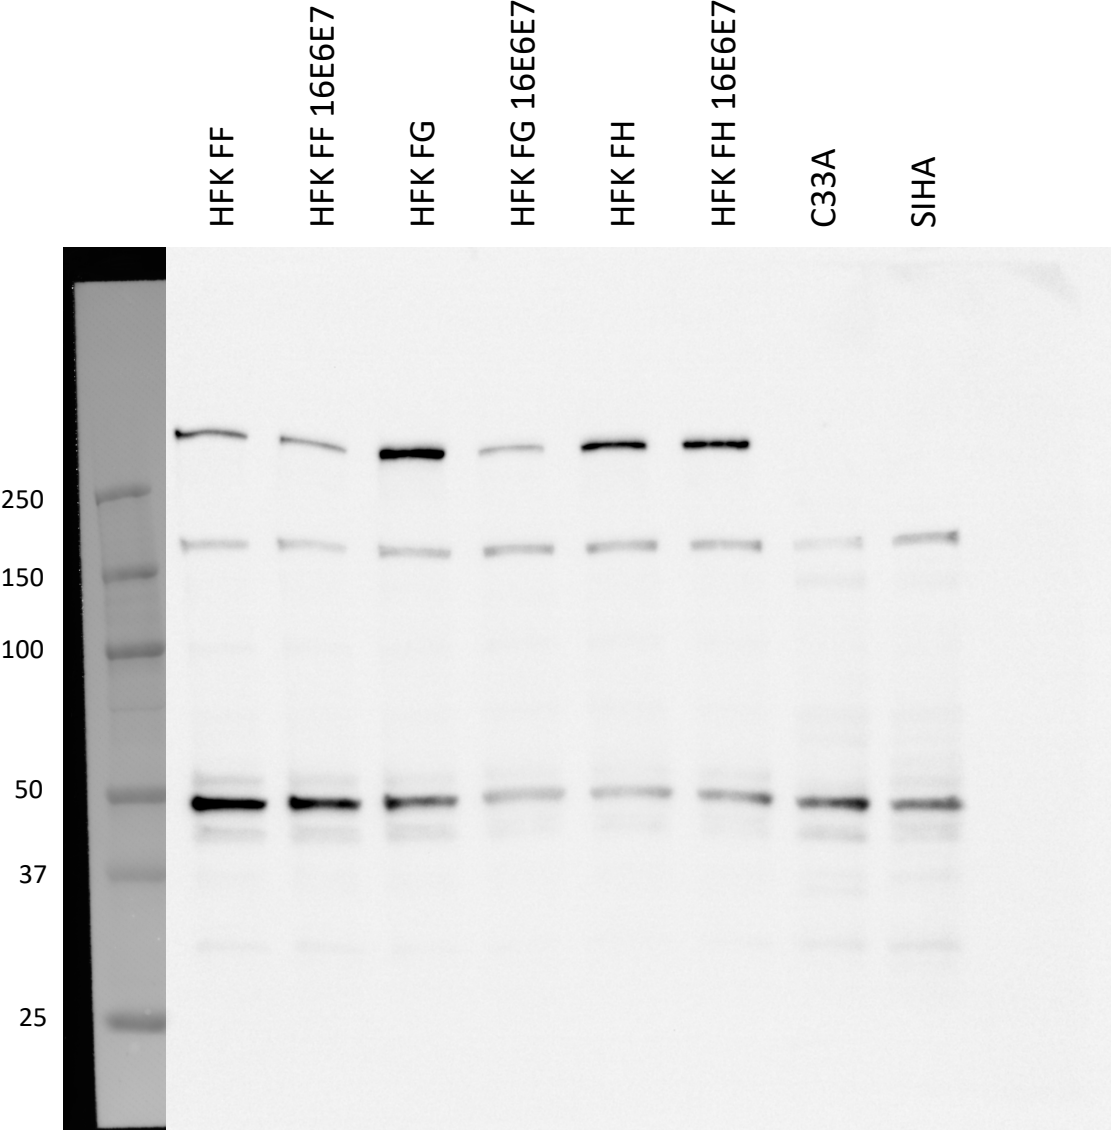



Blot 4  
NFX1-123 1:1000  
Rabbit-HRP 1:2000

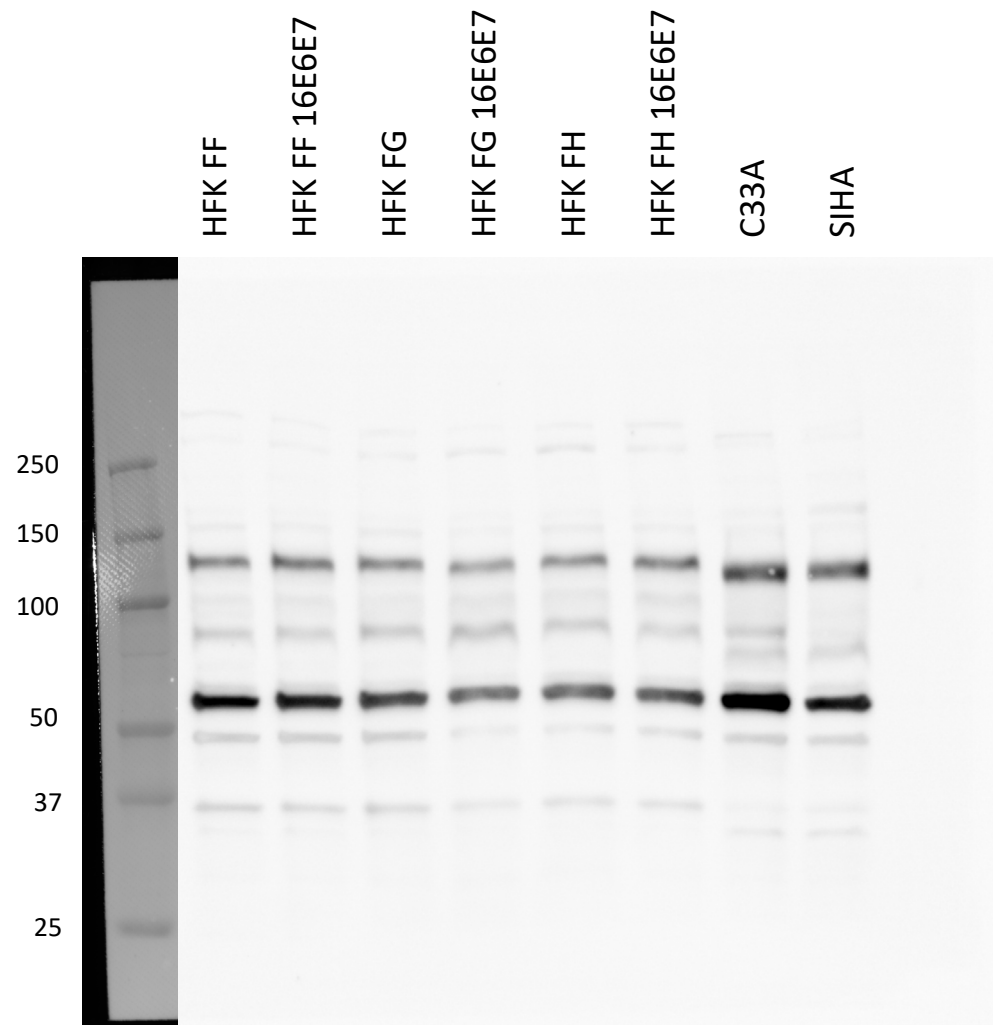

Blot 4  
GAPDH 1:125,000  
Mouse-HRP 1:2500

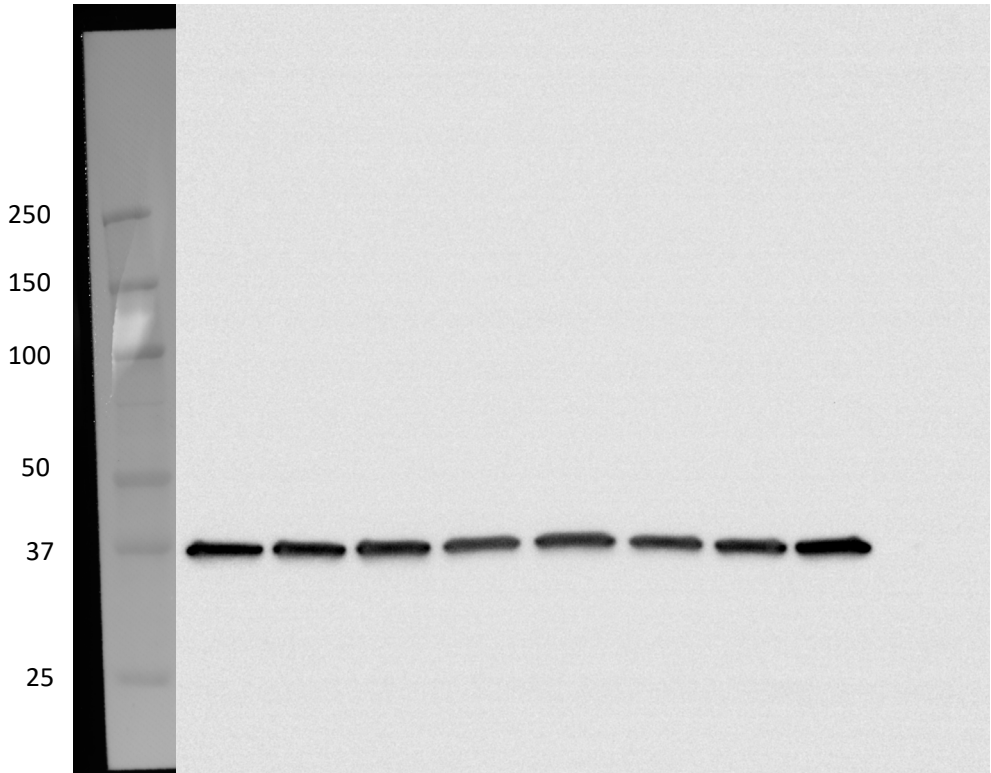

Blot 2  
Rb 1:1500 Mouse-  
HRP 1:2500

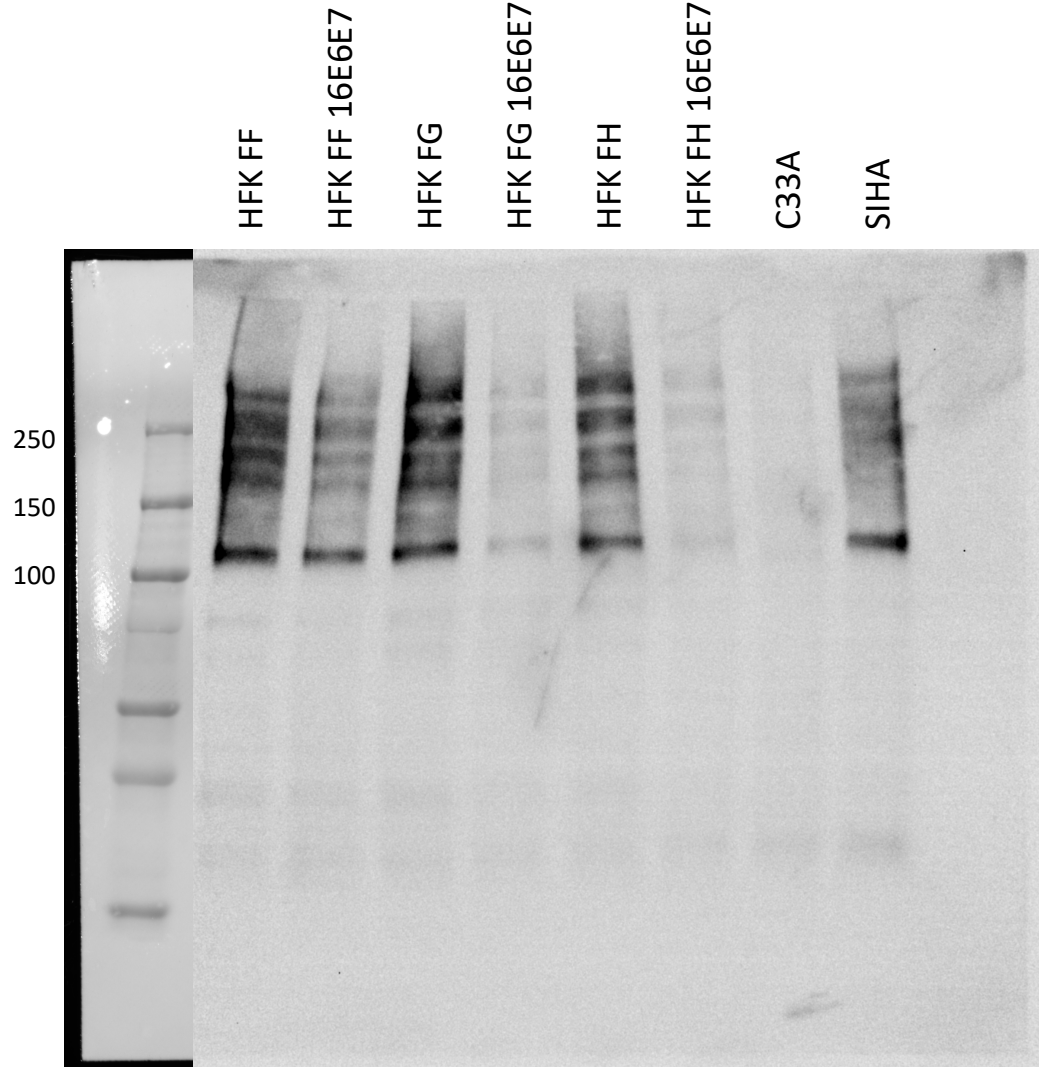

Blot 2  
p53 1:1500  
Mouse-HRP 1:2500

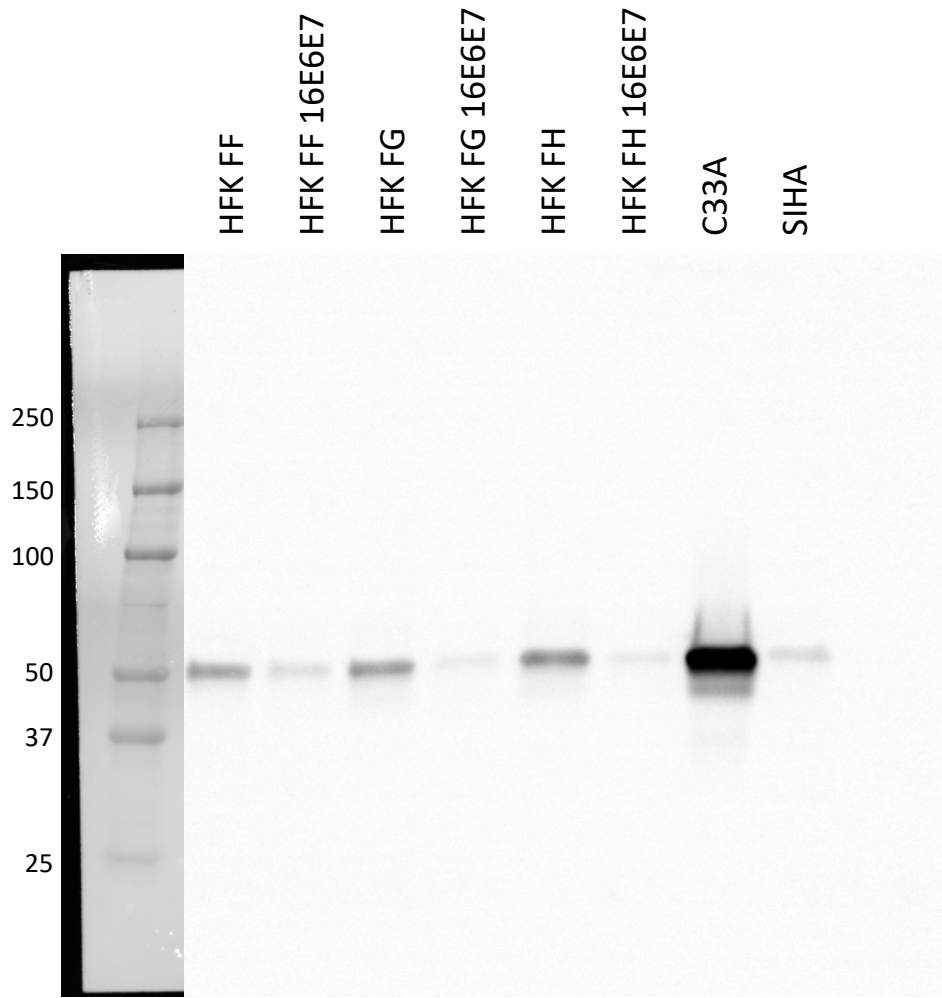

Blot 2  
GAPDH 1:125,000  
Mouse-HRP 1:2500

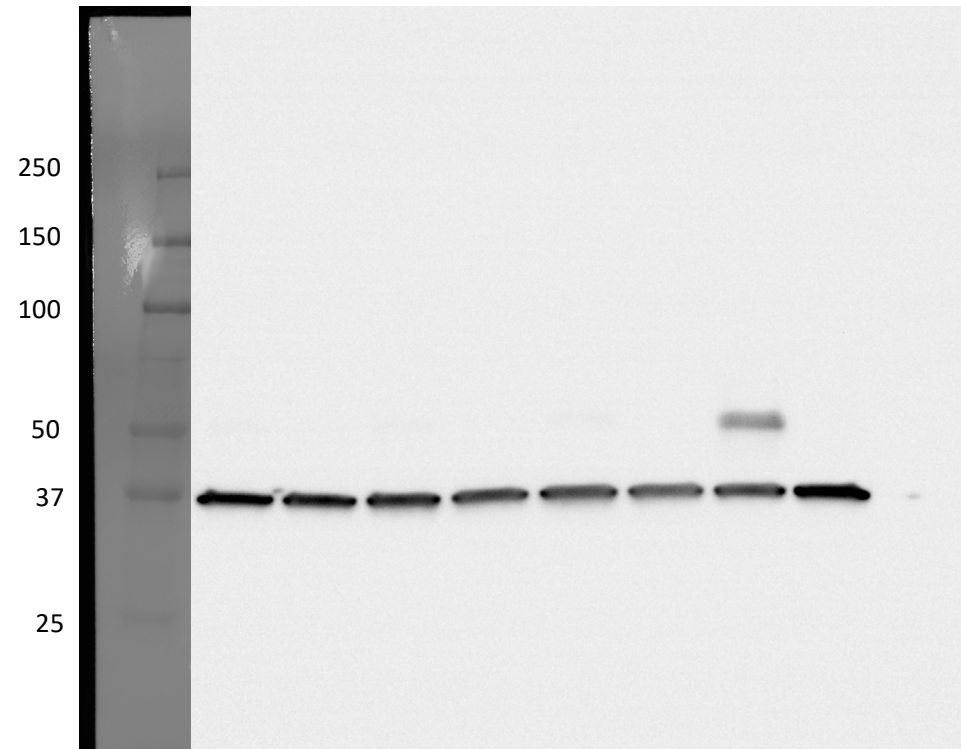

Blot 3 Notch1  
1:1000 Rat-HRP  
1:2000

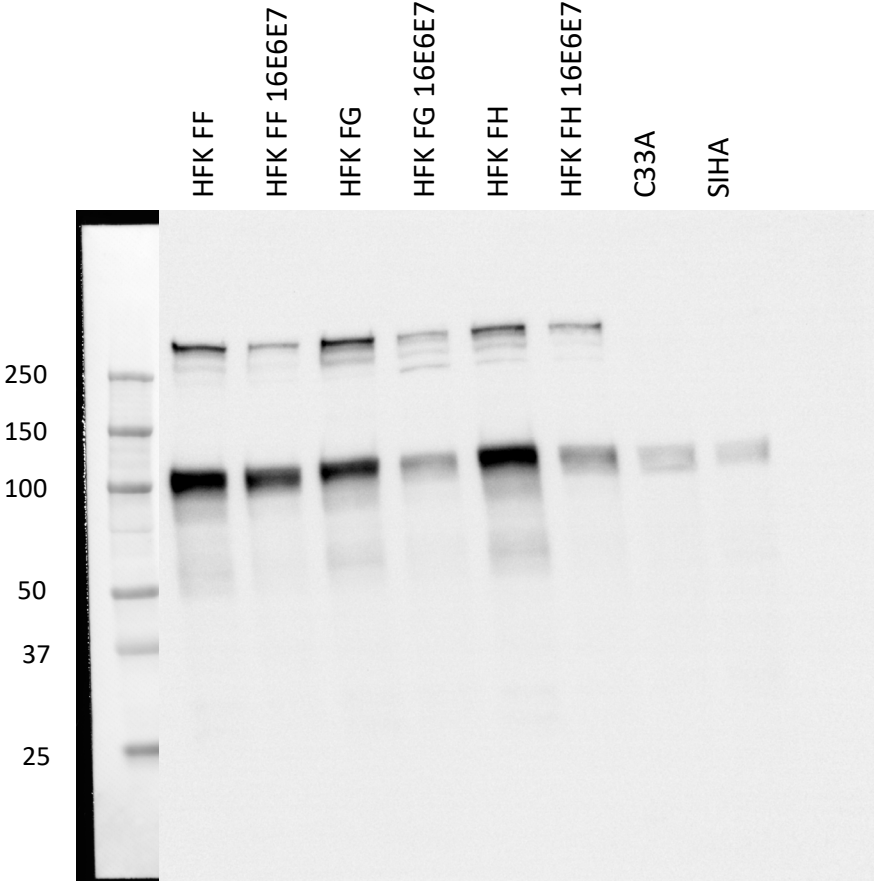

Blot 3

GAPDH 1:125,000

Mouse-HRP 1:2500

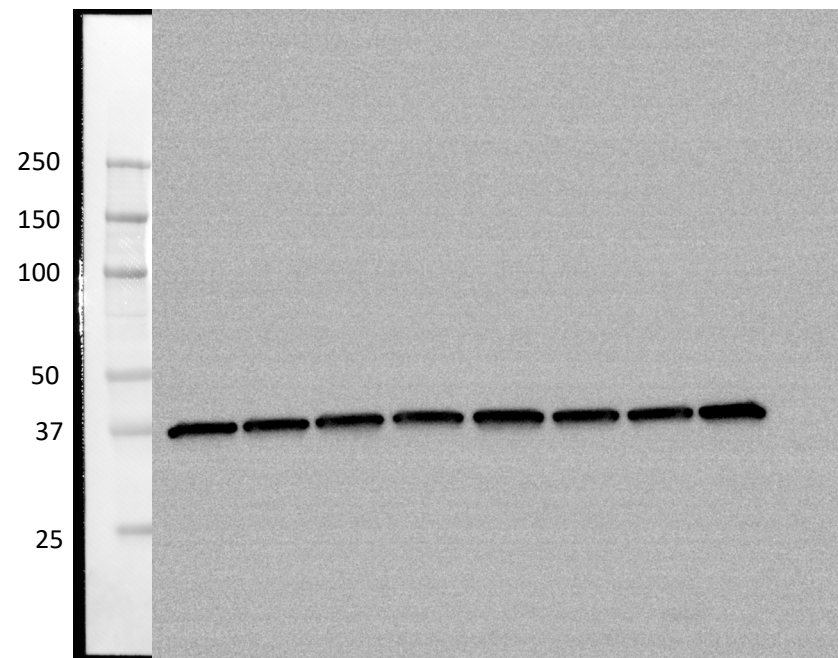

RPS29 1:2500  
Rabbit-HRP 1:2000

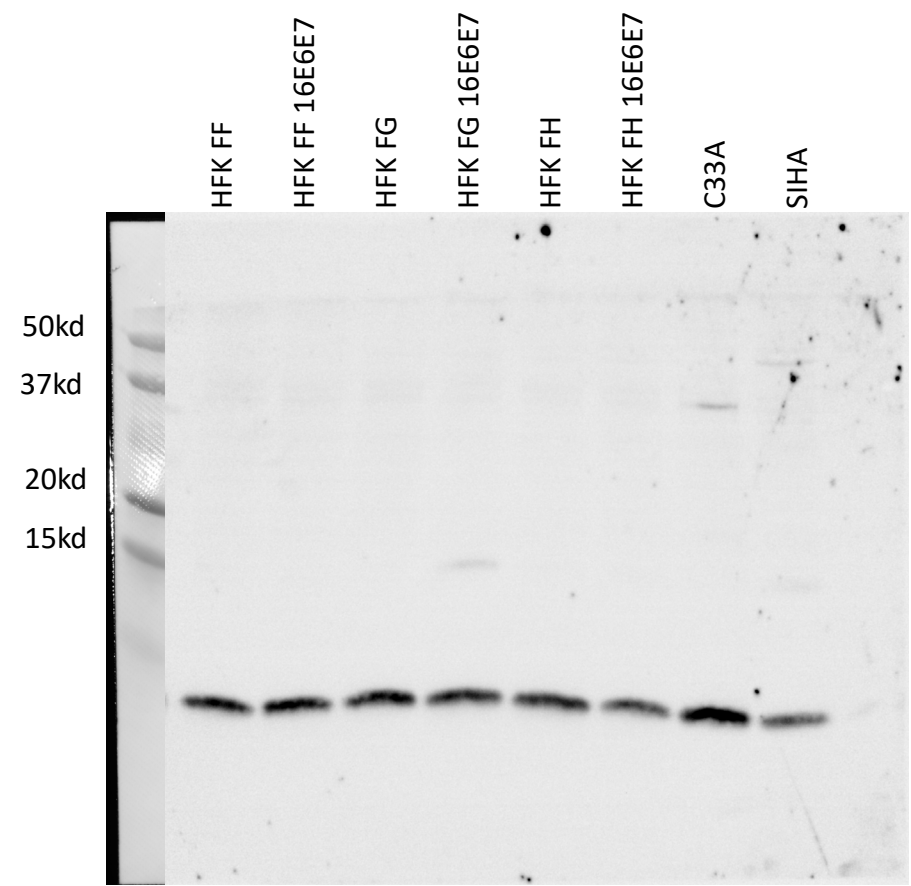



GAPDH 1:125,000  
Mouse-HRP 1:2500

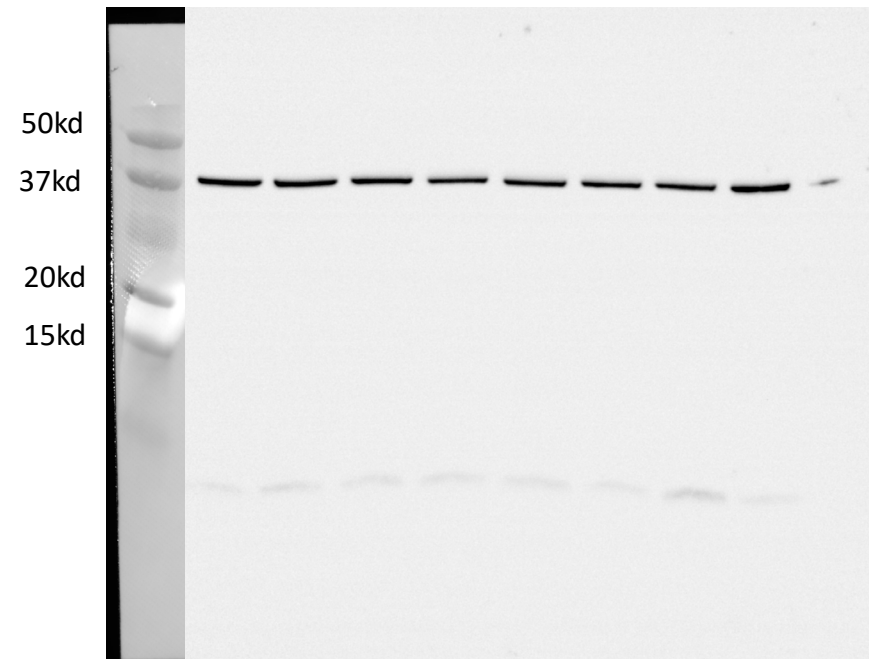

Supplement: s1 [file s1]
