# Supplementary material for: Cervical Cancer Development: Implications of HPV16 E6E7-NFX1-123 Regulated Genes
Source: MDPI journal article supplement (doi:10.3390/cancers13246182), 2021-12-08
Supplement: s1 [file s1]

## **Supplemental Table S1 – qPCR Primer and Probe Information and Immunoblot Antibody Information**

### **qPCR**

#### **Primers**

- KRT16
  - F – TCGAGGACCTGAGGAACAAG
  - R – GGGCCAGTTCATGCTCATAC
- NFX1-123
  - F – CCACAGCTTCCCTCCCA
  - R – CCTGGACGTCAAAATAGTCAA
- NOTCH1
  - F – GCCGAACCAATACAACCCTCTGC
  - R – GGTAGCTCATCATCTGGGACAGG
- 36B4
  - F – TGCCAGTGTCTGTCTGCAGA
  - R – ACAAAGGCAGATGGATCAGC

#### **Probes**

- CEBPD
  - HS00270931\_s1
- FBN2
  - Hs00266592\_m1
- GAPDH
  - Hs02786624\_g1
- LCE1B
  - HS00866755\_s1
- PPL
  - Hs01011417\_m1
- RAB7B
  - Hs01088520\_m1
- RPS29
  - Hs03004310\_g1
- SLPI
  - Hs00268204\_m1
- SPRR2G
  - HS00972901\_s1

**Immunoblot**

| <b>Antibody</b> | <b>Company/Cat. #</b>              | <b>Primary Dilution</b> | <b>Secondary</b> | <b>Secondary Dilution</b> |
|-----------------|------------------------------------|-------------------------|------------------|---------------------------|
| RAB7B           | Novus Biologicals – H00338382-B01P | 1:1200                  | Mouse-HRP        | 1:2500                    |
| NOTCH1          | Cell Signaling – #3447             | 1:1000                  | Rat-HRP          | 1:2000                    |
| SLPI            | R&D Systems – AF1274               | 1:500                   | Goat-HRP         | 1:2000                    |
| RPS29           | Abcam – ab56224                    | 1:2500                  | Rabbit-HRP       | 1:2000                    |
| FBN2            | ProteinTech – 20252-1-AP           | 1:750                   | Rabbit-HRP       | 1:2000                    |
| NFX1-123        | Homemade. Kind gift of Ann Roman.  | 1:1200                  | Rabbit-HRP       | 1:2000                    |
| FLAG            | Millipore-Sigma – F3165            | 1:1000                  | Mouse-HRP        | 1:2000                    |
| GAPDH           | Abcam – ab8245                     | 1:125,000               | Mouse-HRP        | 1:2500                    |
| p53             | Santa Cruz – sc-126                | 1:1500                  | Mouse-HRP        | 1:2500                    |
| Rb              | Cell Signaling – #9309             | 1:1500                  | Mouse-HRP        | 1:2500                    |

All blots and antibodies incubated in 4% non-fat dry milk in TBS-T
