# Supplementary material for: Cervical Cancer Development: Implications of HPV16 E6E7-NFX1-123 Regulated Genes
Source: Cancers (Basel). 2021 Dec 8;13(24):6182. doi: 10.3390/cancers13246182 (PMC8699269; doi:10.3390/cancers13246182)
Supplement: Supplementary file 1 [file cancers-13-06182-s001.zip]

Archive with 4 entries (4 files):
- cancers-1474260-suppl-figures.pdf
- Supplemental Data S1-Blots.pdf
- Supplemental Table S1.pdf
- Supplemental Table S2.xlsx
