# Supplementary material for: Cervical Cancer Development: Implications of HPV16 E6E7-NFX1-123 Regulated Genes
Source: Cancers (Basel). 2021 Dec 8;13(24):6182. doi: 10.3390/cancers13246182 (PMC8699269; doi:10.3390/cancers13246182)
Supplement: Supplementary file 1 [file cancers-13-06182-s001.zip › Supplemental Table S2.xlsx]

## Sheet: Sheet1
Correlated Gene	Cytoband	Spearman's Correlation	p-Value	q-Value
TOPORS	9p21.1	0.58622	1.24065e-29	2.48973e-25
CHMP5	9p13.3	0.562576	6.13701e-27	6.15788e-23
UBAP2	9p13.3	0.529903	1.49194e-23	9.9801e-20
NOL6	9p13.3	0.521453	9.79588e-23	4.9146e-19
DCAF10	9p13.2	0.519031	1.66398e-22	6.67854e-19
TRMT10B	9p13.2	0.497945	1.407e-20	4.70595e-17
DCAF12	9p13.3	0.49606	2.06162e-20	5.91036e-17
SMU1	9p21.1	0.487746	1.08061e-19	2.7107e-16
PIGO	9p13.3	0.443778	3.38185e-16	7.54078e-13
ZCCHC7	9p13.2	0.44191	4.64282e-16	9.31722e-13
KDM4C	9p24.1	0.434286	1.65905e-15	3.02672e-12
PLAA	9p21.2	0.424794	7.74899e-15	1.29589e-11
ZBTB5	9p13.2	0.422733	1.07598e-14	1.66098e-11
NUP214	9q34.13	0.42057	1.51501e-14	2.15059e-11
KIAA2026	9p24.1	0.420194	1.60748e-14	2.15059e-11
RANBP6	9p24.1	0.417785	2.34526e-14	2.94154e-11
SP1	12q13.13	0.416107	3.04537e-14	3.47138e-11
UBAP1	9p13.3	0.415965	3.11366e-14	3.47138e-11
CAAP1	9p21.2	0.408677	9.5207e-14	1.00559e-10
AK3	9p24.1	0.401561	2.76291e-13	2.7723e-10
RNF38	9p13.2	0.394586	7.66115e-13	7.32114e-10
SMC5	9q21.12	0.388551	1.81647e-12	1.65695e-09
TUT7	9q21.33	0.383114	3.89455e-12	3.39808e-09
KIF24	9p13.3	0.381773	4.6909e-12	3.92237e-09
KLHL9	9p21.3	0.380896	5.29517e-12	4.25054e-09
FBXW2	9q33.2	0.378609	7.25072e-12	5.59644e-09
APTX	9p21.1	0.376872	9.19028e-12	6.83076e-09
MCRIP1	17q25.3	-0.376376	9.83182e-12	7.0466e-09
ERI3	1p34.1	-0.375572	1.09644e-11	7.58737e-09
MRRF	9q33.2	0.370476	2.17376e-11	1.4541e-08
BAG1	9p13.3	0.368801	2.71497e-11	1.75755e-08
GOLGA2	9q34.11	0.366506	3.67408e-11	2.3041e-08
C9ORF72	9p21.2	0.361682	6.88676e-11	4.18799e-08
P3H1	1p34.2	-0.360816	7.70047e-11	4.54509e-08
B3GAT3	11q12.3	-0.358045	1.09821e-10	6.29682e-08
PTAR1	9q21.12	0.353939	1.84704e-10	1.02962e-07
PSMD5	9q33.2	0.353511	1.94885e-10	1.05702e-07
GNL1	6p21.33	-0.353204	2.02558e-10	1.06972e-07
ZBTB6	9q33.2	0.35296	2.08846e-10	1.07464e-07
ZBTB43	9q33.3	0.352621	2.17879e-10	1.0931e-07
ACO1	9p21.1	0.352422	2.2338e-10	1.09336e-07
TSTD2	9q22.33	0.351177	2.60935e-10	1.24677e-07
GAPVD1	9q33.3	0.350772	2.74403e-10	1.2752e-07
ARHGEF39	9p13.3	0.350621	2.79593e-10	1.2752e-07
TRIM35	8p21.2	0.350003	3.01888e-10	1.34629e-07
UNC13B	9p13.3	0.349271	3.30514e-10	1.4419e-07
NOL8	9q22.31	0.347446	4.1392e-10	1.76735e-07
CCDC28B	1p35.2	-0.347082	4.32836e-10	1.80962e-07
CDC37L1	9p24.1	0.346328	4.74727e-10	1.94425e-07
TSC1	9q34.13	0.34557	5.20783e-10	2.06626e-07
ZNF658	9q21.11	0.345409	5.31131e-10	2.06626e-07
TJP2	9q21.11	0.345343	5.35408e-10	2.06626e-07
GOLGA1	9q33.3	0.342472	7.58528e-10	2.8721e-07
GBA2	9p13.3	0.342228	7.81209e-10	2.9032e-07
NEU1	6p21.33	-0.34105	9.0018e-10	3.28451e-07
AGPAT1	6p21.32	-0.340177	9.99611e-10	3.58218e-07
SIGMAR1	9p13.3	0.339376	1.10011e-09	3.87315e-07
ABITRAM	9q31.3	0.338294	1.25147e-09	4.3301e-07
UBE2R2	9p13.3	0.335729	1.6955e-09	5.76701e-07
UHRF2	9p24.1	0.334702	1.91312e-09	6.39874e-07
NAA35	9q21.33	0.334383	1.98612e-09	6.53402e-07
NUDC	1p36.11	-0.332475	2.48249e-09	7.97394e-07
TUBB	6p21.33	-0.332403	2.50328e-09	7.97394e-07
MELK	9p13.2	0.332207	2.56105e-09	8.03051e-07
ALAD	9q32	0.331932	2.64422e-09	8.16372e-07
KCTD9	8p21.2	0.331077	2.92032e-09	8.87956e-07
ZNF169	9q22.32	0.330271	3.20592e-09	9.60244e-07
ABHD8	19p13.11	-0.32964	3.44803e-09	1.0036e-06
B4GALT7	5q35.3	-0.329633	3.4507e-09	1.0036e-06
RIC1	9p24.1	0.327858	4.23174e-09	1.21318e-06
FAAP20	1p36.33	-0.327368	4.47585e-09	1.26509e-06
TBCB	19q13.12	-0.324646	6.10084e-09	1.70044e-06
NSRP1	17q11.2	0.32422	6.40204e-09	1.74507e-06
UROD	1p34.1	-0.324175	6.43486e-09	1.74507e-06
KLRA1P	12p13.2	0.323772	6.73413e-09	1.80187e-06
KLHDC3	6p21.1	-0.323037	7.3162e-09	1.91931e-06
CDC34	19p13.3	-0.322979	7.3643e-09	1.91931e-06
PLA2G15	16q22.1	-0.322701	7.59795e-09	1.95482e-06
FUBP3	9q34.11-q34.12	0.321873	8.33767e-09	2.11798e-06
SLC25A51	9p13.2-p13.1	0.320931	9.26445e-09	2.32399e-06
TTF1	9q34.13	0.32069	9.51738e-09	2.34351e-06
C9ORF85	9q21.13	0.320635	9.57584e-09	2.34351e-06
TWF2	3p21.2	-0.320466	9.75829e-09	2.35939e-06
GLE1	9q34.11	0.319965	1.03184e-08	2.46511e-06
POLR2G	11q12.3	-0.319281	1.1134e-08	2.62868e-06
TRMO	9q22.33	0.317988	1.28484e-08	2.99816e-06
MANF	3p21.2	-0.31783	1.30751e-08	3.01599e-06
ZNF189	9q31.1	0.31766	1.33223e-08	3.03808e-06
FAM120A	9q22.31	0.317431	1.36639e-08	3.08098e-06
STX17	9q31.1	0.316738	1.47472e-08	3.28831e-06
ZNF79	9q33.3	0.316487	1.5159e-08	3.34297e-06
SVBP	1p34.2	-0.316177	1.56853e-08	3.42145e-06
FKBP15	9q32	0.31572	1.64907e-08	3.55845e-06
FAM122A	9q21.11	0.313348	2.13633e-08	4.56084e-06
VPS13A	9q21.2	0.313214	2.16746e-08	4.57858e-06
CUTA	6p21.32	-0.313111	2.19193e-08	4.58206e-06
PTPN3	9q31.3	0.311465	2.61937e-08	5.41913e-06
TTC39B	9p22.3	0.31111	2.72136e-08	5.57268e-06
ZCCHC8	12q24.31	0.310332	2.95886e-08	5.99781e-06
PCF11	11q14.1	0.310222	2.99407e-08	6.0085e-06
CNTRL	9q33.2	0.309885	3.10452e-08	6.16847e-06
WDR46	6p21.32	-0.309687	3.17116e-08	6.2391e-06
LMAN2L	2q11.2	-0.30943	3.25958e-08	6.35079e-06
AQP3	9p13.3	0.308885	3.45519e-08	6.65294e-06
NSD3	8p11.23	0.308779	3.49452e-08	6.65294e-06
MTAP	9p21.3	0.308727	3.51411e-08	6.65294e-06
PTBP3	9q32	0.308198	3.71795e-08	6.97306e-06
PPP6C	9q33.3	0.307579	3.97137e-08	7.3475e-06
RASEF	9q21.32	0.307533	3.99082e-08	7.3475e-06
CCDC167	6p21.2	-0.305197	5.11009e-08	9.32266e-06
ARHGAP27	17q21.31	0.304967	5.23573e-08	9.46583e-06
ZC3H11A	1q32.1	0.304745	5.35936e-08	9.60282e-06
SHISA4	1q32.1	-0.303838	5.89473e-08	1.04686e-05
CALR	19p13.13	-0.303636	6.0213e-08	1.05996e-05
IFT74	9p21.2	0.301829	7.27146e-08	1.2689e-05
PLEKHM1P1	17q24.1	0.301674	7.3893e-08	1.27835e-05
ZNF782	9q22.33	0.301069	7.86876e-08	1.33653e-05
CD2BP2	16p11.2	-0.301025	7.90474e-08	1.33653e-05
CAMSAP1	9q34.3	0.301	7.92538e-08	1.33653e-05
BAD	11q13.1	-0.30056	8.29498e-08	1.3872e-05
PHF2	9q22.31	0.299144	9.60135e-08	1.5924e-05
MON2	12q14.1	0.298812	9.93529e-08	1.63427e-05
RAB14	9q33.2	0.298303	1.04687e-07	1.70802e-05
COPRS	17q11.2	-0.297887	1.0926e-07	1.76826e-05
LINC00319	21q22.3	0.297802	1.10212e-07	1.76939e-05
KNTC1	12q24.31	0.297577	1.12776e-07	1.79618e-05
MAD2L2	1p36.22	-0.297014	1.1947e-07	1.88782e-05
ECPAS	9q31.3	0.296713	1.23196e-07	1.93148e-05
EXOC8	1q42.2	0.296435	1.26741e-07	1.97165e-05
VCP	9p13.3	0.295882	1.34087e-07	2.06989e-05
TEDDM1	1q25.3	0.295129	1.44737e-07	2.2066e-05
ZDHHC21	9p22.3	0.295102	1.45142e-07	2.2066e-05
SDE2	1q42.12	0.294903	1.48106e-07	2.23354e-05
IPPK	9q22.31	0.294834	1.4914e-07	2.23354e-05
FZD2	17q21.31	-0.294705	1.51096e-07	2.24607e-05
KCTD3	1q41	0.29452	1.53961e-07	2.27182e-05
FAM120AOS	9q22.31	0.294422	1.55495e-07	2.27772e-05
RREB1	6p24.3	0.294222	1.58662e-07	2.30727e-05
OTUB1	11q13.1	-0.294108	1.605e-07	2.3172e-05
TBC1D7	6p24.1	-0.293269	1.7469e-07	2.50406e-05
FIBP	11q13.1	-0.293125	1.77228e-07	2.52242e-05
HAUS6	9p22.1	0.292539	1.88e-07	2.65689e-05
SLC39A7	6p21.32	-0.291617	2.06206e-07	2.8938e-05
EVA1B	1p34.3	-0.291511	2.08413e-07	2.90446e-05
MEA1	6p21.1	-0.291238	2.14173e-07	2.96416e-05
SMARCA2	9p24.3	0.290746	2.24951e-07	3.092e-05
COMMD7	20q11.21	-0.290651	2.27104e-07	3.10035e-05
SNRPC	6p21.31	-0.289915	2.4436e-07	3.30971e-05
BTAF1	10q23.32	0.289859	2.45738e-07	3.30971e-05
C12ORF66	12q14.2	0.289033	2.66732e-07	3.56852e-05
SPDYE1	7p13	0.288678	2.76269e-07	3.67164e-05
MARCKSL1	1p35.1	-0.288419	2.83445e-07	3.74223e-05
SMC2	9q31.1	0.287532	3.09367e-07	4.05777e-05
HSDL2	9q32	0.287011	3.2566e-07	4.24373e-05
ELK4	1q32.1	0.286713	3.35345e-07	4.34174e-05
FANCG	9p13.3	0.286535	3.41243e-07	4.38978e-05
OCLM	1q31.1	0.286415	3.45282e-07	4.39195e-05
ZNF510	9q22.33	0.2864	3.45788e-07	4.39195e-05
NUP188	9q34.11	0.286265	3.50407e-07	4.40532e-05
MRPL11	11q13.2	-0.286194	3.52861e-07	4.40532e-05
RNF207	1p36.31	0.286177	3.53426e-07	4.40532e-05
ANKRD39	2q11.2	-0.285867	3.6432e-07	4.51231e-05
GEN1	2p24.2	0.285806	3.66507e-07	4.51231e-05
ARL3	10q24.32	-0.285	3.96566e-07	4.83979e-05
SPTLC1	9q22.31	0.284964	3.9793e-07	4.83979e-05
OR10AD1	12q13.11	0.284862	4.01932e-07	4.85902e-05
CSNK2B	6p21.33	-0.284663	4.09802e-07	4.9245e-05
LCMT1	16p12.1	-0.284033	4.35692e-07	5.20445e-05
SPATA46	1q23.3	0.283898	4.41453e-07	5.24206e-05
GPX4	19p13.3	-0.283528	4.57594e-07	5.40177e-05
DIP2A	21q22.3	0.283374	4.64485e-07	5.45105e-05
FGD4	12p11.21	0.283234	4.70845e-07	5.48757e-05
FKTN	9q31.2	0.283185	4.73067e-07	5.48757e-05
REEP2	5q31.2	-0.282821	4.90052e-07	5.65193e-05
IARS	9q22.31	0.282543	5.03407e-07	5.77279e-05
TUBA1A	12q13.12	-0.282159	5.22406e-07	5.9382e-05
PIAS1	15q23	0.282114	5.24679e-07	5.9382e-05
C1ORF122	1p34.3	-0.282074	5.26709e-07	5.9382e-05
STK19	6p21.33	-0.281805	5.40541e-07	6.0601e-05
EHMT1	9q34.3	0.281709	5.45603e-07	6.08286e-05
RCL1	9p24.1	0.281575	5.52667e-07	6.12759e-05
RALGDS	9q34.13-q34.2	0.280997	5.84254e-07	6.4422e-05
PLPP6	9p24.1	0.280878	5.90989e-07	6.48086e-05
MFSD2B	2p23.3	-0.280671	6.02827e-07	6.55514e-05
CTSZ	20q13.32	-0.280646	6.04296e-07	6.55514e-05
ZFC3H1	12q21.1	0.280014	6.41989e-07	6.92658e-05
BLZF1	1q24.2	0.279679	6.62917e-07	7.11413e-05
ARHGAP32	11q24.3	0.279452	6.77447e-07	7.23139e-05
RRP36	6p21.1	-0.279372	6.8264e-07	7.24826e-05
SETX	9q34.13	0.279225	6.92255e-07	7.31167e-05
RMI1	9q21.32	0.279051	7.03824e-07	7.36138e-05
LIN9	1q42.12	0.279043	7.04386e-07	7.36138e-05
UBTD1	10q24.1-q24.2	-0.27899	7.07966e-07	7.36138e-05
ST3GAL3	1p34.1	-0.278723	7.26158e-07	7.51162e-05
PRPF4	9q32	0.27849	7.42428e-07	7.64053e-05
LEMD2	6p21.31	-0.278395	7.4923e-07	7.6712e-05
TBC1D2	9q22.33	0.278145	7.67215e-07	7.808e-05
PGBD4	15q14	0.27803	7.75652e-07	7.808e-05
PPTC7	12q24.11	0.278021	7.76269e-07	7.808e-05
ASPM	1q31.3	0.277996	7.78154e-07	7.808e-05
C1ORF50	1p34.2	-0.27794	7.82279e-07	7.81034e-05
C1ORF216	1p34.3	-0.277738	7.97451e-07	7.9224e-05
MTCH1	6p21.2	-0.277403	8.23131e-07	8.09813e-05
CDKN2B-AS1	9p21.3	0.277402	8.23211e-07	8.09813e-05
CLIP1	12q24.31	0.277329	8.28897e-07	8.11429e-05
DGKA	12q13.2	0.277241	8.35893e-07	8.14306e-05
CEP350	1q25.2	0.277006	8.54681e-07	8.28586e-05
RBM33	7q36.3	0.276808	8.708e-07	8.40155e-05
ABHD17B	9q21.13	0.275387	9.95517e-07	9.55887e-05
C9ORF131	9p13.3	0.274829	1.0491e-06	0.000100254
GGA3	17q25.1	0.274714	1.0605e-06	0.000100863
BAG4	8p11.23	0.27459	1.07288e-06	0.000101476
CARNMT1	9q21.13	0.274548	1.07706e-06	0.000101476
ATP6V0B	1p34.1	-0.274352	1.09704e-06	0.000102788
RNF5	6p21.32	-0.274311	1.10122e-06	0.000102788
CTSF	11q13.2	-0.274145	1.11848e-06	0.000103915
B4GAT1	11q13.2	-0.273842	1.15062e-06	0.000106409
PDRG1	20q11.21	-0.273684	1.16766e-06	0.000107489
CDKN2B	9p21.3	0.273615	1.17521e-06	0.00010769
PTK7	6p21.1	-0.273348	1.20482e-06	0.000109901
PLOD1	1p36.22	-0.27295	1.25034e-06	0.000113538
S1PR2	19p13.2	-0.272747	1.27414e-06	0.000115177
NEK7	1q31.3	0.272521	1.30125e-06	0.000117101
CYP2C19	10q23.33	0.272182	1.34281e-06	0.000120057
FOSL2	2p23.2	0.272156	1.34607e-06	0.000120057
TRIM66	11p15.4	0.271735	1.39967e-06	0.000124065
ZFP3	17p13.2	0.271706	1.40336e-06	0.000124065
RBAK	7p22.1	0.271602	1.41698e-06	0.000124439
SNTA1	20q11.21	-0.271579	1.42e-06	0.000124439
FAM229B	6q21	-0.271522	1.42751e-06	0.000124553
MEF2A	15q26.3	0.271405	1.44302e-06	0.000125361
EMID1	22q12.2	-0.270618	1.55171e-06	0.000134223
BRMS1	11q13.2	-0.270446	1.57658e-06	0.000135789
RASAL2	1q25.2	0.27039	1.5847e-06	0.000135905
LOC646471	1p36.11	0.270338	1.59229e-06	0.000135975
EHMT2	6p21.33	-0.270019	1.63981e-06	0.00013944
SMG7	1q25.3	0.269843	1.66648e-06	0.000141109
MNT	17p13.3	0.26969	1.69012e-06	0.000142509
SPNS1	16p11.2	-0.269388	1.73762e-06	0.000145902
FAM89B	11q13.1	-0.269217	1.76513e-06	0.000147394
CNPY3	6p21.1	-0.269186	1.77008e-06	0.000147394
GPR107	9q34.11	0.268922	1.81346e-06	0.000150382
GPRC5D	12p13.1	0.268839	1.82729e-06	0.000150607
PPP1R15B	1q32.1	0.2688	1.83373e-06	0.000150607
PTMAP11	9q22.33	0.268736	1.84464e-06	0.000150607
ELP1	9q31.3	0.268716	1.84791e-06	0.000150607
STAT6	12q13.3	0.268677	1.85451e-06	0.000150607
CTXN1	19p13.2	-0.268638	1.8612e-06	0.000150607
ZBTB26	9q33.2	0.26857	1.87285e-06	0.000150941
LSM10	1p34.3	-0.268353	1.91021e-06	0.000153336
DENND4C	9p22.1	0.267806	2.00813e-06	0.000160554
MYORG	9p13.3	0.267747	2.01896e-06	0.00016078
TMEM253	14q11.2	0.267328	2.09736e-06	0.000166363
SNX30	9q32	0.267124	2.13671e-06	0.000168817
SPIN1	9q22.1	0.266954	2.16985e-06	0.00017054
DOCK5	8p21.2	0.266926	2.17552e-06	0.00017054
PFDN4	20q13.2	-0.266799	2.20073e-06	0.000171846
IFT52	20q13.12	-0.266504	2.26049e-06	0.000175827
ANKRD49	11q21	0.266029	2.35977e-06	0.000182221
RABGAP1	9q33.2-q33.3	0.266024	2.36085e-06	0.000182221
RICTOR	5p13.1	0.265912	2.38495e-06	0.000183376
OSTF1	9q21.13	0.265471	2.48192e-06	0.000190104
VPS51	11q13.1	-0.265184	2.54702e-06	0.000193693
CFL1	11q13.1	-0.265179	2.54808e-06	0.000193693
FTH1	11q12.3	-0.264906	2.61158e-06	0.00019777
ZNF131	5p12	0.264722	2.65528e-06	0.00020032
PTOV1	19q13.33	-0.26468	2.66521e-06	0.00020032
POMGNT1	1p34.1	-0.264314	2.75452e-06	0.00020626
MDM4	1q32.1	0.2642	2.78286e-06	0.000207607
GTF2H4	6p21.33	-0.264034	2.82472e-06	0.00020995
MYO1E	15q22.2	0.263933	2.85032e-06	0.000211071
CORO2A	9q22.33	0.263864	2.86805e-06	0.000211603
UBXN1	11q12.3	-0.263535	2.95395e-06	0.00021652
NAT14	19q13.42	-0.263526	2.95628e-06	0.00021652
UBE2E3	2q31.3	-0.263465	2.9724e-06	0.00021691
PSMA7	20q13.33	-0.26326	3.02752e-06	0.000219971
DENND4A	15q22.31	0.263228	3.03627e-06	0.000219971
IFT22	7q22.1	-0.263145	3.05899e-06	0.00022082
BMS1P1	10q11.22	0.263093	3.07324e-06	0.000221053
DMAP1	1p34.1	-0.262759	3.16618e-06	0.000226924
SLTM	15q22.1	0.262513	3.23654e-06	0.000231142
ZNF484	9q22.31	0.262133	3.34816e-06	0.000238265
CDK5RAP2	9q33.2	0.261866	3.42864e-06	0.00024313
ZNF367	9q22.32|9q22.32	0.261778	3.45544e-06	0.000244168
SDHD	11q23.1	0.261618	3.50495e-06	0.000246798
ASB7	15q26.3	0.261238	3.62537e-06	0.000253743
C9ORF129	9q22.31	0.261227	3.62887e-06	0.000253743
XPO7	8p21.3	0.261183	3.6432e-06	0.00025386
RAB34	17q11.2	-0.260916	3.73043e-06	0.000259039
CLEC11A	19q13.33	-0.260747	3.78678e-06	0.000262045
PALB2	16p12.2	0.260658	3.81681e-06	0.000263216
PLEKHO1	1q21.2	-0.260604	3.83497e-06	0.000263562
STIP1	11q13.1	-0.260432	3.89398e-06	0.000266704
TBK1	12q14.2	0.260154	3.99076e-06	0.000272403
SPG11	15q21.1	0.260111	4.00585e-06	0.000272507
PIN1	19p13.2	-0.259518	4.22107e-06	0.000286177
FGF7P3	9p12	0.25923	4.32957e-06	0.000292545
SH2D4A	8p21.3	0.259019	4.41057e-06	0.000297018
ZNF800	7q31.33	0.258886	4.46253e-06	0.000299512
C11ORF49	11p11.2	-0.258777	4.50544e-06	0.000301384
SERPINH1	11q13.5	-0.258279	4.70691e-06	0.000313815
FOXP2	7q31.1	0.258164	4.75448e-06	0.000315185
SMYD4	17p13.3	0.258154	4.75887e-06	0.000315185
PPIP5K1	15q15.3	0.258015	4.8172e-06	0.000317999
HERC1	15q22.31	0.257966	4.83792e-06	0.000318319
TMED9	5q35.3	-0.257894	4.86817e-06	0.00031869
C1ORF226	1q23.3	0.257878	4.87532e-06	0.00031869
CENPC	4q13.2	0.257698	4.9524e-06	0.000322678
TAOK3	12q24.23	0.257594	4.99796e-06	0.000324304
RPRD2	1q21.2	0.257567	5.00968e-06	0.000324304
TRIM67	1q42.2	0.257516	5.03189e-06	0.000324694
IRAK4	12q12	0.257357	5.1024e-06	0.000328189
AQR	15q14	0.257293	5.13122e-06	0.000328988
PTK6	20q13.33	0.256824	5.34538e-06	0.000340866
LINC01000	7q32.1	0.256813	5.35045e-06	0.000340866
MYBL2	20q13.12	-0.256776	5.36786e-06	0.000340893
THEM5	1q21.3	0.256714	5.3966e-06	0.000341637
ZNF771	16p11.2	-0.25653	5.48385e-06	0.000346069
AGAP5	10q22.2	0.256434	5.52982e-06	0.000347876
KLHL20	1q25.1	0.256291	5.59904e-06	0.00035113
KLF5	13q22.1	0.256094	5.696e-06	0.000355225
HSD17B10	Xp11.22	-0.256086	5.69974e-06	0.000355225
CMIP	16q23.2-q23.3	0.256016	5.7349e-06	0.000356309
DCTN6	8p12	0.255906	5.78981e-06	0.000358611
PPP2R5D	6p21.1	-0.255862	5.81175e-06	0.000358862
GTF3C2	2p23.3	0.255476	6.00995e-06	0.000369962
CTNNBL1	20q11.23	-0.255087	6.21547e-06	0.000379637
JAK2	9p24.1	0.255077	6.22133e-06	0.000379637
VKORC1	16p11.2	-0.255059	6.23103e-06	0.000379637
ACBD5	10p12.1	0.255037	6.24278e-06	0.000379637
ZNF224	19q13.31	0.254974	6.27703e-06	0.000379709
CNPY4	7q22.1	-0.254965	6.28181e-06	0.000379709
ZNF358	19p13.2	-0.254819	6.36125e-06	0.000383356
PPARA	22q13.31	0.254566	6.50228e-06	0.000390682
UBE3B	12q24.11	0.254408	6.59127e-06	0.000394847
ERGIC3	20q11.22	-0.254147	6.74129e-06	0.000402631
RASSF5	1q32.1	0.253785	6.95497e-06	0.000414161
GPR137	11q13.1	-0.253565	7.08779e-06	0.000420822
RAPGEFL1	17q21.1	0.253416	7.17948e-06	0.000424094
CEP152	15q21.1	0.253406	7.18517e-06	0.000424094
DTNBP1	6p22.3	-0.253254	7.28015e-06	0.00042844
INTS7	1q32.3	0.252913	7.49576e-06	0.000439839
EEA1	12q22	0.252542	7.73795e-06	0.000451508
MBD6	12q13.3	0.25254	7.73962e-06	0.000451508
RANBP1	22q11.21	-0.252423	7.81715e-06	0.000454683
DCST1	1q21.3	0.252387	7.84127e-06	0.000454683
HDGFL2	19p13.3	-0.252331	7.87931e-06	0.000454683
RGP1	9p13.3	0.252323	7.88467e-06	0.000454683
ZBTB7B	1q21.3	0.252146	8.00475e-06	0.000460285
ROMO1	20q11.22	-0.252105	8.03289e-06	0.000460583
FNBP4	11p11.2	0.251546	8.42533e-06	0.000481708
THOC5	22q12.2	-0.251146	8.71771e-06	0.000497009
SLC24A5	15q21.1	-0.251066	8.77712e-06	0.000498978
SCAND1	20q11.23	-0.251022	8.80986e-06	0.000499425
CCDC85B	11q13.1	-0.250711	9.04641e-06	0.00051139
SDF2L1	22q11.21	-0.250607	9.12627e-06	0.000513112
EXOSC3	9p13.2	0.250595	9.13569e-06	0.000513112
YTHDC1	4q13.2	0.250572	9.15358e-06	0.000513112
TPR	1q31.1	0.250171	9.47059e-06	0.000529403
BROX	1q41	0.25012	9.51137e-06	0.000530042
PHC2	1p35.1	-0.250091	9.53503e-06	0.000530042
ZNF121	19p13.2	0.250059	9.56125e-06	0.000530042
SPRTN	1q42.2	0.249725	9.83526e-06	0.00054373
ABRACL	6q24.1	-0.249628	9.91609e-06	0.000546693
NDUFB6	9p21.1	0.249507	1.00181e-05	0.000550804
ERI1	8p23.1	0.249475	1.00458e-05	0.000550819
SECISBP2	9q22.2	0.24909	1.03771e-05	0.00056743
LRWD1	7q22.1	-0.248977	1.04773e-05	0.000571096
VPS37A	8p22	0.24895	1.0501e-05	0.000571096
PSMD2	3q27.1	-0.248907	1.05393e-05	0.000571628
POMK	8p11.21	0.248872	1.05704e-05	0.00057177
SLK	10q24.33-q25.1	0.248783	1.065e-05	0.000574529
YIPF3	6p21.1	-0.248724	1.07032e-05	0.000575848
ZDHHC11	5p15.33	0.248629	1.07889e-05	0.000578906
CSTF2T	10q21.1	0.248556	1.08557e-05	0.000580938
SF3B5	6q24.2	-0.248267	1.11229e-05	0.000593657
CYP2C9	10q23.33	0.248167	1.12164e-05	0.00059471
DDAH2	6p21.33	-0.248156	1.12268e-05	0.00059471
ZNF678	1q42.13	0.248151	1.12316e-05	0.00059471
ASH1L	1q22	0.248056	1.13213e-05	0.000597883
CCDC92	12q24.31	-0.248012	1.1364e-05	0.000598564
TMEM245	9q31.3	0.247919	1.14531e-05	0.000601678
VEGFB	11q13.1	-0.247745	1.16215e-05	0.000608928
RPP25L	9p13.3	0.24768	1.16849e-05	0.00061066
GNE	9p13.3	0.247642	1.17219e-05	0.000611003
AURKAIP1	1p36.33	-0.247347	1.20153e-05	0.000623045
C1ORF116	1q32.1	0.247335	1.2028e-05	0.000623045
RAB27B	18q21.2	0.247317	1.20461e-05	0.000623045
KCNV2	9p24.2	0.247239	1.21249e-05	0.000625508
LTN1	21q21.3	0.247173	1.21924e-05	0.000627375
PRRC2B	9q34.13	0.247125	1.22412e-05	0.000628276
RTRAF	14q22.1	-0.246937	1.24353e-05	0.000636612
EEF1E1	6p24.3	-0.246904	1.24698e-05	0.000636752
RBBP6	16p12.1	0.24687	1.25048e-05	0.000636918
LYPLA2	1p36.11	-0.24679	1.25895e-05	0.000639613
C16ORF46	16q23.2	-0.246684	1.27006e-05	0.000643627
CABYR	18q11.2	-0.246491	1.29071e-05	0.000651099
CDC20	1p34.2	-0.246486	1.2913e-05	0.000651099
GALT	9p13.3	0.246316	1.30975e-05	0.000658747
RPL23AP64	11q23.3	0.246195	1.32304e-05	0.000663772
C11ORF42	11p15.4	0.246112	1.3322e-05	0.000666698
RALY	20q11.22	-0.245397	1.41384e-05	0.000704139
SCAI	9q33.3	0.245396	1.41403e-05	0.000704139
KAT6A	8p11.21	0.245189	1.43849e-05	0.000714546
INIP	9q32	0.245059	1.45415e-05	0.00072054
YOD1	1q32.1	0.244958	1.4663e-05	0.000724773
CDK17	12q23.1	0.244737	1.49343e-05	0.000734499
LCMT2	15q15.3	0.244719	1.49566e-05	0.000734499
TLN1	9p13.3	0.244709	1.49696e-05	0.000734499
MFAP2	1p36.13	-0.244637	1.50592e-05	0.000736704
HGSNAT	8p11.21-p11.1	0.244614	1.5088e-05	0.000736704
PITPNM3	17p13.2-p13.1	0.244577	1.51346e-05	0.000737188
LTBP3	11q13.1	-0.244395	1.53641e-05	0.000746552
TARBP1	1q42.2	0.244304	1.548e-05	0.000750369
CNTLN	9p22.2	0.244026	1.584e-05	0.000765968
SNORD1C	17q25.1	0.243965	1.59191e-05	0.000767942
MINK1	17p13.2	0.243823	1.61074e-05	0.000775162
GNAQ	9q21.2	0.243446	1.66166e-05	0.000797754
BID	22q11.21	-0.243223	1.69243e-05	0.000810591
MED13L	12q24.21	0.243156	1.7018e-05	0.000813134
FTH1P3	2p23.3	-0.24303	1.71954e-05	0.000819661
MCPH1	8p23.1	0.242936	1.7328e-05	0.000824025
MGA	15q15.1	0.242656	1.77323e-05	0.000841255
SCYL1	11q13.1	-0.242613	1.77952e-05	0.000842249
KMT2C	7q36.1	0.242577	1.78479e-05	0.000842757
LSM2	6p21.33	-0.242219	1.838e-05	0.000864292
MAN2B1	19p13.13	-0.242212	1.83901e-05	0.000864292
SHOC1	9q31.3	0.242145	1.84919e-05	0.000865061
USP15	12q14.1	0.242144	1.84927e-05	0.000865061
SMPD1	11p15.4	-0.242082	1.85862e-05	0.000867414
PRPF38B	1p13.3	0.241968	1.87611e-05	0.000871522
UBE2J2	1p36.33	-0.241968	1.87611e-05	0.000871522
PIK3C2B	1q32.1	0.241796	1.90273e-05	0.000881849
TMOD3	15q21.2	0.241553	1.94091e-05	0.000897472
MYL4	17q21.32	-0.241513	1.94735e-05	0.00089838
PRRC2C	1q24.3	0.241342	1.97468e-05	0.000908897
ZNF37A	10p11.1	0.241275	1.98552e-05	0.000911673
EIF2B3	1p34.1	-0.241249	1.9898e-05	0.000911673
BMS1P4	10q22.2	0.241093	2.01518e-05	0.000921197
MED16	19p13.3	-0.241002	2.03033e-05	0.000926013
SUGT1P1	9p13.3	0.24076	2.0707e-05	0.000942286
CLPX	15q22.31	0.240647	2.08981e-05	0.000948828
ODR4	1q31.1	0.240568	2.10332e-05	0.000952807
CCZ1P-OR7E38P	7q21.3	-0.240239	2.16033e-05	0.000975861
IKBKB	8p11.21	0.240219	2.16393e-05	0.000975861
DPCD	10q24.32	-0.240125	2.18042e-05	0.000981091
PLEKHA1	10q26.13	0.239977	2.20684e-05	0.000990756
CEP295	11q21	0.23983	2.23333e-05	0.00100005
PRR7	5q35.3	-0.239804	2.23804e-05	0.00100005
UBE2F	2q37.3	-0.23974	2.24963e-05	0.00100005
PRDM10	11q24.3	0.239728	2.25192e-05	0.00100005
OAZ2	15q22.31	-0.239725	2.25245e-05	0.00100005
RPN2	20q11.23	-0.239549	2.28489e-05	0.00101221
ACBD3	1q42.12	0.239394	2.31368e-05	0.00102271
ZNF593	1p36.11	-0.239335	2.32485e-05	0.00102538
ZNF354B	5q35.3	0.239289	2.33353e-05	0.00102696
ATP6AP1	Xq28	-0.239255	2.33987e-05	0.0010275
EDEM2	20q11.22	-0.239157	2.3585e-05	0.00103342
THAP3	1p36.31	-0.239064	2.37631e-05	0.00103895
RSBN1L	7q11.23	0.239014	2.38599e-05	0.00103999
FAM83B	6p12.1	0.238991	2.39043e-05	0.00103999
R3HDM2	12q13.3	0.238971	2.39424e-05	0.00103999
DRAP1	11q13.1	-0.238815	2.42458e-05	0.0010509
FAM167B	1p35.2	-0.238749	2.43766e-05	0.00105213
INO80D	2q33.3	0.238747	2.43791e-05	0.00105213
IQGAP3	1q22	0.238631	2.46093e-05	0.00105883
KIF27	9q21.32	0.2386	2.46702e-05	0.00105883
FIG4	6q21	-0.238589	2.46927e-05	0.00105883
CCNT1	12q13.11-q13.12	0.238508	2.48543e-05	0.00106349
WTIP	19q13.11	-0.238466	2.49392e-05	0.00106384
LYRM4	6p25.1	-0.238451	2.49704e-05	0.00106384
INE1	Xp11.3	0.238425	2.50215e-05	0.00106384
B4GALT1	9p21.1	0.23837	2.51338e-05	0.00106635
TRIM52	5q35.3	0.238225	2.54282e-05	0.00107657
SKP1	5q31.1	-0.23795	2.59972e-05	0.00109834
PDK3	Xp22.11	-0.237901	2.61017e-05	0.00110044
TPRA1	3q21.3	-0.237623	2.66902e-05	0.00112289
TXNDC12	1p32.3	-0.237438	2.70911e-05	0.00113687
SART1	11q13.1	-0.237417	2.71358e-05	0.00113687
ZNF624	17p11.2	0.237357	2.72675e-05	0.0011379
STOX2	4q35.1	0.237354	2.72737e-05	0.0011379
RHBDD3	22q12.2	-0.237321	2.73464e-05	0.00113857
MYL6	12q13.2	-0.237287	2.74201e-05	0.00113927
ANKRD12	18p11.22	0.237116	2.77995e-05	0.00114924
ZNF596	8p23.3	0.237073	2.78959e-05	0.00114924
SLC25A33	1p36.22	-0.237061	2.7923e-05	0.00114924
FAM234A	16p13.3	-0.237053	2.79418e-05	0.00114924
PUM2	2p24.1	0.23705	2.79465e-05	0.00114924
STUB1	16p13.3	-0.236955	2.81603e-05	0.00115567
UGCG	9q31.3	0.236826	2.84538e-05	0.00116533
TNFRSF10A	8p21.3	0.236789	2.85389e-05	0.00116643
VPS36	13q14.3	0.23662	2.89271e-05	0.00117987
DDX31	9q34.13	0.236595	2.89854e-05	0.00117987
TMEM234	1p35.2	-0.23655	2.90885e-05	0.00118168
ATP5F1E	20q13.32	-0.236485	2.92419e-05	0.00118459
MBLAC1	7q22.1	-0.236469	2.92782e-05	0.00118459
CTU2	16q24.3	-0.236403	2.94335e-05	0.00118847
ARMC9	2q37.1	-0.236354	2.95481e-05	0.00118975
UCHL1	4p13	-0.236339	2.95837e-05	0.00118975
ERMP1	9p24.1	0.236202	2.99102e-05	0.00120048
LINS1	15q26.3	0.235923	3.05838e-05	0.00122495
CMTM3	16q22.1	-0.235899	3.06421e-05	0.00122495
CD83	6p23	-0.235567	3.14632e-05	0.00125527
UHMK1	1q23.3	0.235497	3.16411e-05	0.00125987
RNASEL	1q25.3	0.235193	3.2415e-05	0.00128813
MAST4	5q12.3	0.235065	3.2747e-05	0.00129875
ADRM1	20q13.33	-0.23502	3.28639e-05	0.00129877
GTF3C6	6q21	-0.234999	3.29175e-05	0.00129877
DPP8	15q22.31	0.23499	3.29416e-05	0.00129877
SRRM2	16p13.3	0.234596	3.39898e-05	0.00133348
COPS9	2q37.3	-0.234587	3.40124e-05	0.00133348
RBM42	19q13.12	-0.234584	3.40215e-05	0.00133348
ZBTB37	1q25.1	0.234518	3.41994e-05	0.00133784
CDK13	7p14.1	0.234442	3.44078e-05	0.00134338
MIF	22q11.23	-0.234194	3.50893e-05	0.00136153
IL6R	1q21.3	0.234192	3.50962e-05	0.00136153
MRPL37	1p32.3	-0.234182	3.5123e-05	0.00136153
TADA1	1q24.1	0.234174	3.5144e-05	0.00136153
WNT6	2q35	-0.234021	3.55728e-05	0.00137548
POLE3	9q32	0.233937	3.58108e-05	0.00138202
EMC8	16q24.1	-0.233766	3.62991e-05	0.00139818
POMGNT2	3p22.1	-0.23365	3.66334e-05	0.00140735
C1ORF220	1q25.2	0.233634	3.66776e-05	0.00140735
RNPC3	1p21.1	0.233606	3.67597e-05	0.00140781
ACTG1P4	1p21.1	0.233521	3.70068e-05	0.00141458
LGALS1	22q13.1	-0.233444	3.72319e-05	0.00142048
GPN2	1p36.11	-0.23336	3.74813e-05	0.00142728
RBM4	11q13.2	-0.233294	3.76775e-05	0.00143126
HMBOX1	8p21.1-p12	0.233276	3.77286e-05	0.00143126
TNFRSF10B	8p21.3	0.233236	3.78484e-05	0.0014331
PPIG	2q31.1	0.233075	3.83326e-05	0.0014487
C2CD4D-AS1	1q21.3	0.23275	3.9325e-05	0.00148341
KANK1	9p24.3	0.232334	4.06347e-05	0.00152778
FAM126B	2q33.1	0.232328	4.06534e-05	0.00152778
PEPD	19q13.11	-0.232248	4.09096e-05	0.00153453
XIST	Xq13.2	0.232091	4.14157e-05	0.00154941
UBE2Q2P2	15q25.2	0.232077	4.14606e-05	0.00154941
TP53I13	17q11.2	-0.231906	4.20228e-05	0.0015675
EBNA1BP2	1p34.2	-0.231845	4.2222e-05	0.001572
SLC12A6	15q14	0.231804	4.2358e-05	0.00157415
SLCO1B1	12p12.1	0.23169	4.27385e-05	0.00158535
SCYL3	1q24.2	0.231632	4.29345e-05	0.00158968
WIPF2	17q21.2	0.231543	4.32339e-05	0.00159782
FOXN2	2p16.3	0.231504	4.33674e-05	0.00159981
CD320	19p13.2	-0.231388	4.376e-05	0.00161097
CCND3	6p21.1	-0.231344	4.39107e-05	0.00161097
MEN1	11q13.1	-0.231344	4.39107e-05	0.00161097
C1ORF159	1p36.33	-0.231271	4.41645e-05	0.00161599
EPPK1	8q24.3	0.231238	4.42789e-05	0.00161599
SLC22A20P	11q13.1	0.231235	4.42891e-05	0.00161599
CHMP6	17q25.3	-0.231125	4.46705e-05	0.00162695
DPP3	11q13.2	-0.231076	4.48404e-05	0.00163018
CCM2	7p13	-0.231028	4.50109e-05	0.00163341
NFKBIE	6p21.1	-0.230932	4.53492e-05	0.00163902
IPMK	10q21.1	0.230895	4.54799e-05	0.00163902
DARS2	1q25.1	0.230883	4.55245e-05	0.00163902
MYCBP2	13q22.3	0.230875	4.55498e-05	0.00163902
WHAMM	15q25.2	0.230869	4.55737e-05	0.00163902
CTNND1	11q12.1	0.230792	4.58485e-05	0.00164595
PACC1	1q32.3	-0.230726	4.60843e-05	0.00165146
LOC100132215	2p15	0.230683	4.6238e-05	0.00165402
ZNF428	19q13.31	-0.230633	4.64212e-05	0.00165762
CLIC1	6p21.33	-0.230606	4.65167e-05	0.00165808
WRN	8p12	0.230447	4.70957e-05	0.00167574
NT5C1B	2p24.2	0.23025	4.7824e-05	0.00169864
GABARAPL2	16q23.1	-0.230161	4.81563e-05	0.00170742
NELFE	6p21.33	-0.230068	4.8509e-05	0.00171689
CPEB3	10q23.32	0.229956	4.89326e-05	0.00172418
DGCR6L	22q11.21	-0.229949	4.89565e-05	0.00172418
DNAJB11	3q27.3	-0.229927	4.90426e-05	0.00172418
AKAP13	15q25.3	0.229923	4.90586e-05	0.00172418
SLC25A1	22q11.21	-0.229833	4.94031e-05	0.00173325
OSBPL3	7p15.3	0.229796	4.95447e-05	0.00173519
BICD2	9q22.31	0.229706	4.98908e-05	0.00174327
GPS1	17q25.3	-0.229691	4.99492e-05	0.00174327
UCHL5	1q31.2	0.22966	5.00712e-05	0.00174449
FDX2	19p13.2	-0.229454	5.08766e-05	0.00176948
CEP95	17q23.3	0.22934	5.13296e-05	0.00178215
PPIE	1p34.2	-0.229269	5.16103e-05	0.0017888
PUSL1	1p36.33	-0.22915	5.20898e-05	0.00180231
TAF11	6p21.31	-0.229077	5.23837e-05	0.00180936
PKIG	20q13.12	-0.22896	5.28606e-05	0.00182104
NOS1AP	1q23.3	0.22895	5.29035e-05	0.00182104
SLC9A3	5p15.33	0.228833	5.33813e-05	0.00183434
KRIT1	7q21.2	0.228802	5.3512e-05	0.00183569
KIF21A	12q12	0.22876	5.36839e-05	0.00183656
UBE2S	19q13.42	-0.228752	5.37204e-05	0.00183656
CKAP4	12q23.3	-0.228684	5.40012e-05	0.00184162
LINC00894	Xq28	0.228672	5.40519e-05	0.00184162
SCAF11	12q12	0.228566	5.44963e-05	0.00185361
DDX58	9p21.1	0.228384	5.52684e-05	0.0018767
ARPC4	3p25.3	-0.228225	5.59514e-05	0.00189668
TMEM38B	9q31.2	0.228183	5.61324e-05	0.0018996
ATP2A2	12q24.11	0.228107	5.64633e-05	0.00190586
SDF2	17q11.2	-0.228097	5.65071e-05	0.00190586
RUSC1-AS1	1q22	0.22802	5.68438e-05	0.00191085
ARL2	11q13.1	-0.228019	5.68456e-05	0.00191085
CEP131	17q25.3	-0.227943	5.71786e-05	0.00191883
FBXW9	19p13.13	-0.227612	5.86538e-05	0.00196505
SEC16A	9q34.3	0.227578	5.88109e-05	0.00196596
EBLN2	3p13	0.227563	5.8877e-05	0.00196596
PPP2R2A	8p21.2	0.227455	5.93665e-05	0.00197902
XXYLT1	3q29	-0.227298	6.00894e-05	0.00199979
ALYREF	17q25.3	-0.227275	6.01958e-05	0.00200001
RNF20	9q31.1	0.227213	6.0483e-05	0.00200624
CSNK1G1	15q22.31	0.227161	6.07247e-05	0.00201093
MYO9A	15q23	0.227136	6.084e-05	0.00201143
LRRC8A	9q34.11	0.227051	6.12403e-05	0.00202133
RAB32	6q24.3	-0.226951	6.17124e-05	0.00203206
OTX1	2p15	0.226939	6.1768e-05	0.00203206
DIS3	13q21.33	0.226745	6.26911e-05	0.00205906
KIF20B	10q23.31	0.226637	6.32143e-05	0.00207272
SKIV2L	6p21.33	-0.226616	6.33137e-05	0.00207272
RNF111	15q22.1-q22.2	0.226563	6.35722e-05	0.0020778
CES2	16q22.1	0.226469	6.40325e-05	0.00208685
BRD3	9q34.2	0.226464	6.40571e-05	0.00208685
GPR75	2p16.2	0.226358	6.45785e-05	0.00210042
GRHPR	9p13.2	0.226116	6.57871e-05	0.00213385
MTFP1	22q12.2	-0.226109	6.58187e-05	0.00213385
MRPL28	16p13.3	-0.225986	6.64429e-05	0.0021463
TOMM34	20q13.12	-0.225972	6.65131e-05	0.0021463
NCLN	19p13.3	-0.22597	6.65238e-05	0.0021463
OTUD4	4q31.21	0.225896	6.69014e-05	0.00215502
DAD1	14q11.2	-0.225818	6.72982e-05	0.00216433
STIM1	11p15.4	0.225547	6.87058e-05	0.00220606
PRRG4	11p13	0.225471	6.91017e-05	0.00221523
NMRK1	9q21.13	0.225155	7.0788e-05	0.00226567
FOCAD	9p21.3	0.225132	7.09099e-05	0.00226596
SCAPER	15q24.3	0.225056	7.13223e-05	0.00227291
ZZEF1	17p13.2	0.22505	7.13541e-05	0.00227291
ATF7	12q13.13	0.224898	7.2186e-05	0.00229577
UBQLN1	9q21.32|9q21.2-q21.3	0.224833	7.25407e-05	0.0023034
PRAF2	Xp11.23	-0.224786	7.2802e-05	0.00230804
ZDBF2	2q33.3	0.22472	7.31665e-05	0.00231594
CUEDC2	10q24.32	-0.224657	7.35187e-05	0.00232342
TSNAXIP1	16q22.1	-0.224382	7.50699e-05	0.00236667
PRKCSH	19p13.2	-0.224352	7.52417e-05	0.00236667
AKAP10	17p11.2	0.224347	7.52656e-05	0.00236667
NUTF2	16q22.1	-0.224331	7.53589e-05	0.00236667
SLC39A13	11p11.2	-0.224306	7.55002e-05	0.0023674
HYAL1	3p21.31	0.224072	7.68538e-05	0.00240609
OGFOD3	17q25.3	-0.224011	7.72055e-05	0.00241333
BABAM1	19p13.11	-0.223848	7.81644e-05	0.00243951
MAK16	8p12	0.223619	7.95291e-05	0.00247824
GPATCH3	1p36.11	-0.223573	7.98064e-05	0.00248303
RBM18	9q33.2	0.223369	8.10478e-05	0.00251775
ETAA1	2p14	0.223276	8.1616e-05	0.00253148
ANKRD20A20P	9q13	0.223226	8.19256e-05	0.00253717
EIF3I	1p35.2	-0.223052	8.30121e-05	0.00256685
JRKL	11q21	0.223018	8.32221e-05	0.00256938
ANKRD13A	12q24.11	0.222974	8.34983e-05	0.00257033
NOL7	6p23	-0.222972	8.35089e-05	0.00257033
TADA3	3p25.3	-0.22291	8.39024e-05	0.00257849
ORMDL3	17q21.1	-0.222814	8.45107e-05	0.00259321
SMS	Xp22.11	-0.222737	8.49997e-05	0.00260424
CREBZF	11q14.1	0.222621	8.57478e-05	0.00262118
ZBTB21	21q22.3	0.222606	8.58451e-05	0.00262118
RPS19BP1	22q13.1	-0.222575	8.60455e-05	0.00262118
UBAC1	9q34.3	0.22257	8.60753e-05	0.00262118
FBXO38	5q32	0.222451	8.68541e-05	0.00263897
H1FX-AS1	3q21.3	-0.22244	8.69223e-05	0.00263897
SLC9A8	20q13.13	0.222267	8.80624e-05	0.00266669
LCOR	10q24.1	0.222261	8.81012e-05	0.00266669
EPC1	10p11.22	0.222167	8.87269e-05	0.00268158
COMMD1	2p15	-0.221892	9.05721e-05	0.00273324
FBXO28	1q42.11	0.221856	9.08199e-05	0.0027366
TSSK4	14q12	0.221827	9.10134e-05	0.00273832
MSX1	4p16.2	-0.221801	9.11943e-05	0.00273965
FLOT1	6p21.33	-0.22178	9.13404e-05	0.00273994
URB1	21q22.11	0.221745	9.15758e-05	0.0027429
SLC43A2	17p13.3	-0.221687	9.19732e-05	0.0027507
GAS8-AS1	16q24.3	0.221543	9.29749e-05	0.00277652
TCERG1	5q32	0.221413	9.38818e-05	0.00279944
SMIM20	4p15.2	-0.221388	9.40585e-05	0.00280054
ZBTB34	9q33.3	0.221244	9.50746e-05	0.00282656
LOC100272216		0.221225	9.52141e-05	0.00282656
SLC2A6	9q34.2	-0.221184	9.55042e-05	0.00283099
RC3H1	1q25.1	0.221098	9.6122e-05	0.0028451
UNC119	17q11.2	-0.221013	9.67344e-05	0.00285847
TRIM14	9q22.33	0.220984	9.69404e-05	0.00285847
CCDC102A	16q21	-0.220976	9.70011e-05	0.00285847
ZC3H4	19q13.32	0.220724	9.88389e-05	0.00290678
PDPK1	16p13.3	0.220712	9.89302e-05	0.00290678
HEATR5B	2p22.2	0.220477	0.000100681	0.00295374
RNF169	11q13.4	0.220458	0.000100823	0.00295374
MTPAP	10p11.23	0.220378	0.000101426	0.00296707
PKN2	1p22.2	0.220253	0.000102376	0.00299035
IREB2	15q25.1	0.220234	0.000102519	0.00299035
TMSB4XP8	4q22.1	-0.220155	0.000103122	0.00300355
TMEM132A	11q12.2	-0.220097	0.000103569	0.00300651
ANKRD36BP1	1q24.2	0.220085	0.00010366	0.00300651
FCGRT	19q13.33	-0.220083	0.000103673	0.00300651
MPZL3	11q23.3	0.220033	0.000104062	0.00301345
AHSA1	14q24.3	-0.22	0.000104314	0.00301639
GLT8D1	3p21.1	-0.219855	0.00010545	0.00304485
PCBD2	5q31.1	0.219799	0.000105891	0.00305318
CHCHD6	3q21.3	-0.219773	0.000106092	0.00305459
SLCO1B7	12p12.2	0.219748	0.00010629	0.00305592
RBP1	3q23	-0.21966	0.000106983	0.00307144
ZBTB7A	19p13.3	0.219567	0.000107727	0.00308838
DNAJC4	11q13.1	-0.21932	0.00010972	0.00313733
ABO	9q34.2	0.219317	0.000109747	0.00313733
DENND2C	1p13.2	0.219228	0.000110471	0.00314057
SLC39A3	19p13.3	-0.219223	0.000110512	0.00314057
SLC16A6	17q24.2	0.219214	0.000110588	0.00314057
HNRNPK	9q21.32	0.21921	0.000110619	0.00314057
SRCAP	16p11.2	0.219207	0.000110643	0.00314057
NCOA4	10q11.22	0.219157	0.000111055	0.00314783
HSBP1	16q23.3	-0.219122	0.000111342	0.00315149
CCDC24	1p34.1	-0.219069	0.000111781	0.0031582
RYR2	1q43	0.219055	0.000111893	0.0031582
SON	21q22.11	0.219	0.000112354	0.00316675
KIF1A	2q37.3	-0.218954	0.000112733	0.00316904
RPP21	6p22.1	-0.218941	0.000112839	0.00316904
ANO10	3p22.1-p21.33	-0.218933	0.000112909	0.00316904
LRPAP1	4p16.3	-0.218872	0.000113421	0.00317897
BRIP1	17q23.2	0.218741	0.000114526	0.00320238
SUPT3H	6p21.1	-0.218735	0.000114576	0.00320238
FASTKD3	5p15.31	0.218641	0.000115373	0.00322018
MYO19	17q12	0.218587	0.000115831	0.00322304
P4HA1	10q22.1	-0.218576	0.000115928	0.00322304
CHD9	16q12.2	0.21856	0.000116064	0.00322304
ATAT1	6p21.33	-0.218554	0.000116118	0.00322304
GON4L	1q22	0.218464	0.000116893	0.00324006
CCS	11q13.2	-0.218388	0.000117549	0.00325375
SASS6	1p21.2	0.218325	0.000118099	0.00326446
MIGA2	9q34.11	0.218255	0.000118706	0.00327674
TAF5L	1q42.13	0.218187	0.000119305	0.00328875
AKR1C6P	10p15.1	0.218164	0.000119508	0.00328984
STMN1	1p36.11	-0.218066	0.000120378	0.00330924
CAP2	6p22.3	-0.218025	0.000120743	0.00331472
LOC730668	22q13.31	0.217903	0.000121828	0.00333996
CHPF	2q35	-0.217861	0.000122204	0.00334569
PTPDC1	9q22.32	0.217467	0.000125799	0.0034343
GGNBP2	17q12	0.217465	0.000125822	0.0034343
SCAMP2	15q24.1	0.21745	0.000125954	0.0034343
KMT2D	12q13.12	0.217375	0.00012665	0.00344858
FBXL19-AS1	16p11.2	0.217225	0.000128056	0.00348215
VOPP1	7p11.2	-0.217207	0.000128229	0.00348215
RNF166	16q24.2-q24.3	-0.217005	0.000130143	0.00352101
DDOST	1p36.12	-0.217003	0.000130159	0.00352101
IQGAP1	15q26.1	0.217	0.000130187	0.00352101
YIF1B	19q13.2	-0.216934	0.000130816	0.00353327
PDCL	9q33.2	0.216888	0.000131259	0.00353628
SMIM12	1p34.3	-0.216873	0.000131404	0.00353628
FAF2	5q35.2	0.216868	0.000131456	0.00353628
GPX7	1p32.3	-0.216835	0.000131771	0.00354001
TACC2	10q26.13	0.216766	0.000132444	0.00354957
ST3GAL2	16q22.1	-0.216762	0.000132481	0.00354957
ZNF687	1q21.3	0.216718	0.000132904	0.00355617
PCDHGB8P	5q31.3	0.216625	0.000133818	0.00357585
PRDX4	Xp22.11	-0.216445	0.000135592	0.00361395
SAC3D1	11q13.1	-0.216443	0.000135604	0.00361395
DNHD1	11p15.4	0.216365	0.000136383	0.00362989
PDCL3	2q11.2	-0.216344	0.000136597	0.00363075
ZDHHC8P1	22q11.23	-0.216256	0.000137473	0.00364922
ZNF580	19q13.42	-0.216205	0.000137988	0.00365804
HECTD4	12q24.13	0.215947	0.000140612	0.00372075
FNTA	8p11.21	0.215936	0.000140724	0.00372075
USP16	21q21.3	0.215884	0.000141263	0.00372723
CEP72	5p15.33	0.215876	0.000141341	0.00372723
SEC22C	3p22.1	-0.215804	0.000142085	0.00374001
NUDT3	6p21.31	-0.215794	0.000142198	0.00374001
NFKBIL1	6p21.33	-0.21571	0.000143065	0.00375789
NAGPA	16p13.3	-0.215689	0.000143284	0.00375871
CHST14	15q15.1	-0.21561	0.000144113	0.00377553
PIGU	20q11.22	-0.215537	0.00014488	0.00379068
QPCT	2p22.2	-0.21546	0.0001457	0.00380717
FAM83G	17p11.2	0.215334	0.000147043	0.00383323
NBPF10	1q21.1	0.21533	0.000147079	0.00383323
SUMO1	2q33.1	-0.215306	0.000147335	0.00383491
CHD2	15q26.1	0.215204	0.000148439	0.00385865
LOC652276	16p13.3	0.214958	0.000151116	0.00391892
DENND1B	1q31.3	0.214955	0.000151148	0.00391892
WAC	10p12.1|10p12.1-p11.2	0.214842	0.00015239	0.00394602
CFDP1	16q23.1	-0.21478	0.000153087	0.00395895
PUM3	9p24.2	0.214723	0.000153721	0.00397024
KIF14	1q32.1	0.214683	0.000154161	0.00397648
MAP4K2	11q13.1	-0.214625	0.000154818	0.00398831
NPAT	11q22.3	0.214552	0.000155639	0.0040043
MCTP2	15q26.2	0.214525	0.000155942	0.00400696
ATAD3A	1p36.33	-0.21445	0.000156787	0.00402352
MOB3B	9p21.2	0.214399	0.000157368	0.00403121
PPP2CB	8p12	0.214373	0.000157665	0.00403121
DCST2	1q21.3	0.214371	0.000157689	0.00403121
HMGA1	6p21.31	-0.214338	0.000158072	0.00403586
ARFGAP1	20q13.33	-0.21431	0.000158384	0.00403869
NBDY	Xp11.21	-0.214207	0.000159575	0.0040639
C1RL-AS1	12p13.31	0.214188	0.000159793	0.00406429
LIN54	4q21.22	0.214142	0.000160332	0.00407283
GNAI2	3p21.31	-0.21398	0.000162218	0.00411555
TMEM143	19q13.33	0.21396	0.000162449	0.00411621
EML2	19q13.32	0.213904	0.00016311	0.00412452
MYL9	20q11.23	-0.213894	0.000163234	0.00412452
PRPF19	11q12.2	-0.213869	0.000163521	0.00412452
ZNF655	7q22.1	0.213863	0.0001636	0.00412452
MBD3	19p13.3	-0.21358	0.00016697	0.00420111
NEAT1	11q13.1	0.213573	0.000167056	0.00420111
LYPLA2P1	6p21.32	-0.213478	0.000168212	0.00422487
HYI	1p34.2	-0.213459	0.000168446	0.00422546
TMEM205	19p13.2	-0.213371	0.000169518	0.00424705
ATAD2B	2p24.1-p23.3	0.213319	0.000170154	0.00425767
MSMP	9p13.3	0.213289	0.000170519	0.0042615
CMTM7	3p22.3	-0.213253	0.000170968	0.00426739
LOC100272217	9q34.11	0.213174	0.000171941	0.00427882
FAM160B2	8p21.3	0.213154	0.00017219	0.00427882
SDF4	1p36.33	-0.213149	0.000172247	0.00427882
MLANA	9p24.1	0.213138	0.000172381	0.00427882
ZNRD2	11q13.1	-0.213129	0.000172492	0.00427882
BAZ2A	12q13.3	0.21311	0.000172731	0.00427947
RUFY2	10q21.3	0.213069	0.000173248	0.00428018
FBXL15	10q24.32	-0.213068	0.000173253	0.00428018
DOLPP1	9q34.11	0.213057	0.0001734	0.00428018
RAB3GAP2	1q41	0.213023	0.000173819	0.00428525
RCN1	11p13	-0.21298	0.000174354	0.00429317
LRRK1	15q26.3	0.212919	0.000175129	0.00430696
MIIP	1p36.22	-0.212897	0.000175409	0.00430829
TAS2R14	12p13.2	0.212872	0.000175714	0.00430829
KNL1	15q15.1	0.212863	0.000175827	0.00430829
TDRD7	9q22.33	0.21278	0.000176884	0.00432892
LGALS12	11q12.3	-0.212648	0.000178576	0.004365
GTPBP10	7q21.13	0.212584	0.0001794	0.00437751
UXS1	2q12.2	-0.212574	0.000179524	0.00437751
CRELD1	3p25.3	-0.212468	0.000180896	0.00439865
SYNE2	14q23.2	0.212461	0.000180983	0.00439865
DIAPH1	5q31.3	0.212456	0.000181049	0.00439865
C4ORF48	4p16.3	-0.212408	0.00018168	0.00440866
NHLRC4	16p13.3	-0.212348	0.000182469	0.00441846
NIPAL2	8q22.2	0.212343	0.000182525	0.00441846
ERCC6L2	9q22.32	0.212312	0.000182931	0.00442297
BEX3	Xq22.2	-0.212217	0.000184183	0.00444494
USP25	21q21.1	0.21221	0.000184283	0.00444494
PPP1R3E	14q11.2	0.212147	0.00018511	0.00445825
MAP3K21	1q42.2	0.212135	0.000185279	0.00445825
SYNJ1	21q22.11	0.211924	0.00018809	0.00451268
RAD51AP2	2p24.2	0.211911	0.000188268	0.00451268
PDF	16q22.1	-0.211909	0.000188299	0.00451268
ZBTB44	11q24.3	0.211899	0.00018844	0.00451268
CCNT2	2q21.3	0.211828	0.000189398	0.00452545
TRMT13	1p21.2	0.211804	0.000189717	0.00452545
MYL6B	12q13.2	-0.211796	0.00018983	0.00452545
COL18A1	21q22.3	-0.211793	0.000189876	0.00452545
NUDT2	9p13.3	0.211738	0.000190618	0.00453304
MTUS1	8p22	0.211736	0.000190646	0.00453304
SNAPC5	15q22.31	0.211615	0.000192305	0.00456229
DDX42	17q23.3	0.211597	0.000192553	0.00456229
SELENOH	11q12.1	-0.211597	0.000192558	0.00456229
SPDYE5	7q11.23	0.211496	0.00019395	0.00458985
SRSF5	14q24.1	0.211444	0.000194675	0.00460158
NT5C3B	17q21.2	-0.211398	0.000195306	0.00460935
MOSPD3	7q22.1	-0.211387	0.000195463	0.00460935
IKZF2	2q34	0.211347	0.000196026	0.00461719
C17ORF78	17q12	0.211255	0.000197323	0.00464229
AHCTF1	1q44	0.211236	0.00019758	0.00464291
LCT	2q21.3	0.211167	0.000198566	0.0046606
ARAP2	4p14	0.211127	0.000199128	0.00466835
ACVR1C	2q24.1	0.211068	0.000199976	0.00468274
CD151	11p15.5	-0.211007	0.000200838	0.00469745
RNF141	11p15.4|11p15	0.210782	0.000204091	0.00476542
MTBP	8q24.12	0.210773	0.000204219	0.00476542
KDM1A	1p36.12	-0.210742	0.00020467	0.00477041
TRIM78P	11p15	0.210623	0.000206416	0.00480552
RTL8C	Xq26.3	-0.210583	0.00020701	0.00481376
RPN1	3q21.3	-0.210392	0.00020983	0.00487216
SMG1	16p12.3	0.210378	0.000210043	0.00487216
ZFAND5	9q21.13	0.210364	0.00021025	0.00487216
CCNQ	Xq28	-0.210342	0.000210588	0.00487419
ANKRD36B	2q11.2	0.210315	0.000210995	0.00487419
ALDOB	9q31.1	0.21031	0.000211066	0.00487419
POLR2E	19p13.3	-0.210275	0.000211594	0.00488077
TPPP	5p15.33	0.210251	0.000211953	0.00488344
MTERF1	7q21.2	0.210211	0.000212554	0.00489166
OAS3	12q24.13	0.210139	0.000213651	0.00491128
PTX3	3q25.32	-0.210087	0.000214431	0.00491919
C22ORF46	22q13.2	0.210084	0.000214485	0.00491919
BCAS4	20q13.13	-0.210036	0.00021522	0.00493042
CARD14	17q25.3	0.209954	0.000216466	0.00495329
BEND3P3	10q22.3	0.209872	0.000217738	0.00497673
ZNF12	7p22.1	0.209829	0.000218398	0.00498614
DNAH1	3p21.1	0.209794	0.000218951	0.00499307
HNRNPU-AS1	1q44	0.20976	0.000219478	0.00499942
PRKAA1	5p13.1	0.209691	0.00022055	0.00501304
RND2	17q21.31	-0.209689	0.000220576	0.00501304
WASHC4	12q23.3	0.209598	0.000222015	0.00504004
SFT2D1	6q27	-0.209569	0.000222457	0.00504437
MRE11	11q21	0.209474	0.00022396	0.00507273
LPAR5	12p13.31	0.209391	0.000225286	0.00509082
STAG3L1	7q11.23	0.209379	0.000225487	0.00509082
BRK1	3p25.3	-0.209376	0.00022552	0.00509082
PFN2	3q25.1	-0.209299	0.00022676	0.00510915
NT5DC2	3p21.1	-0.209294	0.000226841	0.00510915
SMC6	2p24.2	0.209208	0.000228224	0.00513452
HIST4H4	12p12.3	0.209174	0.000228772	0.00514109
MASP2	1p36.22	0.209113	0.000229764	0.00515737
RFNG	17q25.3	-0.209087	0.000230192	0.00515737
CNOT4	7q33	0.209082	0.000230267	0.00515737
MASTL	10p12.1	0.208923	0.000232872	0.0052099
KIAA1671	22q11.23	0.208686	0.000236796	0.00529179
TOMM6	6p21.1	-0.208642	0.000237532	0.00530233
NUDT22	11q13.1	-0.208606	0.000238144	0.00531007
LMBRD2	5p13.2	0.208563	0.000238855	0.00532003
AS3MT	10q24.32	-0.208514	0.000239682	0.0053293
HMGN2	1p36.11	-0.208507	0.000239802	0.0053293
LOC100190986	16p12.2	0.208371	0.000242122	0.00537489
GCAT	22q13.1	-0.208306	0.000243232	0.00538888
ATAD5	17q11.2	0.208303	0.000243289	0.00538888
LAMP1	13q34	-0.208196	0.000245119	0.00542342
CIT	12q24.23	0.208172	0.000245538	0.00542546
PSMB1	6q27	-0.20813	0.000246271	0.00542546
EMC9	14q12	-0.208129	0.000246285	0.00542546
XKR8	1p35.3	-0.208128	0.000246292	0.00542546
PPP4R3B	2p16.1	0.208094	0.000246888	0.00543263
PER2	2q37.3	0.208017	0.000248231	0.0054523
WFS1	4p16.1	-0.208012	0.000248326	0.0054523
TMEM231	16q23.1	-0.207995	0.000248611	0.00545261
IFNA13	9p21.3	0.207978	0.000248916	0.00545333
ZNF791	19p13.13	0.207882	0.000250597	0.00548416
PARP6	15q23	0.207841	0.000251328	0.00549417
RELCH	18q21.33	0.207805	0.000251958	0.00550195
NPHP1	2q13	-0.207734	0.000253214	0.00552337
CEP89	19q13.11	-0.207681	0.000254155	0.00553786
DNMBP	10q24.2	0.207618	0.000255293	0.00555665
TP53RK	20q13.12	-0.207571	0.000256128	0.00556707
ISCA2	14q24.3	-0.20756	0.000256327	0.00556707
EMC10	19q13.33	-0.207348	0.000260179	0.00564463
HP1BP3	1p36.12	0.207303	0.000260998	0.00565628
LRRN4	20p12.3	-0.207217	0.000262576	0.00568433
RRAGA	9p22.1	0.207195	0.000262975	0.00568683
RPUSD3	3p25.3	-0.207177	0.000263311	0.00568796
MORN4	10q24.2	-0.207135	0.000264089	0.00569864
PLOD3	7q22.1	-0.206997	0.000266658	0.00574778
HSP90B1	12q23.3	-0.206982	0.000266939	0.00574778
FBXO34	14q22.3	0.206889	0.000268674	0.00577894
SEPTIN4	17q22	-0.20674	0.000271499	0.00582781
WDR54	2p13.1	-0.206729	0.000271706	0.00582781
MMD	17q22	-0.206723	0.000271818	0.00582781
LINC01126	2p21	0.206677	0.000272693	0.00584033
PLPBP	8p11.23	0.20665	0.000273206	0.00584509
ZSCAN29	15q15.3	0.20658	0.000274545	0.00586748
HSP90AB1	6p21.1	-0.206564	0.00027485	0.00586776
SH2D1B	1q23.3	0.206363	0.000278746	0.00594461
SEPTIN7P2	7p12.3	0.206314	0.000279692	0.00595416
HPS5	11p15.1	0.206307	0.000279839	0.00595416
GLRX5	14q32.13	-0.206294	0.000280084	0.00595416
DYNLRB1	20q11.22	-0.206199	0.000281948	0.00598745
SPTBN2	11q13.2	0.206167	0.000282583	0.00599459
FAM102A	9q34.11	0.20597	0.000286479	0.00607008
BIRC6	2p22.3	0.205957	0.000286747	0.00607008
TRIM32	9q33.1	0.205902	0.000287853	0.00608708
GOLGA6L5P	15q25.2	0.205879	0.00028831	0.00609033
ADAM20	14q24.2	0.205849	0.000288912	0.00609662
MAP1S	19p13.11	-0.205783	0.000290231	0.00611213
SMIM29	6p21.31	-0.205782	0.000290256	0.00611213
GABPB2	1q21.3	0.205757	0.000290773	0.00611659
POC1A	3p21.2	-0.205735	0.000291214	0.00611945
FKBPL	6p21.32	-0.205491	0.000296202	0.00621777
NCBP1	9q22.33	0.205424	0.000297576	0.00623358
RRP9	3p21.2	-0.205424	0.000297576	0.00623358
BAZ1A	14q13.1-q13.2	0.205309	0.000299967	0.00627711
RNF181	2p11.2	-0.205279	0.000300588	0.00628353
EIF3G	19p13.2	-0.205254	0.000301113	0.00628796
P2RY1	3q25.2	0.20517	0.000302876	0.00631504
KIAA1958	9q32	0.205153	0.000303239	0.00631504
TTF2	1p13.1	0.205147	0.000303354	0.00631504
ERLIN2	8p11.23	0.205063	0.000305131	0.0063336
PTGES2-AS1	9q34.11	0.205061	0.000305173	0.0063336
BAX	19q13.33	-0.205046	0.000305486	0.0063336
STK11	19p13.3	-0.205032	0.000305788	0.0063336
PGAM2	7p13	0.20503	0.000305823	0.0063336
GMPR	6p22.3	-0.204976	0.000306971	0.00635083
SNORA71E	20q11.23	0.204948	0.000307579	0.00635684
TOR1AIP2	1q25.2	0.204812	0.000310494	0.00640613
PKN1	19p13.12	-0.204807	0.000310602	0.00640613
GANC	15q15.1	0.204586	0.000315396	0.00649833
RAPGEF5	7p15.3	0.20457	0.000315735	0.00649863
TRNAU1AP	1p35.3	-0.204529	0.000316624	0.00651025
IL1RL1	2q12.1	0.204473	0.000317862	0.00652903
TRIM27	6p22.1	-0.204442	0.000318556	0.00653659
PTK2B	8p21.2	0.204399	0.000319499	0.00654749
FAM135A	6q13	0.204388	0.00031974	0.00654749
UQCC2	6p21.31	-0.204346	0.000320667	0.00655978
RABEP2	16p11.2	-0.20422	0.000323474	0.00661046
CYP27A1	2q35	-0.204132	0.000325436	0.00663565
PHGDH	1p12	-0.204127	0.000325549	0.00663565
AKR7A2	1p36.13	-0.204118	0.000325756	0.00663565
ASXL2	2p23.3	0.204095	0.000326284	0.00663565
ANKFY1	17p13.2	0.204091	0.00032636	0.00663565
NFATC2IP	16p11.2	0.203968	0.000329146	0.00668186
COTL1	16q24.1	-0.203962	0.000329298	0.00668186
PAN2	12q13.3	0.20382	0.000332521	0.00673912
ARHGEF12	11q23.3	0.203797	0.00033305	0.00673912
ACTR1A	10q24.32	-0.203788	0.000333261	0.00673912
C20ORF27	20p13	-0.203779	0.000333463	0.00673912
GPATCH8	17q21.31	0.20376	0.000333916	0.00674148
ATM	11q22.3	0.203698	0.000335346	0.00676355
SLC28A3	9q21.32-q21.33	0.203635	0.0003368	0.00678606
LDLRAD2	1p36.12	-0.203585	0.00033795	0.00679872
MFRP	11q23.3	-0.203579	0.000338106	0.00679872
ID3	1p36.12	-0.203515	0.000339592	0.00682176
RASA2	3q23	0.203472	0.000340613	0.00683541
ASIC3	7q36.1	0.20344	0.000341359	0.00684344
RNF215	22q12.2	-0.203425	0.000341695	0.00684344
ETV3	1q23.1	0.203372	0.000342958	0.00686189
TBPL1	6q23.2	-0.203338	0.00034376	0.00687108
CYB5D1	17p13.1	0.203287	0.00034496	0.00688197
AHNAK2	14q32.33	0.203286	0.00034499	0.00688197
GLA	Xq22.1	-0.20326	0.000345617	0.00688763
CAMK2N2	3q27.1	-0.203154	0.000348135	0.00693092
NIPBL	5p13.2	0.203116	0.000349058	0.00694242
TPGS1	19p13.3	-0.203044	0.000350791	0.00696942
UBXN8	8p12	0.203026	0.000351215	0.00696942
RXRA	9q34.2	0.203016	0.000351458	0.00696942
BCL2L2	14q11.2	0.202975	0.00035244	0.006982
C5ORF51	5p13.1	0.202916	0.000353872	0.00700346
TRAPPC3	1p34.3	-0.202901	0.000354249	0.00700401
COL2A1	12q13.11	-0.202864	0.000355155	0.00701501
B3GALT6	1p36.33	-0.202811	0.000356446	0.00703173
LIMS2	2q14.3	-0.2028	0.000356702	0.00703173
CBWD3	9q21.11	0.202737	0.000358243	0.00705518
LARP6	15q23	-0.202704	0.000359068	0.00705919
DICER1	14q32.13	0.202701	0.000359151	0.00705919
SREBF2	22q13.2	0.202674	0.000359801	0.0070614
DDX59	1q32.1	0.202667	0.000359967	0.0070614
RPS6KB1	17q23.1	0.202649	0.000360432	0.00706363
TRAF6	11p12	0.202581	0.000362113	0.00708965
KCNE5	Xq23	-0.202504	0.000364022	0.00712008
RAD23B	9q31.2	0.202388	0.000366937	0.00717009
TOR1B	9q34.11	0.202364	0.000367537	0.00717484
BDP1	5q13.2	0.202329	0.000368424	0.00718516
CIZ1	9q34.11	0.202179	0.000372215	0.00725204
MYO18A	17q11.2	0.202164	0.000372599	0.00725249
PDXP	22q13.1	-0.202067	0.000375084	0.00729378
RTN3	11q13.1	-0.202019	0.000376322	0.00730103
CREBRF	5q35.1	0.202014	0.000376451	0.00730103
NIBAN2	9q34.11	0.20201	0.000376548	0.00730103
OTOP3	17q25.1	0.201843	0.000380855	0.00737742
TSR3	16p13.3	-0.201784	0.000382413	0.00740045
MPP2	17q21.31	-0.201647	0.000385989	0.00746246
SIK1	21q22.3	0.201624	0.000386614	0.00746315
C7ORF26	7p22.1	-0.201618	0.000386769	0.00746315
CAPZA1	1p13.2	0.201558	0.000388364	0.00748673
ING1	13q34	-0.201519	0.000389386	0.00749268
ARIH1	15q24.1	0.201518	0.000389419	0.00749268
TRPC4AP	20q11.22	-0.201381	0.000393073	0.00755575
ABHD18	4q28.2	0.201299	0.000395284	0.00758803
CITED1	Xq13.1	-0.20129	0.000395509	0.00758803
DNAJC27	2p23.3	0.201263	0.000396239	0.00759198
CARD6	5p13.1	0.201243	0.000396782	0.00759198
WDR18	19p13.3	-0.201241	0.00039685	0.00759198
GCSAML	1q44	0.201205	0.000397812	0.00760314
HSPA1B	6p21.33	-0.20118	0.000398484	0.00760735
CNOT7	8p22	0.201169	0.000398791	0.00760735
SNAPC3	9p22.3	0.201091	0.0004009	0.00764033
SIN3A	15q24.2	0.20107	0.000401495	0.00764441
HMG20A	15q24.3	0.201045	0.00040216	0.0076498
RANGRF	17p13.1	-0.200971	0.000404205	0.00768143
YIF1A	11q13.2	-0.200928	0.000405382	0.0076965
AKAP9	7q21.2	0.200896	0.00040626	0.00770589
FBXO4	5p13.1	0.200819	0.000408407	0.00773929
HAUS7	Xq28	-0.200795	0.00040907	0.00774386
ZNF395	8p21.1	0.200782	0.00040942	0.00774386
CBLL1	7q22.3	0.200567	0.000415464	0.00785078
PRR29	17q23.3	-0.200451	0.000418749	0.00790541
SLC10A7	4q31.22	0.200393	0.000420395	0.00791887
ANKRD20A8P	2q11.1	0.200388	0.000420528	0.00791887
PLEKHM1	17q21.31	0.200384	0.000420646	0.00791887
DDX6	11q23.3	0.200299	0.000423091	0.00795744
RPS4Y1	Yp11.2	-0.200216	0.00042548	0.00799488
ABHD17C	15q25.1	0.200165	0.000426929	0.00801459
XYLT2	17q21.33	-0.20012	0.000428239	0.00803169
PRMT1	19q13.33	-0.200092	0.000429054	0.00803946
MEX3A	1q22	-0.200064	0.000429864	0.00804712
TEX10	9q31.1	0.19999	0.000432022	0.00807999
TMSB15A	Xq22.1	-0.199931	0.000433774	0.0081052
ARHGAP11B	15q13.2	0.199841	0.000436427	0.0081351
HAUS2	15q15.2	0.19984	0.000436442	0.0081351
PRIM1	12q13.3	0.199835	0.000436591	0.0081351
ACD	16q22.1	-0.199796	0.000437755	0.00814923
SPACA4	19q13.33	0.199752	0.000439052	0.0081658
MFSD10	4p16.3	-0.199719	0.000440018	0.00817619
HIST2H4A	1q21.2	0.199659	0.000441829	0.00819591
C9ORF64	9q21.32	0.199652	0.000442029	0.00819591
C6ORF226	6p21.1	-0.199643	0.000442305	0.00819591
AHNAK	11q12.3	0.1996	0.000443596	0.00821226
MOCS1	6p21.2	-0.199577	0.000444288	0.00821433
RC3H2	9q33.2	0.199569	0.000444527	0.00821433
TDP2	6p22.3	-0.199547	0.000445181	0.00821886
HCFC2	12q23.3	0.199512	0.000446241	0.00823085
TTC17	11p12-p11.2	0.199484	0.000447062	0.0082367
MPP7	10p12.1	0.199474	0.000447379	0.0082367
PRRT3	3p25.3	-0.199327	0.000451855	0.00830974
NCOR1	17p12-p11.2	0.199316	0.000452174	0.00830974
CCDC25	8p21.1	0.199265	0.000453724	0.00833058
ADSL	22q13.1	-0.19923	0.000454815	0.00834299
CHCHD2	7p11.2	-0.199207	0.000455522	0.00834833
BIN3-IT1	8p21.3	0.19907	0.000459747	0.00841807
MARF1	16p13.11	0.199044	0.000460555	0.00842518
USP8	15q21.2	0.198993	0.000462144	0.00844654
DCTPP1	16p11.2	-0.198925	0.000464262	0.00847753
ALG2	9q22.33	0.198848	0.000466678	0.0085139
EXOC6B	2p13.2	0.198814	0.000467745	0.00852563
ABCA5	17q24.3	0.198796	0.000468313	0.00852823
ERICH1	8p23.3	0.198782	0.000468762	0.00852867
SLC25A40	7q21.12	0.198742	0.000470006	0.00853726
HEXA-AS1	15q23	0.19874	0.000470085	0.00853726
PFN1P2	1p11.2	0.198704	0.00047123	0.00855031
GJA4	1p34.3	-0.198664	0.000472477	0.00855843
NRM	6p21.33	-0.198663	0.00047253	0.00855843
LAMTOR4	7q22.1	-0.198502	0.000477656	0.00864347
OTOP2	17q25.1	0.198413	0.00048054	0.00867936
NCKAP5L	12q13.12	-0.198407	0.000480732	0.00867936
NTHL1	16p13.3	-0.198385	0.000481436	0.00867936
EP400	12q24.33	0.198383	0.000481504	0.00867936
PPARGC1B	5q32	0.198374	0.000481802	0.00867936
ABHD12	20p11.21	-0.198343	0.000482807	0.00868504
LIX1L	1q21.1	-0.198337	0.000482983	0.00868504
CRYBG3	3q11.2	0.198256	0.00048564	0.008725
FAM201A	9p13.1	0.198167	0.000488544	0.00876554
POMP	13q12.3	-0.19816	0.000488778	0.00876554
MSRB2	10p12.2	-0.198134	0.000489616	0.00876554
RMDN3	15q15.1	0.198133	0.000489644	0.00876554
STX5	11q12.3	-0.198102	0.000490664	0.00877597
TSEN34	19q13.42	-0.198076	0.000491547	0.00878394
SPATC1L	21q22.3	-0.198034	0.00049293	0.00880082
ELMSAN1	14q24.3	0.197989	0.000494414	0.00881188
TMEM184A	7p22.3	0.197988	0.000494428	0.00881188
RABAC1	19q13.2	-0.197961	0.000495345	0.0088204
USP3	15q22.31	0.197926	0.000496515	0.00883339
IL1RL2	2q12.1	0.197848	0.000499107	0.00887164
PURA	5q31.3	0.197833	0.00049962	0.00887289
TMEM115	3p21.31	-0.197742	0.000502671	0.0089192
REL	2p16.1	0.19772	0.000503391	0.00892408
PBXIP1	1q21.3	-0.197685	0.000504579	0.00893591
MRPL50	9q31.1	0.197655	0.000505599	0.00893591
SMURF1	7q22.1	0.197648	0.000505854	0.00893591
ZNF619	3p22.1	0.19763	0.000506464	0.00893591
ZNF518A	10q24.1	0.197611	0.000507104	0.00893591
COX16	14q24.2	-0.197609	0.000507161	0.00893591
PRDM12	9q34.12	0.197609	0.000507176	0.00893591
CKMT1A	15q15.3	0.197577	0.000508257	0.0089471
VGF	7q22.1	-0.197476	0.000511687	0.0089996
ABCB10	1q42.13	0.197436	0.00051308	0.00901006
STOML2	9p13.3	0.197433	0.00051318	0.00901006
EPHX2	8p21.2-p21.1	0.197413	0.000513871	0.0090143
TANC1	2q24.2	0.197357	0.000515774	0.00903979
DEPDC5	22q12.2-q12.3	0.197323	0.000516945	0.00905241
ABLIM1	10q25.3	0.197285	0.000518264	0.00905407
PARK7	1p36.23	-0.197277	0.000518554	0.00905407
RTCB	22q12.3	-0.19727	0.000518787	0.00905407
PIGQ	16p13.3	-0.197268	0.000518845	0.00905407
SLCO1B3	12p12.2	0.19723	0.000520178	0.00906945
RNF227	17p13.1	0.197137	0.000523439	0.00910868
STARD3	17q12	-0.197132	0.000523614	0.00910868
CEP83	12q22	0.197127	0.00052379	0.00910868
MYOF	10q23.33	0.197086	0.000525199	0.00912527
TEP1	14q11.2	0.19707	0.000525754	0.00912702
PALD1	10q22.1	-0.196978	0.000529016	0.0091757
TSSK3	1p35.1	0.196909	0.000531446	0.0092099
COA8	14q32.33	-0.196861	0.000533171	0.00922829
TMEM53	1p34.1	-0.196853	0.000533439	0.00922829
PRPF6	20q13.33	-0.19684	0.000533887	0.00922829
IFT43	14q24.3	-0.196822	0.000534543	0.00923168
LAGE3	Xq28	-0.1968	0.000535335	0.00923741
MKLN1	7q32.3	0.196763	0.000536667	0.00925244
FAM72A	1q32.1	0.196735	0.000537657	0.00926155
SLC29A1	6p21.1	-0.1967	0.00053892	0.00927368
YBX1	1p34.2	-0.196678	0.000539718	0.00927368
ACAA2	18q21.1	-0.196677	0.000539748	0.00927368
CUTALP	9q33.2	0.196565	0.000543769	0.00933478
POGZ	1q21.3	0.196471	0.000547207	0.00938195
DHFR2	3q11.2	0.196464	0.000547452	0.00938195
N4BP2L2-IT2	13q13.1	0.196422	0.00054898	0.00940011
PHTF1	1p13.2	-0.196391	0.000550098	0.0094061
ZNF71	19q13.43	-0.196387	0.000550267	0.0094061
BSCL2	11q12.3	-0.196342	0.000551926	0.00942642
DMRTA1	9p21.3	0.196303	0.000553339	0.00944253
DNAJC18	5q31.2	-0.196285	0.000554006	0.00944587
RNASEK	17p13.1	-0.196241	0.000555629	0.0094655
MAMDC4	9q34.3	0.19619	0.000557535	0.00948992
VPS13D	1p36.22-p36.21	0.196171	0.000558234	0.00949377
CRLS1	20p12.3	-0.196155	0.000558825	0.00949577
PIGT	20q13.12	-0.196136	0.00055951	0.00949936
NUFIP2	17q11.2	0.196118	0.000560211	0.00950323
PSMC1	14q32.11	-0.1961	0.000560882	0.00950658
ITSN2	2p23.3	0.196068	0.00056207	0.00951867
LOC202181	5q35.3	0.196045	0.000562938	0.00952533
SV2A	1q21.2	-0.195953	0.000566355	0.00957128
ST7L	1p13.2	0.195947	0.000566608	0.00957128
STX8	17p13.1	-0.195922	0.000567554	0.0095792
DHX33	17p13.2	0.195868	0.000569593	0.00960554
SNX29P2	16p11.2	0.195827	0.000571139	0.00961013
PSMB5	14q11.2	-0.195821	0.00057137	0.00961013
KHDC4	1q22	0.195806	0.00057191	0.00961013
TRAPPC1	17p13.1	-0.1958	0.000572164	0.00961013
NOX4	11q14.3	-0.195797	0.00057226	0.00961013
ZNF384	12p13.31	0.195775	0.000573087	0.00961598
MAPK6	15q21.2	0.195739	0.000574474	0.00963049
FAR2P1	2q21.1	-0.195728	0.000574911	0.00963049
PAXIP1	7q36.2	0.19566	0.000577482	0.00966549
NPC2	14q24.3	-0.195578	0.00058065	0.00970475
MMP24	20q11.22	-0.195574	0.000580795	0.00970475
AP4E1	15q21.2	0.195486	0.000584174	0.00975309
NLE1	17q12	-0.195458	0.000585262	0.00975636
LRP3	19q13.11	-0.195456	0.000585343	0.00975636
ST7-OT4	7q31.2	0.195337	0.000589995	0.00982574
KIF16B	20p12.1	0.195233	0.000594059	0.00988522
PAPOLG	2p16.1	0.195219	0.000594619	0.00988634
CWC25	17q12	0.195101	0.000599267	0.00995537
DCAF8	1q23.2	0.195078	0.000600197	0.00996257
MED1	17q12	0.195053	0.000601162	0.00997034
C3ORF18	3p21.31	-0.194999	0.00060333	0.00999803
SEC31A	4q21.22	0.194968	0.000604583	0.0100105
ENHO	9p13.3	-0.194926	0.000606258	0.0100231
STXBP3	1p13.3	0.194924	0.000606343	0.0100231
TRIM40	6p22.1	0.194879	0.000608111	0.0100441
ATP2B4	1q32.1	0.194836	0.000609843	0.0100623
ANKRD20A3	9q21.11	0.194827	0.000610219	0.0100623
ALS2CL	3p21.31	0.19479	0.000611718	0.0100689
MIA3	1q41	0.194787	0.000611853	0.0100689
KIAA2013	1p36.22	-0.19478	0.000612124	0.0100689
CHMP4B	20q11.22	-0.194647	0.000617529	0.0101495
INO80	15q15.1	0.194502	0.000623461	0.0102386
FUT3	19p13.3	0.194471	0.000624719	0.0102509
DEXI	16p13.13	-0.194426	0.000626602	0.0102734
SLN	11q22.3	-0.194347	0.000629842	0.0103134
FBLN7	2q13-q14.1	-0.194342	0.000630071	0.0103134
GNRH1	8p21.2	0.194326	0.000630732	0.0103158
STYXL1	7q11.23	-0.194284	0.000632492	0.0103274
FRRS1	1p21.2	0.194273	0.000632928	0.0103274
PKDREJ	22q13.31	0.194272	0.000632985	0.0103274
MRPS15	1p34.3	-0.194251	0.000633837	0.0103329
SMG1P3	16p12.2	0.1942	0.000635991	0.0103596
XRCC2	7q36.1	0.194175	0.000637026	0.0103662
SPINDOC	11q13.1	-0.194165	0.00063743	0.0103662
MRPS26	20p13	-0.194032	0.00064306	0.0104493
USP53	4q26	0.193979	0.000645296	0.0104772
EID2B	19q13.2	-0.193915	0.000648039	0.0105132
HMGXB4	22q12.3	0.193773	0.000654097	0.0105976
B4GALT2	1p34.1	-0.193768	0.000654295	0.0105976
FEM1B	15q23	0.193725	0.00065617	0.0106042
NOVA2	19q13.32	-0.193713	0.000656676	0.0106042
ANAPC2	9q34.3	0.193713	0.000656676	0.0106042
MLLT11	1q21.3	-0.19371	0.00065682	0.0106042
HASPIN	17p13.2	0.193651	0.000659354	0.0106366
MAPK8IP1	11p11.2	-0.19363	0.000660262	0.0106427
NARF	17q25.3	-0.193612	0.000661043	0.0106467
SLC16A7	12q14.1	0.193595	0.000661807	0.0106505
ASAH2B	10q11.23	0.19358	0.000662423	0.0106518
LENG8	19q13.42	0.193536	0.000664359	0.0106744
MORC3	21q22.12	0.193519	0.000665108	0.0106779
MPND	19p13.3	-0.193473	0.000667103	0.0107014
SMAD3	15q22.33	0.193368	0.000671719	0.0107668
ERAL1	17q11.2	-0.193341	0.000672901	0.0107772
HR	8p21.3	0.193319	0.000673881	0.0107842
TUBA3FP	22q11.21	-0.193292	0.000675097	0.0107911
KYAT1	9q34.11	0.193262	0.00067642	0.0107911
FAM117A	17q21.33	-0.193258	0.000676587	0.0107911
SETD1B	12q24.31	0.193256	0.00067668	0.0107911
PGP	16p13.3	-0.193249	0.000676996	0.0107911
ZNF276	16q24.3	0.193229	0.000677889	0.0107962
ERI2	16p12.3	0.193217	0.000678391	0.0107962
LINC00313	21q22.3	0.193162	0.000680834	0.0108265
SRSF3	6p21.31-p21.2	-0.193141	0.000681769	0.0108327
SULT1B1	4q13.3	0.193126	0.00068247	0.0108353
ZBTB8B	1p35.1	-0.193065	0.000685188	0.0108698
TBC1D15	12q21.1	0.19302	0.000687194	0.0108931
RBBP5	1q32.1	0.192994	0.000688363	0.010903
ACVR1B	12q13.13	0.192953	0.000690234	0.010924
BARD1	2q35	0.192885	0.000693305	0.0109553
USP9Y	Yq11.221	-0.192885	0.000693306	0.0109553
SRFBP1	5q23.1	0.192816	0.000696427	0.010996
UBE2L3	22q11.21	-0.192775	0.000698298	0.0110143
SEC1P	19q13.33	0.192758	0.000699101	0.0110143
GOLGA6L10	15q25.2	0.192755	0.000699236	0.0110143
PFDN6	6p21.32	-0.192738	0.000700021	0.0110181
CLOCK	4q12	0.19262	0.000705446	0.0110947
VASN	16p13.3	-0.192449	0.000713362	0.0112066
ATAD2	8q24.13	0.192442	0.000713674	0.0112066
POLR2I	19q13.12	-0.192387	0.000716235	0.011238
NOC2L	1p36.33	-0.192326	0.000719098	0.0112741
PUS3	11q24.2	0.192293	0.000720632	0.0112804
RAPGEF6	5q31.1	0.192292	0.000720691	0.0112804
TRUB2	9q34.11	0.192282	0.000721184	0.0112804
SNRNP25	16p13.3	-0.192235	0.000723374	0.0113058
CSPP1	8q13.1-q13.2	0.192187	0.000725649	0.0113325
LINC00598	13q14.11	0.192147	0.000727527	0.0113441
NR3C1	5q31.3	0.19214	0.000727871	0.0113441
TNNT2	1q32.1	0.192127	0.000728517	0.0113441
KCTD17	22q12.3	-0.192124	0.000728647	0.0113441
RAB36	22q11.23	-0.192069	0.000731237	0.0113755
MAP3K1	5q11.2	0.191996	0.000734737	0.0114194
TMEM240	1p36.33	-0.191987	0.000735193	0.0114194
ARID4B	1q42.3	0.191944	0.000737226	0.0114421
SLC45A1	1p36.23	-0.191914	0.000738675	0.0114557
NHP2	5q35.3	-0.191894	0.000739622	0.0114616
MAN2B2	4p16.1	-0.191855	0.0007415	0.0114818
DUOX1	15q21.1	0.191829	0.000742795	0.011493
RTF2	20q13.31	-0.191805	0.000743909	0.0115014
TFDP2	3q23	-0.191777	0.000745289	0.0115138
MAP6D1	3q27.1	-0.191754	0.000746407	0.0115222
KBTBD2	7p14.3	0.191738	0.00074718	0.0115253
SLC44A1	9q31.1-q31.2	0.191723	0.000747893	0.0115274
DAZAP1	19p13.3	-0.191659	0.000751016	0.0115667
NUP50	22q13.31	0.191558	0.000756001	0.0116345
VARS	6p21.33	-0.191536	0.000757072	0.0116421
TGFB1I1	16p11.2	-0.191393	0.000764108	0.0117413
PCDHGA6	5q31.3	0.191288	0.00076935	0.0118128
AKAP8	19p13.12	0.191211	0.000773219	0.0118631
SEC61A1	3q21.3	-0.191194	0.00077406	0.0118637
SNAPC2	19p13.2	-0.191186	0.000774439	0.0118637
TRIM29	11q23.3	0.191106	0.000778489	0.0119166
SSU72	1p36.33	-0.190989	0.00078443	0.0119984
SRRM5	19q13.31	0.190952	0.000786306	0.012018
LOC153684	5p12	0.190934	0.000787203	0.0120225
SMARCB1	22q11.23|22q11	-0.190892	0.000789363	0.0120444
GPR15	3q11.2	0.190883	0.000789836	0.0120444
PLAAT3	11q12.3-q13.1	-0.190866	0.000790713	0.0120486
GAN	16q23.2	0.190751	0.000796611	0.0121293
RCN2	15q24.3	-0.190709	0.000798795	0.0121533
PHB	17q21.33	-0.19068	0.000800269	0.0121659
KRTAP5-6	11p15.5	0.190658	0.00080139	0.0121659
SRSF12	6q15	-0.190658	0.000801441	0.0121659
EVPL	17q25.1	0.190621	0.000803311	0.0121759
SLC30A4	15q21.1|15q21.1	0.190621	0.000803311	0.0121759
RBPMS2	15q22.31	-0.190597	0.000804574	0.0121858
LINC00893	Xq28	0.190557	0.000806647	0.012208
GOSR1	17q11.2	0.19053	0.00080809	0.0122206
EFEMP2	11q13.1	-0.190478	0.000810774	0.012252
SPATA2L	16q24.3	-0.190381	0.000815916	0.0123204
ORAI2	7q22.1	-0.190356	0.000817198	0.0123242
NAIP	5q13.2	0.190353	0.000817397	0.0123242
GDE1	16p12.3	-0.190339	0.000818105	0.0123256
MMP23B	1p36.33	-0.190313	0.000819479	0.0123371
ATOX1	5q33.1	-0.19024	0.000823344	0.012386
ARFRP1	20q13.33	-0.190152	0.000828033	0.0124401
DDX3Y	Yq11.221	-0.19015	0.000828181	0.0124401
EIF1B	3p22.1	-0.189964	0.000838162	0.0125806
PLXND1	3q22.1	-0.189928	0.000840111	0.0126004
ECD	10q22.2	0.189915	0.000840837	0.0126019
PGBD2	1q44	0.189899	0.000841655	0.0126023
ZNF718	4p16.3	0.189891	0.00084212	0.0126023
RALGPS2	1q25.2	0.189872	0.000843133	0.012608
RPL23AP7	2q14.1	-0.189811	0.000846462	0.0126479
PPP4C	16p11.2	-0.1898	0.000847056	0.0126479
POLR2A	17p13.1	0.189783	0.000847994	0.0126524
AQP7	9p13.3	0.189695	0.000852816	0.0127061
MRTO4	1p36.13	-0.189694	0.000852857	0.0127061
ATXN7	3p14.1	0.189672	0.000854054	0.0127138
CPS1-IT1	2q34	0.189653	0.00085514	0.0127138
TMEM8A	16p13.3	-0.18965	0.000855276	0.0127138
CCM2L	20q11.21	-0.189627	0.000856545	0.0127233
LUC7L2	7q34	0.189608	0.000857631	0.01273
BLMH	17q11.2	-0.189558	0.000860363	0.0127611
CLPP	19p13.3	-0.189521	0.000862429	0.0127823
HDAC2	6q21	-0.189454	0.000866132	0.0128277
PFN1	17p13.2	-0.189378	0.000870365	0.0128809
FAM186B	12q13.12	0.189338	0.00087265	0.0128961
ESCO2	8p21.1	0.189324	0.000873427	0.0128961
EIF2B2	14q24.3	-0.189307	0.000874357	0.0128961
OSMR	5p13.1	0.189303	0.000874616	0.0128961
LMTK2	7q21.3	0.1893	0.000874758	0.0128961
TEDC2	16p13.3	-0.189283	0.000875723	0.0128961
C11ORF68	11q13.1	-0.18928	0.000875888	0.0128961
OSCP1	1p34.3	-0.189162	0.000882536	0.0129844
EXOC1	4q12	0.189138	0.000883938	0.0129955
MCEE	2p13.3	0.189114	0.000885294	0.0130059
SLC66A1	1p36.13	-0.189095	0.000886342	0.0130061
RPS10P7	1q32.1	0.189091	0.000886603	0.0130061
TMEM267	5p12	0.189047	0.000889087	0.013033
TMSB15B	Xq22.2	-0.188983	0.000892751	0.0130772
SF3B2	11q13.1	-0.188849	0.000900435	0.013174
KMT2E	7q22.3	0.188844	0.000900725	0.013174
GPATCH11	2p22.2	0.188823	0.000901984	0.013174
ANKHD1	5q31.3	0.188823	0.000901984	0.013174
TCN2	22q12.2	-0.18877	0.000905041	0.0132008
INAVA	1q32.1	0.188768	0.000905138	0.0132008
MTR	1q43	0.188662	0.000911305	0.0132811
HHIPL1	14q32.2	-0.188638	0.0009127	0.0132918
CKLF	16q21	-0.188566	0.000916945	0.013336
FADS3	11q12.2	-0.188553	0.000917708	0.013336
RBM38	20q13.31	-0.188553	0.000917732	0.013336
SFSWAP	12q24.33	0.188521	0.00091958	0.0133437
SRM	1p36.22	-0.188521	0.000919591	0.0133437
ZGPAT	20q13.33	-0.188481	0.000921925	0.0133679
LGI3	8p21.3	0.188422	0.000925432	0.0134091
YTHDC2	5q22.2	0.188373	0.000928347	0.0134385
TRMT61A	14q32.33	-0.188356	0.000929342	0.0134385
AJM1	9q34.3	0.188354	0.000929468	0.0134385
RASD2	22q12.3	-0.188325	0.000931187	0.0134454
SSR2	1q22	-0.188323	0.000931286	0.0134454
GSTM3	1p13.3	-0.188296	0.000932909	0.013452
LRRC42	1p32.3	-0.188293	0.000933084	0.013452
EHF	11p13	0.188277	0.000934034	0.013456
OPRL1	20q13.33	-0.188249	0.000935711	0.0134684
RAD54L	1p34.1	-0.188241	0.000936238	0.0134684
CCDC18	1p22.1	0.188187	0.000939426	0.0135046
APMAP	20p11.21	-0.18801	0.000950145	0.0136489
PFKFB2	1q32.1	0.187957	0.000953377	0.0136794
HK2	2p12	0.187952	0.000953632	0.0136794
TMEM9	1q32.1	-0.187733	0.000967105	0.0138621
ZNF267	16p11.2	0.187722	0.000967751	0.0138621
UBE3C	7q36.3	0.18768	0.000970365	0.0138739
KLC4	6p21.1	-0.187676	0.000970624	0.0138739
HIPK3	11p13	0.187675	0.00097065	0.0138739
CEBPZ	2p22.2	0.187619	0.000974103	0.0139134
STARD3NL	7p14.1	-0.187484	0.000982561	0.0140141
WDR1	4p16.1	-0.187482	0.000982692	0.0140141
TOM1L2	17p11.2	0.187462	0.000983951	0.0140141
DMTF1	7q21.12	0.187457	0.000984213	0.0140141
VPS37D	7q11.23	-0.18745	0.000984645	0.0140141
DCAF17	2q31.1	0.187414	0.000986947	0.0140215
SNRPD3	22q11.23	-0.1874	0.000987789	0.0140215
SAMD9	7q21.2	0.187398	0.000987921	0.0140215
TLR5	1q41	0.187391	0.000988369	0.0140215
ZNF853	7p22.1	-0.187387	0.000988659	0.0140215
USP34	2p15	0.187371	0.000989661	0.0140258
SMYD3	1q44	-0.187352	0.000990849	0.0140327
CELSR2	1p13.3	0.187277	0.000995587	0.0140809
ERP44	9q31.1	0.187271	0.000995932	0.0140809
ZFAT	8q24.22	0.187265	0.000996357	0.0140809
RCN3	19q13.33	-0.187204	0.00100021	0.0141255
AP1S1	7q22.1	-0.187109	0.00100628	0.0142011
BYSL	6p21.1	-0.18709	0.00100748	0.0142082
LY6H	8q24.3	-0.187076	0.00100839	0.0142109
KCNN1	19p13.11	-0.187054	0.00100983	0.0142212
FOXE1	9q22.33	0.186993	0.00101374	0.0142663
PARP9	3q21.1	0.186974	0.00101497	0.0142735
CMTM8	3p22.3	-0.186958	0.00101599	0.014278
JMJD1C-AS1	10q21.3	-0.186919	0.00101851	0.0143033
MDM2	12q15	0.186907	0.00101927	0.014304
GDA	9q21.13	0.186796	0.0010265	0.0143954
VASH1	14q24.3	-0.186693	0.00103321	0.0144794
ELF1	13q14.11	0.186672	0.00103461	0.0144889
DDX21	10q22.1	0.186524	0.00104435	0.0145964
HIGD2B	15q24.1	0.186521	0.00104452	0.0145964
NUDT16L1	16p13.3	-0.186499	0.00104599	0.0145964
TMPRSS11BNL	4q13.2	0.186499	0.00104601	0.0145964
C18ORF25	18q21.1	0.186493	0.00104641	0.0145964
TTC33	5p13.1	0.186486	0.00104688	0.0145964
BRD1	22q13.33	0.186478	0.00104738	0.0145964
MAU2	19p13.11	0.186355	0.00105558	0.0147005
RAP1GAP2	17p13.3	0.186174	0.00106777	0.0148599
ACER2	9p22.1	0.186157	0.0010689	0.0148654
TCTN3	10q24.1	-0.18614	0.00107004	0.0148708
CKMT1B	15q15.3	0.186103	0.00107253	0.0148952
MAGED2	Xp11.21	-0.186047	0.00107635	0.0149378
SUMO1P3	1q23.2	-0.186036	0.00107712	0.0149382
GALNS	16q24.3	-0.186018	0.00107832	0.0149445
CCAR1	10q21.3	0.185995	0.00107989	0.0149559
ZSWIM6	5q12.1	0.185968	0.00108175	0.0149714
PRPF31	19q13.42	-0.185944	0.00108338	0.0149836
TBXA2R	19p13.3	-0.18591	0.00108575	0.015006
PVALB	22q12.3	-0.185842	0.00109038	0.01505
PCBP4	3p21.2	-0.185842	0.00109043	0.01505
SS18L2	3p22.1	-0.185831	0.00109118	0.01505
P3H4	17q21.2	-0.185802	0.00109314	0.0150667
PAXBP1	21q22.11	0.185686	0.00110121	0.0151675
EPHA2	1p36.13	0.18567	0.00110231	0.0151723
CENPL	1q25.1	0.185623	0.00110555	0.0152065
SIK3	11q23.3	0.185566	0.00110959	0.0152516
SOX12	20p13	-0.185514	0.0011132	0.0152907
GPR143	Xp22.2	-0.185457	0.00111721	0.0153127
CYP2C18	10q23.33	0.185456	0.0011173	0.0153127
PSMB2	1p34.3	-0.185455	0.00111738	0.0153127
TRAPPC2L	16q24.3	-0.185448	0.00111786	0.0153127
EDEM3	1q25.3	0.185395	0.00112158	0.0153533
C6ORF47	6p21.33	-0.185373	0.00112312	0.0153639
SLC35B2	6p21.1	-0.185349	0.00112487	0.0153773
COL26A1	7q22.1	-0.185302	0.0011282	0.0153979
BANF1	11q13.1	-0.185299	0.00112841	0.0153979
TTN	2q31.2	0.185295	0.00112868	0.0153979
LSM7	19p13.3	-0.185263	0.00113096	0.0154185
ZHX1	8q24.13	0.18522	0.00113402	0.0154498
SERINC4	15q15.3	0.185157	0.00113852	0.0154924
NBPF11	1q21.2	0.185155	0.00113869	0.0154924
TARBP2	12q13.13	-0.185131	0.0011404	0.0155052
TRIP11	14q32.12	0.185117	0.0011414	0.0155082
ADCY9	16p13.3	0.185073	0.00114459	0.015541
DENND4B	1q21.3	0.185047	0.0011464	0.0155459
GUSBP2	6p22.2	0.185043	0.00114674	0.0155459
FBXW10	17p11.2	0.185025	0.00114803	0.0155459
NFRKB	11q24.3	0.185016	0.0011487	0.0155459
NDUFB11	Xp11.3	-0.185014	0.00114882	0.0155459
MPZL2	11q23.3	0.184996	0.00115012	0.0155466
SYCE1L	16q23.1	-0.184992	0.00115043	0.0155466
CALCOCO1	12q13.13	0.184977	0.00115149	0.0155505
SNORA8	11q21	0.184951	0.00115337	0.0155655
SPAAR	9p13.3	-0.184935	0.00115457	0.0155711
EIF2S2	20q11.22	-0.1849	0.00115705	0.0155942
SNHG4	5q31.2	0.184858	0.00116015	0.0156176
TXNL4A	18q23	-0.184855	0.00116034	0.0156176
STXBP5	6q24.3	0.184842	0.00116129	0.0156199
RBM27	5q32	0.184735	0.00116914	0.0157149
PCGF5	10q23.32	0.184676	0.00117352	0.0157632
HLX	1q41	-0.184534	0.00118399	0.0158932
KMT2A	11q23.3	0.184476	0.00118833	0.0159407
AMPD3	11p15.4	0.184459	0.00118961	0.0159472
DSG4	18q12.1	0.184439	0.00119107	0.0159544
GLIPR2	9p13.3	-0.18443	0.00119173	0.0159544
AP1S3	2q36.1	0.184381	0.00119541	0.0159931
SYS1	20q13.12	-0.184346	0.00119807	0.0160179
LINC00923	15q26.2	0.184298	0.00120168	0.016049
HAR1B	20q13.33	0.184293	0.001202	0.016049
CRIP2	14q32.33	-0.184255	0.00120488	0.0160708
KSR1	17q11.2	0.18425	0.00120523	0.0160708
TBC1D1	4p14	-0.184228	0.00120691	0.0160825
XK	Xp21.1	0.184207	0.00120853	0.016088
OCA2	15q12-q13.1	0.184202	0.00120892	0.016088
RBM41	Xq22.3	0.184178	0.00121068	0.0161007
POLR2L	11p15.5	-0.184139	0.00121367	0.0161211
ANO8	19p13.11	0.184128	0.00121453	0.0161211
SUN1	7p22.3	0.184127	0.00121463	0.0161211
ULK3	15q24.1	0.184101	0.0012166	0.0161367
MFSD14B	9q22.32	0.184085	0.00121779	0.0161417
GNG5	1p22.3	-0.184039	0.00122134	0.0161781
PRDM15	21q22.3	0.184024	0.00122242	0.0161818
ETV5	3q27.2	-0.183959	0.00122743	0.0162374
MYSM1	1p32.1	0.183922	0.0012303	0.016259
SLC35B1	17q21.33	-0.183917	0.00123069	0.016259
MBNL3	Xq26.2	0.183898	0.00123209	0.0162668
GTF3C4	9q34.13	0.183831	0.00123731	0.016325
CDKN2A-DT	9p21.3	0.183782	0.00124108	0.016364
CHRNA1	2q31.1	-0.183747	0.00124381	0.0163892
CAPN10	2q37.3	-0.183725	0.0012455	0.0163917
BRWD1	21q22.2	0.183724	0.00124563	0.0163917
ADSS	1q44	0.183696	0.00124779	0.0164093
RNASEH2C	11q13.1	-0.183665	0.00125024	0.0164308
MFN2	1p36.22	0.183549	0.0012593	0.016539
PCDHGA3	5q31.3	0.183537	0.00126021	0.0165402
BAIAP2-DT	17q25.3	-0.183508	0.00126249	0.0165485
TCEAL3	Xq22.2	-0.183507	0.00126259	0.0165485
TUBA1B	12q13.12	-0.183498	0.00126332	0.0165485
ERCC6	10q11.23	0.183416	0.00126981	0.0166226
CYP4F3	19p13.12	0.183394	0.00127156	0.0166348
MRAS	3q22.3	-0.18335	0.00127503	0.0166692
VPS13B	8q22.2	0.183254	0.00128268	0.0167387
BACH1	21q21.3	0.183253	0.00128274	0.0167387
PPP1R13L	19q13.32	0.183251	0.00128291	0.0167387
GGT7	20q11.22	-0.183242	0.00128368	0.0167387
KIF7	15q26.1	-0.183226	0.00128492	0.016744
AKAP14	Xq24	-0.183201	0.0012869	0.016759
CTAGE6	7q35	0.183167	0.00128964	0.0167837
ABCF1	6p21.33	-0.183104	0.00129475	0.0168393
SPDYE6	7q22.1	0.182999	0.00130324	0.0169387
KLHL12	1q32.1	0.182845	0.00131579	0.0170907
POLK	5q13.3	0.182809	0.00131874	0.0171058
OR51E1	11p15.4	-0.182795	0.00131989	0.0171058
SMG1P2	16p11.2	0.18279	0.00132028	0.0171058
EFTUD2	17q21.31	-0.182789	0.00132035	0.0171058
TUSC2	3p21.31	-0.18272	0.00132604	0.0171684
CCDC166	8q24.3	0.182705	0.00132727	0.0171732
BRCA2	13q13.1	0.182678	0.0013295	0.0171909
FAM71F2	7q32.1	0.182627	0.00133376	0.0172349
ZSCAN1	19q13.43	-0.182595	0.00133637	0.0172576
SRGAP1	12q14.2	0.182556	0.00133964	0.0172887
GBAP1	1q22	-0.182519	0.00134271	0.0173172
SLC31A1	9q32	0.182445	0.00134891	0.0173859
TXNDC15	5q31.1	-0.18242	0.00135101	0.0174019
WNT9A	1q42.13	0.18223	0.00136701	0.0175895
ANKS6	9q22.33	0.182226	0.00136733	0.0175895
PSMD13	11p15.5	-0.182141	0.00137459	0.0176716
KRTAP12-1	21q22.3	-0.182043	0.00138296	0.0177677
MRPL20	1p36.33	-0.181994	0.00138717	0.0178105
PATL1	11q12.1	0.181885	0.0013966	0.01792
ERCC4	16p13.12	0.181784	0.00140531	0.0180203
MIS12	17p13.2	0.181768	0.0014067	0.0180266
CLINT1	5q33.3	0.181748	0.00140841	0.0180363
TACC3	4p16.3	-0.181739	0.00140925	0.0180363
ZBTB11	3q12.3	0.181693	0.00141327	0.0180762
STRIP2	7q32.1	0.181679	0.00141444	0.0180797
CDC42BPB	14q32.32	0.181643	0.0014176	0.0181084
CFAP36	2p16.1	-0.181549	0.00142588	0.0182027
RBMXL1	1p22.2	0.181431	0.00143636	0.0183203
DAPK3	19p13.3	-0.181424	0.00143692	0.0183203
NOXA1	9q34.3	0.181378	0.00144101	0.0183442
TNRC6A	16p12.1	0.181377	0.00144109	0.0183442
PSMD3	17q21.1	-0.181372	0.00144154	0.0183442
SOWAHB	4q21.1	0.181258	0.00145171	0.0184619
SBNO1	12q24.31	0.181221	0.00145505	0.0184927
CHURC1	14q23.3	0.181187	0.00145814	0.0185064
ZDHHC16	10q24.1	-0.181182	0.00145855	0.0185064
AGK	7q34	0.181178	0.00145889	0.0185064
SIK2	11q23.1	0.181158	0.00146074	0.0185181
DDX60	4q32.3	0.181141	0.00146229	0.018523
DAB2IP	9q33.2	0.181128	0.00146342	0.018523
CASP8AP2	6q15	0.181121	0.00146406	0.018523
OBSCN	1q42.13	0.181113	0.00146482	0.018523
SOWAHD	Xq24	-0.181094	0.0014665	0.0185326
HNRNPF	10q11.21	0.180982	0.00147667	0.0186493
LAMB2	3p21.31	-0.18097	0.00147777	0.0186516
IDH3A	15q25.1	0.180938	0.00148068	0.0186764
S100A4	1q21.3	-0.180882	0.00148577	0.0187289
SNX1	15q22.31	0.180864	0.00148741	0.0187379
REEP4	8p21.3	0.180832	0.00149037	0.0187633
BSG	19p13.3	-0.1808	0.0014933	0.0187878
HSPA4L	4q28.1	0.180779	0.00149522	0.0187878
CGRRF1	14q22.2	-0.180772	0.00149592	0.0187878
G6PD	Xq28	-0.180763	0.00149677	0.0187878
TMEM177	2q14.2	-0.18076	0.001497	0.0187878
CEP44	4q34.1	0.18073	0.00149978	0.018811
ANKRD17	4q13.3	0.180699	0.0015026	0.0188346
FBXO39	17p13.1	0.180609	0.00151102	0.0189191
CALN1	7q11.22	-0.180606	0.00151123	0.0189191
MBLAC2	5q14.3	0.180577	0.00151395	0.0189414
SHPK	17p13.2	0.180536	0.00151781	0.0189779
C9ORF78	9q34.11	0.180523	0.00151903	0.0189812
RAB11FIP1	8p11.23	0.180506	0.00152059	0.0189835
SETDB1	1q21.3	0.1805	0.0015211	0.0189835
TSIX	Xq13.2	-0.180445	0.00152628	0.0190311
ARGLU1	13q33.3	0.180435	0.00152726	0.0190311
PPT1	1p34.2	-0.180417	0.00152891	0.0190311
ITPA	20p13	-0.180412	0.00152935	0.0190311
YTHDF3	8q12.3	0.180409	0.00152966	0.0190311
TCHP	12q24.11	0.18039	0.00153143	0.0190414
HSPA1A	6p21.33	-0.180301	0.00153985	0.0191342
TOMM5	9p13.2	0.180264	0.00154338	0.0191661
C4ORF36	4q21.3	0.180242	0.00154548	0.0191804
NUP205	7q33	0.180206	0.00154882	0.01921
CRELD2	22q13.33	-0.180192	0.00155018	0.01921
RCE1	11q13.2	-0.180185	0.0015509	0.01921
VIM	10p13	-0.180176	0.00155169	0.01921
TAS2R4	7q34	0.180043	0.00156442	0.0193552
FBXO22	15q24.2	0.180033	0.00156535	0.0193552
NR5A1	9q33.3	0.180016	0.00156698	0.0193634
TCF20	22q13.2|22q13.3	0.180001	0.00156845	0.0193696
FAM76B	11q21	0.179974	0.00157111	0.0193905
MFHAS1	8p23.1	0.179908	0.00157741	0.0194564
MRPL52	14q11.2	-0.179876	0.00158057	0.0194645
ABI1	10p12.1	0.179873	0.00158078	0.0194645
CDC42SE1	1q21.3	0.179871	0.00158098	0.0194645
MAPK8IP3	16p13.3	0.179834	0.00158461	0.0194972
RNF121	11q13.4	-0.179816	0.00158638	0.0195071
SVEP1	9q31.3	0.179804	0.00158757	0.0195096
CCDC15	11q24.2	0.179775	0.00159038	0.0195323
ANLN	7p14.2	0.179631	0.00160443	0.0196927
NAB1	2q32.2	0.179556	0.00161185	0.0197717
TVP23B	17p11.2	0.179536	0.00161375	0.019773
CDK2AP2	11q13.2	-0.179525	0.00161486	0.019773
CSAD	12q13.13	0.179525	0.0016149	0.019773
PTER	10p13	0.179481	0.00161921	0.0198087
FXYD6	11q23.3	-0.179475	0.00161979	0.0198087
FIGNL1	7p12.2	0.179417	0.00162561	0.0198677
TCEAL4	Xq22.2	-0.179354	0.00163182	0.0199187
HEATR5A	14q12	0.179345	0.00163274	0.0199187
TFPT	19q13.42	-0.179344	0.00163278	0.0199187
ACP2	11p11.2|11p12-p11	-0.179331	0.00163416	0.0199187
B3GALNT1	3q26.1	-0.179325	0.00163475	0.0199187
PLEKHG5	1p36.31	0.179296	0.00163764	0.0199273
TMEM246	9q31.1	0.179276	0.00163961	0.0199273
THBS4	5q14.1	-0.179265	0.0016407	0.0199273
TRAIP	3p21.31	-0.179265	0.00164074	0.0199273
ELP6	3p21.31	-0.179262	0.00164099	0.0199273
C7ORF50	7p22.3	-0.179258	0.00164141	0.0199273
PRSS50	3p21.31	-0.179231	0.00164411	0.0199425
NAA25	12q24.13	0.179226	0.00164465	0.0199425
H1FNT	12q13.11	0.179121	0.00165519	0.0200582
ADRA1B	5q33.3	-0.179097	0.00165765	0.0200759
KLF3	4p14	0.17903	0.00166445	0.020146
GOLGA5	14q32.12	0.17898	0.00166956	0.0201957
ARFGEF2	20q13.13	0.17894	0.00167357	0.0202321
UFD1	22q11.21	-0.178929	0.00167477	0.0202343
SNRNP40	1p35.2	-0.178891	0.00167858	0.0202616
ESF1	20p12.1	0.178887	0.00167905	0.0202616
SPDYE7P	7q11.23	0.178856	0.00168222	0.0202878
STYK1	12p13.2	0.178843	0.00168356	0.0202917
CAMK1	3p25.3	-0.178799	0.00168803	0.0203334
DQX1	2p13.1	0.178773	0.00169071	0.0203534
ABRAXAS2	10q26.13	0.178741	0.00169399	0.0203807
UBE2Q2P1	15q25.2	0.178727	0.00169551	0.0203868
GABPA	21q21.3	0.17864	0.00170452	0.0204826
CTR9	11p15.4	0.17863	0.00170552	0.0204826
BIRC5	17q25.3	-0.178616	0.001707	0.0204842
COMMD6	13q22.2	-0.178604	0.00170822	0.0204842
SERPINB8	18q22.1	0.178596	0.00170909	0.0204842
NIPSNAP3A	9q31.1	0.178583	0.0017104	0.0204842
NBPF9	1q21.2	0.178576	0.00171118	0.0204842
TNFAIP1	17q11.2	0.178568	0.00171193	0.0204842
UBE2I	16p13.3	-0.17856	0.0017128	0.0204842
XPOT	12q14.2	0.178528	0.00171612	0.0205117
LY6G5C	6p21.33	-0.178483	0.0017208	0.0205554
CYP3A4	7q22.1	0.17843	0.0017264	0.0206007
VCPIP1	8q13.1	0.178424	0.001727	0.0206007
SOX11	2p25.2	-0.178418	0.00172768	0.0206007
ARNTL	11p15.3	0.178386	0.00173105	0.0206206
CCDC51	3p21.31	0.178382	0.0017314	0.0206206
MCM3AP-AS1	21q22.3	0.17833	0.00173692	0.0206645
RAB11FIP3	16p13.3	-0.178328	0.00173714	0.0206645
TC2N	14q32.12	0.178269	0.00174339	0.0207265
TCEAL5	Xq22.1	-0.178252	0.00174514	0.0207351
KLHL22	22q11.21	-0.178196	0.00175113	0.0207939
PTGIR	19q13.32	-0.178117	0.00175961	0.0208822
CHD1	5q15-q21.1	0.1781	0.0017614	0.0208831
ZNF33A	10p11.1	0.178096	0.00176176	0.0208831
EME2	16p13.3	0.178041	0.00176773	0.0209346
TMEM150A	2p11.2	-0.178025	0.00176939	0.0209346
FAM160A1	4q31.3	0.178013	0.00177074	0.0209346
SOX18	20q13.33	-0.178013	0.00177074	0.0209346
BLOC1S4	4p16.1	-0.178007	0.00177133	0.0209346
FCHO2	5q13.2	0.177992	0.00177295	0.0209415
CHKB-CPT1B	22q13.33	0.17798	0.00177426	0.0209446
NDUFS5	1p34.3	-0.177945	0.001778	0.02097
ZNF7	8q24.3	0.177941	0.0017785	0.02097
GCDH	19p13.13	-0.177928	0.00177981	0.0209731
DDX55	12q24.31	0.177887	0.00178425	0.0210131
NKTR	3p22.1	0.177856	0.00178769	0.0210413
LRRC29	16q22.1	-0.17784	0.00178942	0.0210493
ANKEF1	20p12.2	0.177815	0.0017921	0.0210685
SNX13	7p21.1	0.177738	0.00180054	0.0211553
PCDHGA9	5q31.3	0.177725	0.00180186	0.0211584
SCEL	13q22.3	0.17765	0.00181015	0.0212434
GRB14	2q24.3	-0.177627	0.00181266	0.0212604
SERGEF	11p15.1	-0.177504	0.00182616	0.0214062
SNF8	17q21.32	-0.177492	0.00182746	0.0214089
ACTL7B	9q31.3	0.177465	0.00183046	0.0214315
ZSCAN32	16p13.3	0.177408	0.00183684	0.0214937
MAP1A	15q15.3	-0.177391	0.00183875	0.0215025
HOMER3	19p13.11	-0.177369	0.00184122	0.0215025
GTPBP6	Xp22.33 and Yp11.31	-0.177359	0.00184225	0.0215025
ZNF774	15q26.1	0.177353	0.00184295	0.0215025
SART3	12q23.3	0.177353	0.00184295	0.0215025
APPL2	12q23.3	0.177288	0.00185024	0.0215751
MGAT1	5q35.3	-0.177203	0.00185978	0.0216709
HIST2H2AC	1q21.2	-0.177195	0.00186062	0.0216709
SLC25A16	10q21.3	0.177148	0.00186595	0.0217204
SBDS	7q11.21	0.177108	0.00187049	0.0217606
MS4A2	11q12.1	0.17707	0.00187475	0.0217741
FAM214A	15q21.2-q21.3	0.177067	0.00187509	0.0217741
PIMREG	17p13.2	-0.177063	0.00187556	0.0217741
GNAZ	22q11.22-q11.23	-0.177059	0.00187599	0.0217741
SREK1	5q12.3	0.177028	0.0018795	0.0218022
THAP11	16q22.1	-0.17701	0.0018816	0.0218075
PDIA6	2p25.1	-0.177002	0.00188245	0.0218075
LOC100130691	2q31.2	0.176995	0.00188321	0.0218075
CPTP	1p36.33	-0.176961	0.00188712	0.0218331
DIS3L	15q22.31	0.176957	0.0018876	0.0218331
WDR31	9q32	0.176941	0.00188941	0.0218414
RESF1	12p11.21	0.176867	0.00189784	0.0219262
APBB1	11p15.4	-0.17683	0.00190216	0.0219525
C19ORF71	19p13.3	0.176828	0.0019023	0.0219525
INTS2	17q23.2	0.176809	0.00190451	0.0219654
MOGS	2p13.1	-0.176768	0.00190923	0.0220072
TMEM168	7q31.1	0.176711	0.00191585	0.0220649
CENPX	17q25.3	-0.176702	0.00191682	0.0220649
PRC1	15q26.1	0.176696	0.00191754	0.0220649
ALG10B	12q12	0.176592	0.00192963	0.0221913
SELENOM	22q12.2	-0.176541	0.00193553	0.0222464
C17ORF75	17q11.2	-0.176419	0.00194974	0.022378
HEYL	1p34.2	-0.176418	0.00194989	0.022378
SMPDL3B	1p35.3	-0.176414	0.00195033	0.022378
PDE8A	15q25.3	0.176384	0.00195392	0.0224065
COPA	1q23.2	0.17636	0.00195673	0.0224258
TUBGCP5	15q11.2	0.176332	0.00196004	0.0224509
TLR3	4q35.1	0.176291	0.00196488	0.0224839
PSMB3	17q12	-0.176289	0.00196515	0.0224839
HSPBP1	19q13.42	-0.176248	0.00196994	0.0225258
ZBTB39	12q13.3	0.176219	0.00197341	0.0225378
BCL9L	11q23.3	0.176215	0.00197391	0.0225378
PDIA5	3q21.1	-0.176211	0.00197436	0.0225378
DTX2P1-UPK3BP1-PMS2P11	7q11.23	0.176102	0.00198727	0.0226723
CISD3	17q12	-0.176074	0.00199068	0.0226983
ZNF608	5q23.2	-0.176005	0.00199891	0.0227792
RGL2	6p21.32	-0.175983	0.00200163	0.0227938
MSLNL	16p13.3	0.175976	0.00200246	0.0227938
PSMC3	11p11.2	-0.175945	0.00200621	0.0228227
C2ORF70	2p23.3	-0.175936	0.00200728	0.0228227
TUFT1	1q21.3	0.175904	0.00201106	0.0228528
SENP8	15q23	0.175884	0.00201349	0.0228674
ZDHHC24	11q13.2	-0.17586	0.00201638	0.0228838
PRKCZ	1p36.33	-0.175847	0.002018	0.0228838
CERCAM	9q34.11	-0.175844	0.00201835	0.0228838
SEC13	3p25.3	-0.175713	0.00203424	0.0230509
PBDC1	Xq13.3	-0.175644	0.00204274	0.0231341
LIMD2	17q23.3	-0.175611	0.00204674	0.0231664
NCAPG2	7q36.3	0.175561	0.00205292	0.0232232
FBXO8	4q34.1	0.175544	0.00205503	0.0232308
CCL2	17q12	-0.175537	0.00205591	0.0232308
INTS11	1p36.33	-0.175509	0.00205926	0.0232556
GRN	17q21.31	-0.175473	0.00206376	0.023271
RASL10B	17q12	-0.175467	0.00206449	0.023271
DGCR9	22q11.21	0.17546	0.00206532	0.023271
HIST1H3E	6p22.2	0.175452	0.0020664	0.023271
FOXD4L6	9p11.2	0.175451	0.00206642	0.023271
MRPS23	17q22	-0.175429	0.00206915	0.0232887
CAMKK1	17p13.2	0.175411	0.00207144	0.0233013
CAMSAP2	1q32.1	0.175383	0.00207492	0.0233164
TLE4	9q21.31	0.175381	0.0020751	0.0233164
CWF19L2	11q22.3	0.175308	0.0020842	0.0234055
ELOVL1	1p34.2	-0.175254	0.00209105	0.0234667
OR13J1	9p13.3	0.175242	0.00209245	0.0234667
ALKBH8	11q22.3	0.175237	0.00209315	0.0234667
ZKSCAN1	7q22.1	0.175225	0.00209467	0.0234706
NBPF14	1q21.2	0.175213	0.00209609	0.0234734
SWT1	1q25.3	0.175166	0.00210197	0.0235262
DPH3	3p25.1	-0.175152	0.00210377	0.0235331
EEF1AKMT1	13q12.11	-0.175063	0.00211496	0.0236396
JAGN1	3p25.3	-0.175049	0.00211682	0.0236396
SIAE	11q24.2	0.175049	0.00211682	0.0236396
YDJC	22q11.21	-0.174991	0.00212409	0.0237076
PPRC1	10q24.32	0.174933	0.00213149	0.0237769
UBN2	7q34	0.174857	0.00214116	0.0238715
LDHAL6B	15q22.2	0.174748	0.00215515	0.0240142
ELP3	8p21.1	0.174725	0.00215808	0.0240335
AGBL5	2p23.3	-0.17471	0.00216003	0.0240418
ESAM	11q24.2	-0.174671	0.00216516	0.0240856
IDI2-AS1	10p15.3	0.174659	0.00216667	0.0240891
ETS2	21q22.2	0.174601	0.0021741	0.0241453
ESPL1	12q13.13	0.174591	0.0021754	0.0241453
NUDT16	3q22.1	-0.174579	0.00217698	0.0241453
RBM12B	8q22.1	0.174574	0.00217769	0.0241453
MARCKS	6q21	-0.174573	0.00217774	0.0241453
GRAP	17p11.2	-0.174549	0.0021809	0.0241669
SF3A3	1p34.3	-0.174501	0.00218711	0.0242224
ATE1	10q26.13	0.174445	0.00219444	0.0242901
CORO1C	12q24.11	0.174428	0.00219674	0.0243022
LRFN3	19q13.12	-0.174388	0.00220195	0.0243464
MACC1	7p21.1	0.174375	0.0022036	0.0243483
ILRUN	6p21.31	-0.174368	0.00220459	0.0243483
LRRC71	1q23.1	-0.174359	0.00220576	0.0243483
THOP1	19p13.3	-0.174322	0.00221053	0.0243869
BCL7C	16p11.2	-0.174314	0.00221169	0.0243869
RAB35	12q24.23	0.174272	0.00221716	0.0244338
CELSR1	22q13.31	0.174239	0.00222153	0.0244685
TIGD6	5q32	0.174196	0.00222729	0.0245186
TCN1	11q12.1	0.174167	0.00223106	0.0245466
NPIPA1	16p13.11	0.174122	0.00223703	0.0245987
WASHC2A	10q11.23	0.174061	0.00224514	0.0246744
TRIM56	7q22.1	0.174043	0.00224764	0.0246883
PINK1	1p36.12	-0.174025	0.00225004	0.0247012
NOM1	7q36.3	0.174009	0.00225217	0.0247025
GTF2IRD1	7q11.23	0.174005	0.00225262	0.0247025
AOPEP	9q22.32	0.17392	0.00226409	0.0248123
PRIMPOL	4q35.1	0.173912	0.0022651	0.0248123
DPF1	19q13.2	-0.173833	0.00227585	0.0249164
EP400P1	12q24.33	0.173807	0.00227929	0.0249374
ANKAR	2q32.2	0.1738	0.00228025	0.0249374
MVD	16q24.2	-0.173783	0.00228258	0.0249492
SMAD2	18q21.1	0.173685	0.00229595	0.0250817
ASMTL	Xp22.33 and Yp11.2	-0.173578	0.00231049	0.0252268
BAG6	6p21.33	-0.173559	0.00231313	0.0252397
RPS10	6p21.31	-0.173541	0.00231554	0.0252397
FAM181A	14q32.12	-0.173533	0.00231673	0.0252397
LINC01098	4q34.3	0.173525	0.00231784	0.0252397
LOXL3	2p13.1	-0.173524	0.00231796	0.0252397
LHFPL1	Xq23	-0.173505	0.00232053	0.025254
FKBP1B	2p23.3	-0.173476	0.00232459	0.0252844
UAP1	1q23.3	0.173439	0.00232967	0.025326
FRS2	12q15	0.173361	0.00234045	0.0254163
SLC25A38	3p22.1	-0.17336	0.0023405	0.0254163
TET3	2p13.1	0.173328	0.00234504	0.0254517
TRPM7	15q21.2	0.173313	0.00234707	0.025457
COLCA2	11q23.1	0.173306	0.00234806	0.025457
FOXO1	13q14.11	0.173274	0.00235249	0.0254913
ZNF765	19q13.42	0.173223	0.00235962	0.0255546
BMS1P2	10q11.22	0.173213	0.00236108	0.0255546
KHDRBS1	1p35.2	-0.173203	0.00236237	0.0255546
PDIA4	7q36.1	-0.173196	0.00236343	0.0255546
GRAMD1C	3q13.31	0.173142	0.00237094	0.0256219
CALHM2	10q24.33	-0.173106	0.00237605	0.0256634
CIAO2B	16q22.1	-0.173095	0.00237758	0.0256661
TIRAP	11q24.2	0.173077	0.00238006	0.025679
CCDC22	Xp11.23	-0.173024	0.00238762	0.0257468
TRIL	7p14.3	-0.172942	0.00239911	0.0258568
PPL	16p13.3	0.172906	0.00240429	0.0258911
TTTY15	Yq11.221	-0.172902	0.00240487	0.0258911
LMBR1L	12q13.12	-0.172877	0.0024084	0.0259151
PEX14	1p36.22	-0.172862	0.0024106	0.0259249
CNOT2	12q15	0.172815	0.00241723	0.0259757
PTGES3	12q13.3|12	-0.172788	0.00242118	0.0259757
TJP1	15q13.1	0.172787	0.00242124	0.0259757
ARV1	1q42.2	0.172777	0.00242262	0.0259757
ZNF597	16p13.3	0.172777	0.00242264	0.0259757
MSH4	1p31.1	0.172774	0.00242309	0.0259757
ZNF592	15q25.3	0.172764	0.00242454	0.0259774
CCDC144A	17p11.2	0.172734	0.00242878	0.026009
MRFAP1	4p16.1	-0.172681	0.00243644	0.026077
FOXN1	17q11.2	0.172664	0.00243884	0.0260888
TCF25	16q24.3	-0.172605	0.00244742	0.0261667
SOX4	6p22.3	-0.172592	0.00244936	0.0261734
TOR1AIP1	1q25.2	0.172576	0.0024516	0.0261834
ZMYND10	3p21.31	-0.172565	0.00245323	0.026187
ATG16L2	11q13.4	0.172508	0.00246149	0.0262611
RALGAPA1	14q13.2	0.172448	0.00247013	0.0263293
ZBTB4	17p13.1	0.172446	0.0024705	0.0263293
NPIPB5	16p12.2	0.172431	0.00247264	0.026338
ANO7	2q37.3	-0.172367	0.00248199	0.0264211
GINS2	16q24.1	-0.172359	0.00248318	0.0264211
DUOX2	15q21.1	0.172351	0.00248438	0.0264211
NELFCD	20q13.32	-0.172326	0.002488	0.0264456
WASH2P	2q14.1	-0.172309	0.00249052	0.026446
SDCBP2	20p13	0.172304	0.00249126	0.026446
2019-03-06	5p15.2	0.172299	0.002492	0.026446
DHRSX	Xp22.33 and Yp11.2	-0.17228	0.00249476	0.0264614
ZNF805	19q13.43	0.17225	0.00249914	0.0264889
ZSWIM8	10q22.2	0.172244	0.0025	0.0264889
SMIM1	1p36.32	-0.172218	0.00250389	0.0265161
IFI16	1q23.1	0.172133	0.00251645	0.0266175
LARP1	5q33.2	0.172129	0.00251701	0.0266175
ZNF587	19q13.43	0.172126	0.00251744	0.0266175
NBEAL2	3p21.31	0.172078	0.00252459	0.026679
SLC35E1	19p13.11	0.172049	0.00252895	0.026711
LINC00965	8p23.1	0.172027	0.00253225	0.0267211
RBM10	Xp11.3	-0.172024	0.00253256	0.0267211
C17ORF49	17p13.1	-0.171996	0.00253675	0.0267511
SSR3	3q25.31	-0.171969	0.00254087	0.0267806
EP300	22q13.2	0.171936	0.00254582	0.0268187
CDCA3	12p13.31	-0.171918	0.00254839	0.0268317
NKAP	Xq24	-0.171908	0.0025499	0.0268334
VPS11	11q23.3	0.171898	0.00255141	0.0268352
ZDHHC5	11q12.1	0.171883	0.00255367	0.026845
COX4I2	20q11.21	-0.171873	0.00255525	0.0268475
PRSS45P	3p21.31	-0.171856	0.0025578	0.0268602
LHPP	10q26.13	-0.17182	0.00256324	0.0269033
FAM241B	10q22.1	-0.171799	0.00256633	0.0269217
MAP3K11	11q13.1	-0.171771	0.0025705	0.0269513
PRR3	6p21.33	-0.171712	0.0025795	0.0270201
ANXA6	5q33.1	-0.17171	0.00257975	0.0270201
MICOS10	1p36.13	-0.171701	0.00258121	0.0270213
PIBF1	13q21.33-q22.1	0.171653	0.00258839	0.0270809
C12ORF29	12q21.32	0.171645	0.0025896	0.0270809
ATP6V1G1	9q32	0.171587	0.00259847	0.0271594
POLR1E	9p13.2	0.171531	0.0026071	0.027222
ZNF668	16p11.2	-0.17153	0.00260717	0.027222
LYST	1q42.3	0.171521	0.00260864	0.0272232
SLC22A13	3p22.2	0.171505	0.00261109	0.0272346
TUBA8	22q11.21	-0.171449	0.00261969	0.0273101
FKBP8	19p13.11	-0.171427	0.00262303	0.0273286
ZBTB7C	18q21.1	0.171419	0.00262419	0.0273286
KAT7	17q21.33	0.17141	0.00262555	0.0273286
SEMA4F	2p13.1	-0.171365	0.00263258	0.0273686
IFT57	3q13.12-q13.13	-0.171362	0.00263303	0.0273686
NFE2L2	2q31.2	0.171359	0.00263349	0.0273686
NR4A2	2q24.1	0.171319	0.0026397	0.0274014
SCRN3	2q31.1	0.171316	0.00264015	0.0274014
VAC14	16q22.1-q22.2	-0.171312	0.00264073	0.0274014
NTN3	16p13.3	0.171302	0.00264226	0.027403
RABGEF1	7q11.21	0.171256	0.00264943	0.0274545
B4GALNT4	11p15.5	-0.171253	0.00264996	0.0274545
NPM3	10q24.32	-0.171218	0.00265536	0.0274874
DTD1	20p11.23	-0.171214	0.00265588	0.0274874
RTL5	Xq13.1	-0.171157	0.00266488	0.0275664
KANSL2	12q13.11	0.171109	0.00267228	0.0276287
DYRK1B	19q13.2	-0.17106	0.00268002	0.0276944
METTL18	1q24.2	0.171043	0.00268265	0.0277073
DHFR	5q14.1	0.171018	0.00268659	0.0277325
PLVAP	19p13.11	-0.17101	0.00268784	0.0277325
MDK	11p11.2	-0.170981	0.00269239	0.0277651
ZNF641	12q13.11	0.170962	0.00269543	0.027774
PLD3	19q13.2	-0.170954	0.00269668	0.027774
ZNF770	15q14	0.170949	0.00269741	0.027774
DBT	1p21.2	0.170937	0.00269933	0.0277795
SLC30A6	2p22.3	0.170927	0.00270091	0.0277816
BCAP31	Xq28	-0.170897	0.00270575	0.0278171
IFNGR2	21q22.11	-0.17086	0.00271158	0.0278628
BRCA1	17q21.31	0.17084	0.00271477	0.0278752
ZNF646	16p11.2	0.170835	0.00271557	0.0278752
ALPK1	4q25	0.170808	0.00271976	0.027904
ZNF433	19p13.2	-0.170734	0.00273156	0.0280107
ZNF775	7q36.1	-0.170711	0.00273518	0.0280335
COX8A	11q13.1	-0.170668	0.00274215	0.0280905
ZMYM6	1p34.3	0.170655	0.00274423	0.0280975
RIOK3	18q11.2	0.170616	0.00275047	0.0281471
MYDGF	19p13.3	-0.170595	0.00275391	0.0281679
RWDD1	6q22.1	-0.17057	0.00275781	0.0281935
DNTTIP1	20q13.12	-0.170547	0.00276159	0.0282177
DIP2B	12q13.12	0.170481	0.00277221	0.0283118
CD1D	1q23.1	-0.17045	0.00277729	0.0283372
B3GAT2	6q13	0.170448	0.00277752	0.0283372
HEATR4	14q24.3	0.170423	0.00278158	0.0283642
PARL	3q27.1	-0.170394	0.0027864	0.0283989
MSI1	12q24.31	-0.170363	0.00279136	0.0284219
TCP1	6q25.3	-0.170358	0.00279226	0.0284219
SMCR8	17p11.2	0.17034	0.00279505	0.0284219
APLP1	19q13.12	-0.170337	0.0027956	0.0284219
DNM2	19p13.2	0.170336	0.00279574	0.0284219
KCNN2	5q22.3	-0.170317	0.00279885	0.0284392
CD99	Xp22.33 and Yp11.2	-0.170307	0.00280052	0.0284417
SP140L	2q37.1	0.170277	0.00280544	0.0284773
F2RL3	19p13.11	-0.170254	0.00280921	0.0284937
UBE2M	19q13.43	-0.17025	0.0028099	0.0284937
DDTL	22q11.23	-0.17024	0.00281141	0.0284946
ZFX	Xp22.11	0.170223	0.00281429	0.0285044
NPY	7p15.3	-0.170217	0.00281521	0.0285044
ARL4C	2q37.1	-0.170192	0.00281931	0.0285245
ARHGAP21	10p12.1|10p12.3	0.170187	0.0028202	0.0285245
DTYMK	2q37.3	-0.170177	0.00282172	0.0285245
FTL	19q13.33	-0.17017	0.00282289	0.0285245
SCAF4	21q22.11	0.170131	0.00282937	0.0285756
MRGBP	20q13.33	-0.17003	0.00284597	0.0287288
ARL16	17q25.3	-0.169929	0.00286287	0.0288725
COX10	17p12	0.169927	0.00286308	0.0288725
C9ORF40	9q21.13	0.169907	0.00286643	0.0288918
MMAA	4q31.21	0.169848	0.00287629	0.0289766
EEFSEC	3q21.3	-0.169828	0.00287966	0.0289939
DLK1	14q32.2	-0.169821	0.0028809	0.0289939
DSP	6p24.3	0.169801	0.00288429	0.0290135
GPR157	1p36.22	0.169784	0.00288699	0.0290261
ARID2	12q12	0.169741	0.00289428	0.0290848
PPP3CC	8p21.3	0.169715	0.00289872	0.0291149
RHBDF1	16p13.3	0.169698	0.00290154	0.0291169
[truncated: 18,069 more rows]
